# Supplementary material for: Microtubule assembly by tau impairs endocytosis and neurotransmission via dynamin sequestration in Alzheimer’s disease synapse model
Source: eLife. 2022 Apr 26;11:e73542. doi: 10.7554/eLife.73542 (PMC9071263; doi:10.7554/eLife.73542)
Supplement: Figure 1—figure supplement 1—source data 2. [file elife-73542-fig1-figsupp1-data2.xlsx]

## Sheet: SFig1
Legend :Data from Figure 1 figure supplement 1 B
	Time	Tubulin	SEM		WT h-Tau	SEM		del-MTBD	SEM		Taxol	SEM
	0	0.570167	0.00913569		0.9688	0.104521		0.613133	0.0215312		0.6937	0.0157978
	1	0.560433	0.0112555		1.7328	0.279406		0.601267	0.025056		0.7336	0.0357725
	2	0.5473	0.0117567		2.30873	0.269274		0.588233	0.0250601		0.825467	0.0900623
	3	0.532967	0.0127488		2.7114	0.154899		0.574733	0.0258007		0.9218	0.141364
	4	0.5207	0.0146129		2.96443	0.0595881		0.5637	0.0242553		1.04737	0.183901
	5	0.513433	0.0152507		3.09813	0.0257541		0.555367	0.023071		1.18427	0.23091
	6	0.507	0.014104		3.1659	0.0499118		0.551133	0.0232199		1.3381	0.278245
	7	0.498667	0.0148307		3.18577	0.0640367		0.5474	0.0226053		1.49983	0.322265
	8	0.495033	0.012085		3.20757	0.0656006		0.550667	0.0236534		1.63853	0.350967
	9	0.4885	0.0129859		3.22177	0.0648594		0.553733	0.0226498		1.78503	0.378412
	10	0.486567	0.0120298		3.22253	0.0650115		0.562733	0.0230945		1.8992	0.391418
	11	0.484133	0.0131095		3.21097	0.06801		0.574133	0.0232337		2.00517	0.391892
	12	0.4814	0.00992395		3.2211	0.0555758		0.589633	0.0238641		2.1123	0.39186
	13	0.4808	0.0114333		3.21887	0.06794		0.610967	0.0227847		2.20707	0.389246
	14	0.4807	0.0105523		3.21077	0.0804371		0.632967	0.0243262		2.29167	0.381184
	15	0.480433	0.0125406		3.20397	0.0762665		0.657533	0.0255243		2.36297	0.373655
	16	0.480633	0.0114741		3.19553	0.0757468		0.682367	0.0247685		2.4206	0.368057
	17	0.480467	0.0114492		3.19043	0.0758569		0.711767	0.0235854		2.4765	0.356937
	18	0.482	0.0119855		3.18673	0.0784233		0.7358	0.0270423		2.5308	0.343936
	19	0.480467	0.0129971		3.18017	0.0761197		0.765867	0.02856		2.57117	0.338186
	20	0.484033	0.0126923		3.17317	0.077245		0.796933	0.026298		2.6106	0.323135
	21	0.4825	0.0123125		3.17283	0.0788652		0.8274	0.0281991		2.6403	0.318474
	22	0.4858	0.0137694		3.17003	0.0724411		0.856	0.0305583		2.66787	0.311984
	23	0.4854	0.0123261		3.16273	0.0777662		0.887567	0.0323439		2.69303	0.300942
	24	0.487733	0.0145694		3.14807	0.0712089		0.9137	0.0332303		2.72777	0.282681
	25	0.490533	0.0142786		3.15023	0.0613355		0.940667	0.0349827		2.74857	0.264158
	26	0.491133	0.0138727		3.13887	0.0563113		0.973633	0.0381259		2.76837	0.26137
	27	0.492433	0.0150364		3.13243	0.0573018		1.001	0.039071		2.7809	0.247627
	28	0.4943	0.0153262		3.1327	0.0637273		1.03143	0.0392837		2.7988	0.239236
	29	0.495467	0.0165761		3.11893	0.0680822		1.0619	0.0419698		2.8146	0.229194
	30	0.499233	0.0165191		3.11017	0.0681176		1.08997	0.0451404		2.8296	0.219348
