# Supplementary material for: Microtubule assembly by tau impairs endocytosis and neurotransmission via dynamin sequestration in Alzheimer’s disease synapse model
Source: eLife. 2022 Apr 26;11:e73542. doi: 10.7554/eLife.73542 (PMC9071263; doi:10.7554/eLife.73542)
Supplement: Figure 2—source data 1. [file elife-73542-fig2-data1.xlsx]

## Sheet: Fig2_waves
Legend: Inhibition of SV endocytosis is the primary effect of WT h-tau loading, data for waves
		A	Control				Tau
	Time		i	ii	iii		i	ii	iii
	-5		0.00222304	0.00485995	0.00399308		-0.000286788	-0.00638502	0.00384243
	-4.5		-0.000254629	0.00296234	0.00137154		0.000772734	0.000554897	0.0038119
	-4		0.00147395	-0.00157694	0.000150001		0.00190198	-0.00705686	0.00378136
	-3.5		-0.0034433	0.00235671	0.000203459		0.00246733	0.0016425	0.00313083
	-3		-0.00470222	0.0021591	0.000727751		-6.62e-06	0.000571302	0.00290729
	-2.5		0.0017097	-0.00328226	-0.000797957		-0.00121085	0.00525399	0.00342043
	-2		0.00296536	-0.00288404	-0.00220908		-0.00300827	-0.00315165	-0.00225977
	-1.5		0.00359811	-0.00243373	-0.00426812		-0.00337541	-0.000251183	-0.00837531
	-1		0.000105854	0.0012645	-0.00425216		0.00291175	0.00388206	-0.00347351
	-0.5
	0		0.352134	0.300332	0.263226		0.36292	0.31217	0.187247
	0.5		0.343842	0.291495	0.257585		0.349665	0.298498	0.180996
	1		0.324179	0.285953	0.25026		0.336508	0.292922	0.176932
	1.5		0.311899	0.271762	0.238373		0.317603	0.283747	0.170668
	2		0.296773	0.258683	0.228677		0.301746	0.27707	0.163928
	2.5		0.283729	0.249656	0.21997		0.289044	0.27457	0.160589
	3		0.269955	0.236213	0.210598		0.275825	0.262335	0.159901
	3.5		0.257644	0.234026	0.2017		0.269331	0.253762	0.162759
	4		0.237935	0.222799	0.191516		0.258201	0.248605	0.151711
	4.5		0.232901	0.209455	0.183292		0.244963	0.251253	0.146201
	5		0.221997	0.203004	0.177373		0.234496	0.246274	0.151777
	5.5		0.210573	0.196454	0.170522		0.221495	0.237263	0.151679
	6		0.201904	0.192917	0.165936		0.210877	0.237036	0.146629
	6.5		0.192055	0.18179	0.160635		0.206345	0.228037	0.146694
	7		0.185317	0.173942	0.154578		0.199312	0.225303	0.142284
	7.5		0.175619	0.170218	0.147613		0.188011	0.221912	0.140631
	8		0.165656	0.16676	0.145185		0.184784	0.224868	0.140421
	8.5		0.158688	0.160725	0.139805		0.178609	0.216016	0.140274
	9		0.148057	0.157464	0.134461		0.165224	0.213458	0.139144
	9.5		0.145344	0.149825	0.128808		0.160442	0.209335	0.139004
	10		0.14206	0.149813	0.12322		0.153757	0.216156	0.132533
	10.5		0.133992	0.144063	0.12275		0.15023	0.212436	0.138267
	11		0.129363	0.140826	0.119664		0.148582	0.211451	0.135905
	11.5		0.12097	0.133362	0.114861		0.143477	0.204887	0.139114
	12		0.117139	0.123268	0.111675		0.140909	0.208154	0.135024
	12.5		0.114859	0.12426	0.110631		0.128295	0.206722	0.138292
	13		0.113654	0.119396	0.106274		0.128889	0.206527	0.135467
	13.5		0.11132	0.116769	0.104527		0.126758	0.204363	0.133875
	14		0.107072	0.112084	0.10166		0.12131	0.194274	0.133
	14.5		0.100175	0.109522	0.100872		0.118483	0.199628	0.132354
	15		0.102598	0.108472	0.0992273		0.117156	0.200655	0.128192
	15.5		0.0952094	0.101771	0.0972516		0.113388	0.192794	0.126223
	16		0.0898818	0.10549	0.0944613		0.109089	0.200221	0.131295
	16.5		0.0820624	0.0963732	0.0880189		0.106856	0.198892	0.129713
	17		0.0904868	0.0977631	0.0872765		0.102082	0.194727	0.133743
	17.5		0.0853467	0.0942072	0.0843529		0.0994641	0.190877	0.131165
	18		0.0813836	0.0906241	0.0855126		0.098503	0.192785	0.128311
	18.5		0.0867455	0.0855932	0.083339		0.0935627	0.193041	0.12778
	19		0.0838887	0.0871539	0.0811299		0.0931146	0.196675	0.133127
	19.5		0.0826839	0.082398	0.0770626		0.0913501	0.191152	0.126935
	20		0.07565	0.0884775	0.0767452		0.0863454	0.186685	0.124164
	20.5		0.0777577	0.0806278	0.0775841		0.0845999	0.192095	0.124854
	21		0.0755947	0.0821802	0.0728292		0.0874424	0.184531	0.129564
	21.5		0.0655087	0.0791013	0.0732056		0.0811134	0.183217	0.125807
	22		0.0732956	0.0797745	0.0689819		0.0772482	0.184504	0.12855
	22.5		0.0728471	0.0768415	0.0678125		0.0768216	0.182267	0.127946
	23		0.0731548	0.0761481	0.0660784		0.0763348	0.180929	0.125445
	23.5		0.0697855	0.0741755	0.0646152		0.0735014	0.177662	0.130238
	24		0.0698141	0.0699883	0.0650895		0.0689448	0.177202	0.126758
	24.5		0.0578656	0.0702115	0.0612742		0.0720424	0.175383	0.128367
	25		0.0550275	0.070191	0.0590798		0.0731662	0.173225	0.131859
	25.5		0.0651061	0.0652892	0.0593749		0.0706652	0.176077	0.132635
	26		0.0593992	0.0669291	0.0585659		0.0707355	0.169526	0.129246
	26.5		0.0595778	0.0659919	0.0541839		0.0654139	0.182376	0.128524
	27		0.0581626	0.0601276	0.054704		0.0678453	0.172917	0.121291
	27.5		0.0552454	0.0635279	0.0524721		0.062413	0.176366	0.124211
	28		0.0471656	0.0627011	0.0503214		0.0639662	0.178932	0.123009
	28.5		0.0536588	0.0625494	0.0497915		0.0615583	0.179293	0.124486
	29		0.0447436	0.0607309	0.0474095		0.059731	0.17911	0.126774
	29.5		0.0537451	0.0551667	0.0449526		0.0579336	0.18229	0.117963
	30		0.0454924	0.0586336	0.0414435		0.0545185	0.175877	0.124016

## Sheet: Fig2_plots
Legend: Inhibition of SV endocytosis is the primary effect of WT h-tau loading, data for plots
		B	Endocytic rate					Normalized dCm					Qca
	Time		Ctr	SEM	Tau	SEM		Ctr	SEM	Tau	SEM		Ctr	SEM	Tau	SEM
i	10		0.0606387	0.00622686	0.0548724	0.00668206		1	0	1	0		28.5964	4.32891	27.6959	2.46361
ii	20		0.0522883	0.00727534	0.0294565	0.00418988		0.882478	0.0668397	0.801	0.0792123		28.3807	3.88401	27.0432	1.68174
iii	30		0.050916	0.00457355	0.0182816	0.00601578		0.825509	0.0820634	0.562	0.133695		27.5202	3.61409	25.1986	1.94834
