# Supplementary material for: Microtubule assembly by tau impairs endocytosis and neurotransmission via dynamin sequestration in Alzheimer’s disease synapse model
Source: eLife. 2022 Apr 26;11:e73542. doi: 10.7554/eLife.73542 (PMC9071263; doi:10.7554/eLife.73542)
Supplement: Figure 3—source data 1. [file elife-73542-fig3-data1.xlsx]

## Sheet: Fig3_A
Legend: The MT assembly blocker nocodazole prevented tau-induced block of SV endocytosis and EPSC rundown, data for Figure 3 A
	Time		Noc 0	SEM		Noc 1	SEM		Noc 10	SEM		Noc 20	SEM		Noc 50	SEM
	0		0	0		0	0		0	0		0	0		0	0
	1		1.08472	0.130275		0.7566	0.0867158		0.0230833	0.0426734		-0.0459167	0.0245643		-0.00223333	0.013532
	2		1.64147	0.108978		1.34442	0.0687398		0.0686167	0.0513345		-0.0570833	0.0291026		0.00313333	0.0171888
	3		1.89068	0.110103		1.7091	0.0761357		0.1408	0.0721557		-0.06825	0.0266801		0.00758333	0.0166021
	4		2.01243	0.119068		1.90365	0.0775255		0.259117	0.0977496		-0.0770333	0.0257193		0.0140667	0.0158181
	5		2.08643	0.110927		2.00803	0.0828817		0.443317	0.141371		-0.0774167	0.0290517		0.0123333	0.0163855
	6		2.12667	0.112489		2.06797	0.0770909		0.676083	0.182282		-0.0780667	0.0255818		0.0116667	0.0141574
	7		2.16948	0.114432		2.10632	0.075452		0.9165	0.216131		-0.0752333	0.0278138		0.00945	0.0135115
	8		2.20033	0.124669		2.14517	0.0746708		1.13242	0.224876		-0.0744833	0.0310404		0.011	0.0136339
	9		2.2094	0.11828		2.17005	0.0730674		1.32615	0.228311		-0.0715833	0.0319536		0.00813333	0.0143643
	10		2.2239	0.107717		2.18987	0.0798336		1.47368	0.222577		-0.0678333	0.0351129		0.0014	0.0145093
	11		2.23395	0.103411		2.211	0.0662036		1.60082	0.221985		-0.0679667	0.0386394		-0.000233333	0.0131019
	12		2.25203	0.101963		2.21543	0.0725215		1.70692	0.230671		-0.0674167	0.0398062		-0.00643333	0.0132265
	13		2.24655	0.092186		2.22052	0.068102		1.7883	0.22418		-0.06705	0.0407501		-0.00966667	0.0122507
	14		2.24872	0.0945496		2.23505	0.0682523		1.8625	0.230151		-0.0689833	0.043456		-0.0142667	0.0152585
	15		2.24098	0.0955501		2.22577	0.0775961		1.91528	0.219642		-0.0661667	0.0388002		-0.0173833	0.0127617
	16		2.25708	0.0954495		2.22645	0.0633371		1.97058	0.221585		-0.0678167	0.0452917		-0.0231167	0.0137696
	17		2.2477	0.0921185		2.22207	0.0730059		2.01478	0.21118		-0.0642833	0.046607		-0.0246167	0.0154752
	18		2.23057	0.0926213		2.214	0.0639641		2.04713	0.199741		-0.0655333	0.0488665		-0.0281833	0.0119676
	19		2.23092	0.0882041		2.21413	0.0673701		2.08587	0.190516		-0.0643667	0.0503017		-0.03275	0.0123086
	20		2.22105	0.0905839		2.22205	0.0700914		2.10687	0.186168		-0.0627167	0.0496937		-0.0342833	0.0136016
	21		2.2254	0.0837241		2.21135	0.0626429		2.12818	0.184463		-0.0626167	0.0545411		-0.0360333	0.0165289
	22		2.21148	0.0814224		2.21463	0.0641244		2.1508	0.174573		-0.0591	0.0533153		-0.03995	0.0167345
	23		2.21172	0.0872235		2.21227	0.0768916		2.16673	0.176995		-0.0574667	0.0594384		-0.04155	0.0125556
	24		2.20627	0.0902489		2.2119	0.0785156		2.17973	0.176482		-0.05585	0.0607507		-0.0436833	0.0134099
	25		2.19273	0.0975813		2.2099	0.0757102		2.19012	0.169516		-0.0527167	0.063791		-0.0467	0.0136071
	26		2.18753	0.0920581		2.20012	0.0816011		2.19273	0.164372		-0.0491167	0.0674202		-0.0475333	0.013519
	27		2.1812	0.0851644		2.17588	0.0763858		2.19968	0.156328		-0.0334333	0.0879844		-0.0491167	0.0133268
	28		2.17017	0.0826185		2.18978	0.086585		2.21237	0.161335		-0.04765	0.069133		-0.0516667	0.0149044
	29		2.16848	0.0799151		2.18715	0.0803404		2.20595	0.152259		-0.0445667	0.0689241		-0.0536667	0.0146859
	30		2.16548	0.0802663		2.18305	0.0664691		2.21498	0.155075		-0.0453833	0.0714182		-0.0544833	0.0137117

## Sheet: Fig3_B
Legend: The MT assembly blocker nocodazole prevented tau-induced block of SV endocytosis and EPSC rundown, data for Figure 3 B
	Time	Control	Tau	Noc + Tau	Noc				Endocytic rate	SEM		Ctrl	Tau	Noc + Tau	Noc			dCm	SEM		Ctrl	Tau	Noc + Tau	Noc
	-5	-0.000872	0.00221	-0.000572	0.00244			Ctrl	0.0590174	0.00513222		0.0544474	0.0150145	0.0454345	0.0373076		Ctrl	0.412605	0.0212523		0.424151	0.455625	0.450967	0.45536
	-4.5	-5.28e-05	0.0059	-0.00299	0.00178			Tau	0.0265432	0.00333218		0.0560756	0.0415896	0.0533229	0.0639485		Tau	0.385684	0.0225698		0.33173	0.467865	0.45	0.508145
	-4	-0.00137	0.00148	-0.000461	0.000501			Noc + Tau	0.0544986	0.00581591		0.0389132	0.0375459	0.0656719	0.0385935		Noc + Tau	0.413834	0.0298895		0.402669	0.315085	0.45343	0.465533
	-3.5	-0.00046	0.000738	-0.00168	-0.000407			Noc	0.0564495	0.00443447		0.0754987	0.0287532	0.0401299	0.0689351		Noc	0.406853	0.0220268		0.395279	0.3375	0.4112	0.3059
	-3	-0.000509	0.00295	-0.00127	0.00651							0.0679645	0.0265532	0.0693545	0.0656416						0.491	0.3836	0.3178	0.3728
	-2.5	-0.000185	-0.00443	0.000378	0.00404							0.0612052	0.0172078	0.0697	0.068505						0.4308	0.4533	0.46343	0.4658
	-2	0.000789	0	0.000682	0.00188								0.0261558	0.0654916	0.0385587							0.3288	0.4012	0.3233
	-1.5	0.000926	0	0.0013	-0.000814								0.0195257	0.0424907								0.3437	0.3068
	-1	0.000444	-0.00369	0.000416	0.00219
	-0.5	0.000364	-0.00221	0.000917	-0.000157
	0.025	0.31	0.295	0.302	0.313
	0.525	0.307	0.282	0.289718	0.306
	1.025	0.301	0.28	0.277626	0.296
	1.525	0.294	0.276	0.261931	0.283
	2.025	0.287	0.273	0.250296	0.277
	2.525	0.28	0.269	0.244408	0.264
	3.025	0.269	0.26	0.233845	0.256
	3.525	0.262	0.26	0.228073	0.244
	4.025	0.253	0.256	0.217458	0.234
	4.525	0.236	0.25	0.210022	0.232
	5.025	0.231	0.243	0.201057	0.207
	5.525	0.221	0.242	0.199456	0.2
	6.025	0.212	0.243	0.193821	0.185
	6.525	0.207	0.241	0.188	0.186
	7.025	0.198	0.236	0.186362	0.181
	7.525	0.187	0.235	0.179742	0.178
	8.025	0.179	0.231	0.176689	0.175
	8.525	0.169	0.226	0.171505	0.17
	9.025	0.162	0.228	0.172669	0.166
	9.525	0.161	0.224	0.167674	0.157
	10.025	0.155	0.224	0.16223	0.152
	10.525	0.149	0.22	0.155859	0.155
	11.025	0.141	0.219	0.149815	0.154
	11.525	0.139	0.224	0.151007	0.148
	12.025	0.136	0.217	0.144554	0.144
	12.525	0.13	0.217	0.138666	0.135
	13.025	0.128	0.213	0.133969	0.152
	13.525	0.123	0.215	0.128947	0.137
	14.025	0.119	0.213	0.127154	0.141
	14.525	0.118	0.216	0.125999	0.128
	15.025	0.114	0.214	0.122884	0.122
	15.525	0.113	0.214	0.124665	0.114
	16.025	0.109	0.209	0.115604	0.114
	16.525	0.108	0.21	0.120384	0.114
	17.025	0.105	0.21	0.115984	0.112
	17.525	0.103	0.213	0.114011	0.11
	18.025	0.0989	0.215	0.108935	0.105
	18.525	0.0977	0.212	0.102768	0.0995
	19.025	0.0933	0.214	0.106354	0.105
	19.525	0.0923	0.211	0.101606	0.0972
	20.025	0.0907	0.216	0.0989102	0.0884
	20.525	0.0863	0.221	0.0961726	0.0903
	21.025	0.0846	0.217	0.0946011	0.0891
	21.525	0.0843	0.219	0.0922645	0.0799
	22.025	0.0821	0.221	0.0870784	0.0854
	22.525	0.084	0.228	0.0836685	0.0894
	23.025	0.0773	0.223	0.0845957	0.0854
	23.525	0.0748	0.216	0.0839987	0.0786
	24.025	0.0744	0.214	0.0830398	0.0734
	24.525	0.0729	0.216	0.0797997	0.0746
	25.025	0.0723	0.215	0.0821295	0.0731
	25.525	0.0727	0.216	0.0783232	0.0742
	26.025	0.0722	0.214	0.0766375	0.067
	26.525	0.0718	0.217	0.0786499	0.0724
	27.025	0.0696	0.216	0.0815518	0.067
	27.525	0.0678	0.219	0.0817596	0.0637
	28.025	0.0671	0.215	0.0794532	0.0621
	28.525	0.0649	0.218	0.07709	0.0662
	29.025	0.0655	0.215	0.0787071	0.0659
	29.525	0.0632	0.218	0.0727158	0.0664
	30.025	0.065	0.219	0.0717636	0.0601

## Sheet: Fig3_C
Legend: The MT assembly blocker nocodazole prevented tau-induced block of SV endocytosis and EPSC rundown, data for Figure 3 C
						Time	Noc	SEM		Noc + Tau	SEM		Tau			Wave
						-10	1.07019	0.0471564		0.976927	0.0980815		1.00877			time	i	ii
						-9	1.06488	0.0349285		0.990286	0.0204297		0.976681			0	-57.0679	-133.362
						-8	1.01388	0.0367158		0.966419	0.0539116		1.0295			0.02	-44.8608	-126.038
						-7	1.04481	0.0374646		0.995889	0.0566986		1.10358			0.04	-36.6211	-120.544
						-6	1.03673	0.0292559		0.920784	0.0705734		1.01944			0.06	-47.9126	-127.258
						-5	1.04711	0.0262837		0.990126	0.0656088		0.956947			0.08	-59.5093	-137.634
						-4	1.09081	0.0267425		1.0464	0.0235529		1.04839			0.1	-56.7627	-132.446
						-3	1.01282	0.025251		1.00298	0.0153424		0.961462			0.12	-51.2695	-127.258
						-2	0.964704	0.0216663		0.994916	0.0370401		1.02268			0.14	-50.354	-134.277
						-1	0.978244	0.0360533		0.931962	0.0351773		0.935582			0.16	-54.6265	-136.414
						0	1.00572	0.022903		0.9441	0.0624839		0.863245			0.18	-56.4575	-127.869
						1	0.960479	0.0295902		0.945918	0.0507171		0.883108			0.2	-44.2505	-123.291
						2	0.948154	0.0173639		0.904621	0.0699743		0.779269			0.22	-41.8091	-119.934
						3	0.952144	0.0326932		0.896227	0.0626065		0.829438			0.24	-45.4712	-128.174
						4	1.01373	0.0416192		0.883614	0.0154297		0.814548			0.26	-50.0488	-132.446
						5	0.994338	0.0358405		0.940697	0.0493971		0.770941			0.28	-48.5229	-132.446
						6	1.0303	0.0399052		0.885044	0.0257483		0.706246			0.3	-44.8608	-130.615
						7	0.997019	0.0146875		0.90855	0.0688085		0.638961			0.32	-46.6919	-132.141
						8	1.0563	0.0455326		0.912216	0.0684061		0.65415			0.34	-48.5229	-131.226
						9	0.977151	0.0374018		0.924123	0.0349792		0.619355			0.36	-50.0488	-138.55
						10	0.960395	0.00911278		0.833397	0.0575369		0.570473			0.38	-52.1851	-145.264
						11	1.00621	0.0549142		0.936458	0.0510977		0.610337			0.4	-44.2505	-144.348
						12	1.03787	0.0679782		0.818189	0.0998349		0.550527			0.42	-49.1333	-139.465
						13	1.05684	0.0325982		0.833007	0.0456685		0.614241			0.44	-58.2886	-144.958
						14	0.96733	0.0339361		0.829806	0.099134		0.551537			0.46	-61.3403	-162.659
						15	1.00543	0.0519202		0.840761	0.0492104		0.536721			0.48	-56.4575	-168.152
						16	1.04955	0.061612		0.849527	0.0654071		0.466273			0.5	-44.5557	-156.25
						17	1.02728	0.0474021		0.807287	0.0545451		0.438392			0.52	-40.2832	-148.621
						18	1.07437	0.0863051		0.857729	0.0637704		0.406845			0.54	-46.0815	-148.621
						19	0.979457	0.105727		0.882526	0.0652834		0.392983			0.56	-51.2695	-144.043
						20	1.03428	0.108146		0.851746	0.0562258		0.418956			0.58	-57.0679	-135.803
						21	1.06564	0.0980777		0.813627	0.0765555		0.356306			0.6	-66.2231	-131.226
						22	0.988547	0.0347324		0.864257	0.0572587		0.356337			0.62	-71.7163	-127.869
						23	1.01182	0.0606811		0.808255	0.076491		0.292739			0.64	-65.918	-126.038
						24	0.946262	0.0524428		0.853342	0.0445502		0.310121			0.66	-59.5093	-140.076
						25	1.02947	0.065827		0.797811	0.0719402		0.249612			0.68	-57.6782	-187.988
						26	0.97057	0.0428554		0.840969	0.0482361		0.265415			0.7	-56.7627	-306.702
						27	0.951725	0.0398035		0.796215	0.0729629		0.290458			0.72	-52.4902	-537.72
						28	0.97594	0.0460449		0.788022	0.0609133		0.232807			0.74	-52.4902	-895.081
						29	1.01945	0.0917649		0.771336	0.084365		0.268656			0.76	-71.106	-1397.71
						30	0.968901	0.0713105		0.856675	0.0475374		0.232726			0.78	-142.822	-2044.07
						31	1.01246	0.094854		0.717537	0.0404781		0.273714			0.8	-295.41	-2801.51
						32	0.963628	0.0329902		0.776725	0.0466961		0.258928			0.82	-560.608	-3633.42
						33	1.02635	0.0844059		0.808304	0.0788022		0.269152			0.84	-979.919	-4465.64
						34	1.07042	0.07951		0.797574	0.0410841		0.347628			0.86	-1579.9	-5231.63
						35	1.02202	0.0823808		0.746046	0.058593		0.304766			0.88	-2334.9	-5902.1
																0.9	-3164.98	-6461.49
																0.92	-3990.17	-6920.78
																0.94	-4767.15	-7275.09
																0.96	-5464.17	-7544.56
																0.98	-6067.5	-7749.63
																1	-6586.3	-7896.42
																1.02	-7030.03	-7994.69
																1.04	-7401.43	-8050.54
																1.06	-7723.39	-8084.41
																1.08	-8000.49	-8086.85
																1.1	-8214.11	-8041.08
																1.12	-8370.36	-7964.78
																1.14	-8484.19	-7861.02
																1.16	-8562.01	-7709.35
																1.18	-8600.16	-7535.71
																1.2	-8600.46	-7355.35
																1.22	-8571.17	-7144.47
																1.24	-8520.2	-6922
																1.26	-8446.04	-6699.52
																1.28	-8339.84	-6456.6
																1.3	-8208.31	-6210.33
																1.32	-8067.63	-5970.15
																1.34	-7923.28	-5719.6
																1.36	-7760.01	-5468.75
																1.38	-7572.94	-5230.71
																1.4	-7375.49	-4996.34
																1.42	-7176.82	-4765.93
																1.44	-6969.3	-4540.71
																1.46	-6752.62	-4313.96
																1.48	-6534.42	-4097.29
																1.5	-6311.95	-3898.01
																1.52	-6083.98	-3710.33
																1.54	-5859.07	-3533.63
																1.56	-5639.34	-3377.69
																1.58	-5419.01	-3229.68
																1.6	-5205.99	-3090.21
																1.62	-5003.36	-2959.29
																1.64	-4809.27	-2840.27
																1.66	-4609.99	-2720.95
																1.68	-4416.5	-2604.06
																1.7	-4234.62	-2494.81
																1.72	-4065.25	-2403.87
																1.74	-3899.54	-2315.67
																1.76	-3732.3	-2214.66
																1.78	-3579.71	-2113.65
																1.8	-3447.88	-2022.4
																1.82	-3314.82	-1931.76
																1.84	-3185.42	-1852.11
																1.86	-3064.88	-1784.97
																1.88	-2946.17	-1724.55
																1.9	-2839.36	-1672.36
																1.92	-2739.56	-1622.62
																1.94	-2640.38	-1575.62
																1.96	-2550.35	-1525.88
																1.98	-2466.13	-1475.22
																2	-2381.59	-1429.14
																2.02	-2300.72	-1382.14
																2.04	-2229.31	-1338.5
																2.06	-2153.63	-1297.61
																2.08	-2081.6	-1261.29
																2.1	-2012.02	-1228.03
																2.12	-1950.68	-1194.15
																2.14	-1903.08	-1163.02
																2.16	-1863.4	-1138.31
																2.18	-1820.37	-1111.15
																2.2	-1783.75	-1084.59
																2.22	-1742.25	-1064.76
																2.24	-1689.76	-1044.62
																2.26	-1648.25	-1025.7
																2.28	-1611.02	-1010.13
																2.3	-1563.11	-994.263
																2.32	-1525.88	-977.173
																2.34	-1493.84	-958.252
																2.36	-1457.82	-936.89
																2.38	-1424.56	-908.203
																2.4	-1386.72	-878.906
																2.42	-1347.66	-857.544
																2.44	-1323.85	-847.168
																2.46	-1292.42	-834.961
																2.48	-1255.19	-823.059
																2.5	-1230.16	-803.833
																2.52	-1212.46	-788.269
																2.54	-1189.58	-778.198
																2.56	-1168.52	-774.841
																2.58	-1143.19	-769.958
																2.6	-1111.15	-757.446
																2.62	-1087.34	-747.07
																2.64	-1070.56	-742.188
																2.66	-1050.42	-742.188
																2.68	-1031.49	-742.188
																2.7	-1011.96	-736.084
																2.72	-994.263	-726.929
																2.74	-980.225	-716.553
																2.76	-962.83	-698.547
																2.78	-948.792	-688.782
																2.8	-940.857	-685.73
																2.82	-921.326	-680.237
																2.84	-906.677	-668.64
																2.86	-898.132	-661.011
																2.88	-888.977	-657.349
																2.9	-881.958	-655.212
																2.92	-882.568	-644.226
																2.94	-876.16	-639.038
																2.96	-858.154	-640.259
																2.98	-854.492	-641.785
																3	-862.122	-643.616
																3.02	-867.615	-639.038
																3.04	-861.816	-624.084
																3.06	-851.746	-612.183
																3.08	-842.285	-608.215
																3.1	-830.078	-603.333
																3.12	-815.43	-597.839
																3.14	-798.645	-587.769
																3.16	-786.743	-581.665
																3.18	-776.978	-573.12
																3.2	-769.653	-569.153
																3.22	-761.719	-567.322
																3.24	-747.375	-560.303
																3.26	-737.61	-551.758
																3.28	-733.948	-548.096
																3.3	-726.929	-545.654
																3.32	-721.741	-545.349
																3.34	-711.975	-542.603
																3.36	-705.261	-543.518
																3.38	-702.515	-549.622
																3.4	-699.768	-552.063
																3.42	-693.97	-549.622
																3.44	-688.171	-546.57
																3.46	-685.73	-541.077
																3.48	-682.678	-532.227
																3.5	-669.25	-517.273
																3.52	-657.959	-506.592
																3.54	-655.212	-508.423
																3.56	-647.583	-512.085
																3.58	-639.648	-497.742
																3.6	-637.512	-481.567
																3.62	-633.24	-480.652
																3.64	-628.052	-480.957
																3.66	-617.065	-473.633
																3.68	-608.521	-469.971
																3.7	-607.91	-470.581
																3.72	-606.995	-466.309
																3.74	-604.858	-460.205
																3.76	-599.976	-452.881
																3.78	-592.041	-449.524
																3.8	-586.548	-453.186
																3.82	-587.769	-457.458
																3.84	-592.957	-455.933
																3.86	-594.482	-456.238
																3.88	-592.346	-453.186
																3.9	-592.041	-456.543
																3.92	-591.431	-456.543
																3.94	-592.957	-450.134
																3.96	-595.703	-445.862
																3.98	-598.755	-445.557
																4	-599.976	-448.914
																4.02	-595.093	-454.712
																4.04	-589.905	-455.627
																4.06	-583.496	-451.05
																4.08	-580.139	-454.407
																4.1	-577.087	-459.595
																4.12	-572.815	-456.238
																4.14	-563.66	-455.322
																4.16	-563.354	-456.848
																4.18	-570.068	-456.543
																4.2	-570.068	-461.731
																4.22	-567.932	-464.478
																4.24	-566.101	-462.036
																4.26	-560.608	-465.088
																4.28	-556.946	-469.971
																4.3	-554.81	-468.14
																4.32	-542.297	-457.153
																4.34	-532.227	-451.965
																4.36	-525.818	-447.998
																4.38	-518.799	-441.589
																4.4	-508.728	-435.486
																4.42	-494.08	-431.824
																4.44	-492.859	-431.519
																4.46	-493.774	-431.519
																4.48	-489.502	-438.538
																4.5	-487.671	-436.707
																4.52	-491.333	-428.162
																4.54	-490.112	-427.551
																4.56	-488.586	-432.739
																4.58	-483.704	-427.246
																4.6	-483.398	-422.363
																4.62	-481.262	-423.279
																4.64	-484.009	-422.363
																4.66	-486.145	-427.551
																4.68	-480.042	-433.044
																4.7	-478.21	-428.467
																4.72	-473.328	-426.025
																4.74	-469.971	-420.227
																4.76	-473.328	-414.124
																4.78	-476.379	-408.63
																4.8	-466.614	-404.968
																4.82	-463.867	-404.053
																4.84	-469.666	-404.663
																4.86	-462.036	-409.851
																4.88	-454.102	-410.461
																4.9	-462.341	-406.799
																4.92	-469.055	-405.884
																4.94	-468.14	-410.461
																4.96	-465.393	-409.851
																4.98	-466.614	-412.292
																5	-463.867	-412.598
																5.02	-463.562	-416.87
																5.04	-462.952	-418.396
																5.06	-450.439	-416.26
																5.08	-446.777	-408.936
																5.1	-446.167	-398.254
																5.12	-446.472	-391.235
																5.14	-446.777	-396.118
																5.16	-446.472	-399.78
																5.18	-450.439	-405.579
																5.2	-447.693	-412.903
																5.22	-442.505	-412.292
																5.24	-437.927	-402.222
																5.26	-434.57	-395.508
																5.28	-436.401	-398.865
																5.3	-439.453	-399.78
																5.32	-431.213	-394.592
																5.34	-422.974	-391.235
																5.36	-424.805	-392.151
																5.38	-429.688	-391.541
																5.4	-431.519	-392.761
																5.42	-426.331	-393.372
																5.44	-419.006	-387.268
																5.46	-416.26	-389.099
																5.48	-418.701	-393.982
																5.5	-424.805	-392.456
																5.52	-422.974	-383.301
																5.54	-418.701	-375.061
																5.56	-424.805	-380.554
																5.58	-427.856	-391.846
																5.6	-419.922	-391.541
																5.62	-410.156	-387.878
																5.64	-413.818	-387.878
																5.66	-419.312	-392.151
																5.68	-419.922	-386.658
																5.7	-417.175	-372.925
																5.72	-419.312	-370.789
																5.74	-420.837	-371.094
																5.76	-416.87	-363.159
																5.78	-415.955	-364.99
																5.8	-416.565	-366.211
																5.82	-419.312	-360.107
																5.84	-417.175	-361.023
																5.86	-401.611	-359.192
																5.88	-390.32	-357.971
																5.9	-386.353	-357.971
																5.92	-387.268	-360.107
																5.94	-388.794	-368.652
																5.96	-380.859	-372.314
																5.98	-379.028	-370.178
																6	-379.639	-364.685
