# Supplementary material for: Microtubule assembly by tau impairs endocytosis and neurotransmission via dynamin sequestration in Alzheimer’s disease synapse model
Source: eLife. 2022 Apr 26;11:e73542. doi: 10.7554/eLife.73542 (PMC9071263; doi:10.7554/eLife.73542)
Supplement: Figure 4—figure supplement 2—source data 1. [file elife-73542-fig4-figsupp2-data1.xlsx]

## Sheet: A
Legend : Data from Figure 4 –figure supplement 2, Data for A
				Endocytic rate							dCm			wave
	Endocytic rate	SEM		Ctrl	SMIFH2			dCm	SEM		Ctrl	SMIFH2		time	Ctrl	SMIFH2
Ctrl	0.0672	0.0182		0.0733138	0.0733676		Ctrl	0.211	0.0451		0.199	0.245		0	-8.10273e-15	-7.50262e-15
SMIFH2	0.0505	0.0102		0.0357526	0.0602773		SMIFH2	0.218	0.0153		0.15	0.243		0.001	9.01357e-15	-8.65887e-15
				0.116009	0.0270636						0.341	0.193		0.002	6.87444e-15	2.61428e-16
				0.043611	0.0411015						0.152	0.19		0.003	6.87444e-15	1.54291e-14
														0.004	3.66164e-15	1.14391e-14
														0.005	-4.6776e-16	1.14391e-14
														0.006	-4.6776e-16	1.05442e-14
														0.007	-3.45994e-16	3.913e-15
														0.008	4.62421e-15	3.913e-15
														0.009	5.97134e-15	3.913e-15
														0.01	4.74414e-15	-1.6853e-15
														0.011	4.74414e-15	-2.33379e-15
														0.012	-1.84423e-15	-2.33379e-15
														0.013	-4.58194e-15	2.67222e-15
														0.014	-8.16501e-15	1.08159e-14
														0.015	-5.09596e-15	1.08159e-14
														0.016	-5.03697e-15	9.62924e-15
														0.017	-7.49148e-15	2.7318e-15
														0.018	1.74776e-15	1.36379e-15
														0.019	-7.32863e-15	2.12845e-15
														0.02	-7.32863e-15	-6.19701e-15
														0.021	-3.88346e-15	2.12845e-15
														0.022	-6.98742e-15	4.72954e-16
														0.023	-8.41118e-15	2.20017e-15
														0.024	-6.38632e-15	6.74783e-15
														0.025	-7.44786e-15	7.04997e-15
														0.026	-7.44786e-15	7.04997e-15
														0.027	-2.56721e-15	4.20099e-15
														0.028	1.69361e-15	1.05371e-15
														0.029	1.69361e-15	1.05371e-15
														0.03	-1.37923e-15	1.05371e-15
														0.031	-5.45257e-15	4.23957e-15
														0.032	-5.45257e-15	6.4343e-15
														0.033	-4.19012e-15	5.43821e-15
														0.034	-2.45149e-15	6.88775e-15
														0.035	-2.45149e-15	5.43821e-15
														0.036	2.64145e-15	-2.31349e-16
														0.037	7.59493e-16	-1.93997e-15
														0.038	-5.20849e-15	-5.71959e-15
														0.039	-5.96623e-15	-1.90207e-15
														0.04	-5.96623e-15	-1.90207e-15
														0.041	-6.20334e-15	-5.06192e-16
														0.042	-6.61185e-15	-1.7382e-15
														0.043	-6.61185e-15	-4.22532e-15
														0.044	-6.61185e-15	-3.6127e-15
														0.045	-1.04512e-15	-3.6127e-15
														0.046	1.71288e-15	3.35073e-15
														0.047	3.76929e-15	8.10721e-15
														0.048	8.71984e-16	8.10721e-15
														0.049	8.71984e-16	5.36248e-15
														0.05	9.03869e-16	-4.49888e-16
														0.051	-2.12257e-15	-4.95375e-15
														0.052	1.04504e-15	-8.24934e-15
														0.053	-2.70738e-15	-8.24934e-15
														0.054	-4.61524e-15	-8.23343e-15
														0.055	-5.41678e-16	-7.92891e-15
														0.056	-3.84784e-16	-2.99328e-15
														0.057	-2.15096e-16	-2.99328e-15
														0.058	-2.15096e-16	-8.2631e-16
														0.059	-6.78145e-15	1.45082e-15
														0.06	-6.78145e-15	2.4295e-15
														0.061	-1.00726e-14	7.33454e-16
														0.062	-1.63332e-15	4.32858e-15
														0.063	2.9212e-15	7.33454e-16
														0.064	-1.8817e-15	-1.73801e-15
														0.065	9.61192e-16	-2.84946e-15
														0.066	2.06047e-16	-2.84946e-15
														0.067	-2.4758e-16	2.25596e-16
														0.068	2.59531e-15	6.34444e-15
														0.069	5.20792e-15	8.05743e-15
														0.07	-3.42976e-17	8.32557e-15
														0.071	8.64767e-15	6.12945e-15
														0.072	6.40121e-15	2.90182e-15
														0.073	-2.28075e-15	3.16997e-15
														0.074	4.44142e-15	3.51057e-15
														0.075	4.44142e-15	6.35092e-15
														0.076	6.20156e-16	7.63817e-15
														0.077	5.73998e-15	6.91028e-15
														0.078	4.93204e-15	-1.70658e-15
														0.079	-1.87781e-16	-1.59916e-15
														0.08	4.93204e-15	-8.13959e-15
														0.081	1.04237e-15	-4.38991e-15
														0.082	-1.92118e-15	-3.79551e-15
														0.083	-1.92118e-15	-3.79551e-15
														0.084	-1.92118e-15	-2.49041e-16
														0.085	-1.01571e-17	7.04703e-16
														0.086	7.21473e-16	7.04703e-16
														0.087	3.28236e-15	-3.39853e-15
														0.088	3.28236e-15	-3.39853e-15
														0.089	2.26907e-15	-7.24914e-15
														0.09	6.2945e-15	-3.94342e-16
														0.091	7.40484e-15	-2.29897e-16
														0.092	3.37942e-15	-2.37589e-15
														0.093	-2.10826e-15	-6.9425e-16
														0.094	-6.93447e-15	-6.9425e-16
														0.095	-6.93447e-15	8.26195e-15
														0.096	-3.10214e-15	9.00796e-15
														0.097	-3.10214e-15	1.3568e-14
														0.098	-4.48217e-16	8.30197e-15
														0.099	-4.48217e-16	9.15427e-16
														0.1	2.27314e-15	3.1204e-16
														0.101	2.27314e-15	-1.43925e-15
														0.102	-1.4495e-16	-3.77151e-15
														0.103	5.34621e-15	7.83836e-16
														0.104	5.58334e-15	-1.25547e-15
														0.105	5.76755e-15	-3.05148e-15
														0.106	9.39963e-15	-3.05148e-15
														0.107	2.56266e-15	-3.94838e-15
														0.108	2.25475e-15	-3.94838e-15
														0.109	2.25475e-15	-3.50117e-15
														0.11	1.70073e-15	6.91741e-16
														0.111	-2.11154e-15	5.2785e-16
														0.112	-4.29718e-15	2.34306e-15
														0.113	6.05155e-16	8.58511e-15
														0.114	-5.78589e-15	7.0621e-15
														0.115	-1.63122e-15	8.40686e-15
														0.116	-1.02807e-16	8.40686e-15
														0.117	-6.52086e-15	6.64993e-15
														0.118	-1.02807e-16	1.17045e-14
														0.119	-2.26296e-15	1.24364e-14
														0.12	-2.07309e-16	1.22873e-14
														0.121	-2.07309e-16	1.22873e-14
														0.122	-7.76636e-15	9.21418e-15
														0.123	-2.04968e-15	8.45401e-15
														0.124	-1.16259e-14	8.45401e-15
														0.125	-4.51276e-15	6.00184e-15
														0.126	5.06346e-15	1.03201e-14
														0.127	-6.5212e-16	8.38379e-15
														0.128	8.64979e-15	3.7483e-15
														0.129	1.32815e-14	3.27836e-15
														0.13	4.66797e-15	3.27836e-15
														0.131	5.95817e-15	-2.1476e-15
														0.132	-1.97764e-15	-4.60866e-15
														0.133	-1.97764e-15	3.30675e-15
														0.134	1.44009e-15	-3.25753e-15
														0.135	-5.39866e-16	3.30675e-15
														0.136	5.14233e-15	8.19072e-15
														0.137	3.56992e-15	1.62644e-15
														0.138	9.89636e-16	1.01772e-14
														0.139	9.89636e-16	8.14921e-15
														0.14	-6.81226e-16	1.20325e-14
														0.141	-6.56496e-16	1.20325e-14
														0.142	-6.56496e-16	2.82026e-15
														0.143	-9.27645e-16	6.38057e-16
														0.144	-9.27645e-16	4.3956e-16
														0.145	-2.91899e-15	3.76407e-15
														0.146	-5.36126e-15	7.82583e-15
														0.147	-5.36126e-15	1.17651e-14
														0.148	-8.84691e-16	1.17651e-14
														0.149	-1.65263e-15	1.10884e-14
														0.15	1.48983e-15	1.01182e-14
														0.151	-4.241e-16	4.56427e-15
														0.152	-4.57757e-15	1.01182e-14
														0.153	-4.241e-16	1.02513e-14
														0.154	4.91844e-16	7.12298e-15
														0.155	5.04539e-16	1.12584e-14
														0.156	5.04539e-16	9.57605e-15
														0.157	5.04539e-16	8.66323e-15
														0.158	-2.56971e-15	8.66323e-15
														0.159	-1.54025e-15	6.78695e-15
														0.16	4.39652e-15	3.41559e-15
														0.161	-1.01343e-15	1.98514e-15
														0.162	3.54998e-15	4.90628e-15
														0.163	3.59946e-16	1.98514e-15
														0.164	3.59946e-16	2.93299e-16
														0.165	2.02453e-15	-1.49295e-15
														0.166	4.86487e-16	-3.05368e-15
														0.167	4.86487e-16	-1.65741e-15
														0.168	4.86487e-16	-1.80113e-15
														0.169	1.66427e-15	-2.86639e-15
														0.17	3.19051e-15	-2.17122e-16
														0.171	7.96924e-15	-3.74902e-16
														0.172	4.09908e-15	-3.74902e-16
														0.173	4.09908e-15	1.39763e-15
														0.174	-1.08947e-15	-3.0754e-15
														0.175	-1.08947e-15	-3.0754e-15
														0.176	-2.83579e-15	5.90669e-17
														0.177	-2.63455e-15	-2.13354e-15
														0.178	-2.63455e-15	-2.13354e-15
														0.179	-3.14444e-15	-3.52367e-15
														0.18	-3.14444e-15	-3.52367e-15
														0.181	1.158e-15	5.04641e-17
														0.182	4.02767e-15	-7.42008e-16
														0.183	4.02767e-15	5.5543e-15
														0.184	1.56538e-16	8.13109e-15
														0.185	-5.40639e-15	8.13109e-15
														0.186	-5.40639e-15	8.13109e-15
														0.187	-6.87991e-15	4.6305e-15
														0.188	9.75909e-18	-1.32733e-15
														0.189	4.13397e-15	-6.45573e-15
														0.19	4.13397e-15	-1.32733e-15
														0.191	4.13397e-15	7.61882e-16
														0.192	4.3999e-16	-2.9356e-15
														0.193	1.78517e-15	4.87595e-15
														0.194	-3.41456e-15	7.49372e-15
														0.195	-3.84801e-15	4.84098e-15
														0.196	2.27612e-16	8.02324e-15
														0.197	-3.72581e-15	3.42375e-15
														0.198	-3.69935e-15	2.05943e-15
														0.199	-3.49465e-15	1.36128e-15
														0.2	-4.42868e-15	-2.33147e-15
														0.201	-4.42868e-15	-2.33147e-15
														0.202	-2.13656e-15	-2.33147e-15
														0.203	-2.13656e-15	-1.13849e-14
														0.204	1.62194e-15	-7.09078e-15
														0.205	-1.83558e-15	5.1473e-15
														0.206	-2.1914e-15	-5.52924e-16
														0.207	-2.1914e-15	2.33595e-15
														0.208	-2.1914e-15	-3.43144e-15
														0.209	2.94371e-15	-3.43144e-15
														0.21	3.96417e-15	-2.90379e-15
														0.211	3.96417e-15	-1.60097e-15
														0.212	-6.0367e-16	8.42427e-16
														0.213	-2.35606e-15	-6.27021e-16
														0.214	-2.35606e-15	1.24921e-15
														0.215	-2.12382e-15	-6.27021e-16
														0.216	-1.12114e-15	1.00041e-15
														0.217	-1.12114e-15	2.24385e-15
														0.218	1.28005e-15	3.64212e-15
														0.219	1.28005e-15	4.77753e-15
														0.22	3.37756e-15	4.77753e-15
														0.221	8.45737e-15	4.77753e-15
														0.222	8.57036e-15	-1.03349e-15
														0.223	8.57036e-15	-1.386e-15
														0.224	1.31499e-15	-8.16816e-15
														0.225	1.06249e-15	-3.41797e-15
														0.226	-1.99355e-15	-3.33527e-15
														0.227	6.87686e-16	-3.33527e-15
														0.228	4.31727e-15	-2.95099e-15
														0.229	5.0644e-15	-2.02244e-16
														0.23	5.86921e-15	7.11101e-15
														0.231	5.86921e-15	-2.02244e-16
														0.232	6.30117e-15	3.04372e-15
														0.233	3.05399e-15	-5.38613e-15
														0.234	-2.82856e-15	-1.37112e-14
														0.235	-6.95882e-15	-1.29377e-14
														0.236	-6.95882e-15	-1.29377e-14
														0.237	-6.95882e-15	-1.90425e-15
														0.238	-8.54392e-15	5.87116e-15
														0.239	-2.58731e-15	5.87116e-15
														0.24	-7.68001e-15	3.76937e-15
														0.241	-7.68001e-15	3.57416e-15
														0.242	-2.98909e-15	1.23675e-15
														0.243	-2.98909e-15	-8.11827e-16
														0.244	1.20364e-15	2.08914e-15
														0.245	1.20364e-15	2.08914e-15
														0.246	-8.84636e-16	5.28099e-15
														0.247	-9.92723e-16	5.42687e-15
														0.248	-5.30536e-15	5.42687e-15
														0.249	-7.41543e-15	4.26642e-15
														0.25	-8.05943e-15	4.26642e-15
														0.251	-8.05943e-15	7.93618e-15
														0.252	-5.40432e-15	7.93618e-15
														0.253	-5.40432e-15	7.4063e-15
														0.254	-7.27684e-15	3.8786e-15
														0.255	-7.27684e-15	3.32796e-15
														0.256	-5.64185e-15	3.32796e-15
														0.257	-1.95682e-16	4.42009e-15
														0.258	-1.95682e-16	6.91891e-15
														0.259	-1.92508e-15	6.43479e-15
														0.26	-1.18771e-15	7.08826e-15
														0.261	-1.18771e-15	3.55467e-15
														0.262	-9.56876e-16	3.55467e-15
														0.263	4.18962e-17	1.13385e-14
														0.264	7.98997e-15	2.04098e-14
														0.265	8.26547e-15	2.04098e-14
														0.266	8.26547e-15	1.18649e-14
														0.267	4.5928e-17	5.74924e-15
														0.268	-2.13537e-15	5.74924e-15
														0.269	-2.13537e-15	3.27739e-15
														0.27	-1.60703e-15	2.51753e-15
														0.271	7.0157e-16	1.42625e-15
														0.272	5.30315e-15	1.42625e-15
														0.273	7.0157e-16	5.8955e-15
														0.274	3.67728e-15	5.8955e-15
														0.275	1.10285e-15	7.23869e-15
														0.276	-4.66673e-15	7.6692e-15
														0.277	-5.91822e-15	4.02147e-15
														0.278	-5.91822e-15	7.6692e-15
														0.279	-2.75473e-15	6.61414e-15
														0.28	-2.2652e-15	2.90928e-15
														0.281	4.02177e-15	7.2319e-15
														0.282	6.07309e-15	2.90928e-15
														0.283	2.31156e-15	-2.67875e-15
														0.284	2.31156e-15	-3.2147e-15
														0.285	-4.78518e-16	-3.50969e-15
														0.286	-1.20135e-15	-1.79414e-16
														0.287	-3.88366e-15	5.52474e-17
														0.288	-7.24436e-15	-2.39744e-16
														0.289	-7.37641e-15	-1.91064e-15
														0.29	-6.48715e-15	-2.29818e-15
														0.291	-7.12367e-15	-2.29818e-15
														0.292	-5.20181e-15	8.76099e-16
														0.293	-2.67996e-15	8.76099e-16
														0.294	-4.5091e-15	5.26611e-15
														0.295	-1.06676e-15	5.26611e-15
														0.296	-1.79144e-15	1.80911e-15
														0.297	-2.22218e-15	6.29761e-15
														0.298	-7.65223e-16	3.8745e-15
														0.299	-1.00222e-15	-6.14007e-16
														0.3	5.52411e-16	-3.31198e-15
														0.301	1.411e-15	-6.12662e-15
														0.302	2.80301e-15	-6.12662e-15
														0.303	3.71429e-15	4.24849e-15
														0.304	3.71429e-15	1.09974e-14
														0.305	1.26997e-16	1.09974e-14
														0.306	-2.3196e-15	1.22509e-14
														0.307	-2.3196e-15	8.1576e-15
														0.308	-2.3196e-15	2.36912e-15
														0.309	-3.14012e-15	-4.76966e-15
														0.31	-2.25638e-15	-7.05729e-15
														0.311	-2.34159e-15	-5.6163e-15
														0.312	2.87245e-15	-5.6163e-15
														0.313	2.87245e-15	-4.09721e-15
														0.314	2.87245e-15	-2.88976e-15
														0.315	-7.1527e-16	-1.44634e-15
														0.316	-2.0291e-15	3.96647e-15
														0.317	-2.0291e-15	8.36772e-15
														0.318	-2.0291e-15	8.36772e-15
														0.319	5.96538e-15	4.34398e-15
														0.32	4.54704e-15	4.20441e-15
														0.321	9.70687e-15	-1.89782e-15
														0.322	8.471e-15	1.72909e-15
														0.323	8.44737e-15	4.29173e-16
														0.324	8.44737e-15	1.84262e-15
														0.325	3.63341e-16	5.39151e-15
														0.326	2.66565e-15	-2.07232e-15
														0.327	-4.57387e-16	5.32164e-15
														0.328	5.57458e-15	-2.00076e-16
														0.329	6.14336e-15	7.0553e-16
														0.33	5.07238e-15	7.0553e-16
														0.331	1.03428e-15	7.0553e-16
														0.332	-3.61716e-15	-1.1044e-15
														0.333	-3.61716e-15	-1.69759e-15
														0.334	-3.14769e-15	4.20233e-15
														0.335	-3.14769e-15	2.39867e-16
														0.336	-1.67621e-15	4.48379e-16
														0.337	2.30326e-15	3.43825e-15
														0.338	1.741e-15	-6.13732e-17
														0.339	3.60171e-15	3.43825e-15
														0.34	1.74486e-17	3.71828e-15
														0.341	-3.35051e-15	9.52555e-16
														0.342	-1.4898e-15	2.48717e-15
														0.343	-9.39699e-15	9.52555e-16
														0.344	-6.23187e-15	2.48717e-15
														0.345	5.09339e-15	9.10174e-16
														0.346	4.05603e-15	-1.54937e-15
														0.347	4.05603e-15	-1.54937e-15
														0.348	3.97298e-15	-4.88433e-15
														0.349	1.41677e-15	-4.47763e-15
														0.35	-8.30601e-18	-3.38207e-15
														0.351	-1.12448e-15	3.88095e-15
														0.352	3.00591e-16	3.88095e-15
														0.353	-1.12448e-15	3.88095e-15
														0.354	-2.89975e-15	3.70947e-15
														0.355	-6.37623e-15	5.39775e-16
														0.356	-7.46965e-15	5.67659e-15
														0.357	-9.0748e-15	3.19722e-16
														0.358	-9.0748e-15	4.36908e-15
														0.359	-5.64633e-15	3.52084e-15
														0.36	-2.4527e-15	3.52084e-15
														0.361	2.49135e-16	8.19383e-15
														0.362	4.04591e-15	1.13396e-14
														0.363	4.04591e-15	1.16575e-14
														0.364	1.4498e-15	8.34149e-15
														0.365	-6.86484e-15	6.56435e-15
														0.366	-6.86484e-15	4.80464e-15
														0.367	-2.69911e-15	4.80464e-15
														0.368	1.6942e-15	6.43675e-15
														0.369	1.6942e-15	8.12064e-15
														0.37	5.02422e-15	8.12064e-15
														0.371	1.8511e-15	8.92368e-15
														0.372	2.02132e-15	7.22933e-15
														0.373	2.02132e-15	1.23004e-15
														0.374	-1.61823e-15	3.81703e-15
														0.375	-5.42583e-16	3.81703e-15
														0.376	-4.34325e-15	3.81703e-15
														0.377	-7.16163e-15	1.73757e-16
														0.378	-7.16163e-15	-8.93668e-16
														0.379	-7.16163e-15	-8.93668e-16
														0.38	-1.97122e-15	5.46318e-15
														0.381	3.18981e-15	8.82494e-15
														0.382	3.18981e-15	1.04427e-14
														0.383	2.62615e-15	1.03578e-14
														0.384	1.45847e-15	1.03578e-14
														0.385	1.27383e-15	8.32446e-15
														0.386	1.27383e-15	5.98622e-15
														0.387	-1.61133e-15	5.41757e-15
														0.388	-1.75596e-15	5.41757e-15
														0.389	-5.56573e-15	1.93689e-15
														0.39	-2.92895e-15	2.61174e-15
														0.391	-4.57802e-15	6.73092e-15
														0.392	-4.57802e-15	-8.72897e-16
														0.393	-6.36358e-15	8.01352e-15
														0.394	-5.83308e-15	8.01352e-15
														0.395	4.62525e-15	6.19908e-15
														0.396	7.00097e-15	7.27148e-15
														0.397	8.90634e-15	8.69821e-15
														0.398	5.77658e-15	5.57535e-15
														0.399	3.37833e-15	5.64426e-15
														0.4	-3.59958e-15	5.64426e-15
														0.401	-9.98954e-15	2.57461e-15
														0.402	-9.98954e-15	2.57461e-15
														0.403	-9.98954e-15	-1.38173e-15
														0.404	-1.10761e-14	-3.79248e-15
														0.405	-7.82795e-15	-1.42299e-15
														0.406	-3.04065e-15	-3.76061e-15
														0.407	-1.72193e-15	-3.76061e-15
														0.408	3.31268e-15	-3.03759e-15
														0.409	-1.72193e-15	-3.44985e-15
														0.41	7.01709e-16	-3.44985e-15
														0.411	3.89751e-15	-8.93262e-16
														0.412	-2.61701e-16	1.54831e-15
														0.413	2.84367e-15	4.09917e-15
														0.414	4.17885e-16	5.53193e-15
														0.415	4.17885e-16	4.09917e-15
														0.416	-1.64177e-15	5.07352e-15
														0.417	-3.88964e-15	4.65033e-15
														0.418	1.45397e-15	-2.46174e-15
														0.419	-3.96432e-16	3.54721e-15
														0.42	-3.96432e-16	3.54721e-15
														0.421	-3.69056e-15	-6.67438e-16
														0.422	-3.69056e-15	-6.67438e-16
														0.423	-2.99492e-15	-3.23453e-15
														0.424	2.89349e-15	-3.23453e-15
														0.425	3.57893e-15	-2.11794e-15
														0.426	3.57893e-15	-2.11794e-15
														0.427	2.89784e-15	-2.33839e-15
														0.428	2.89784e-15	-2.33839e-15
														0.429	5.6436e-15	-9.22035e-16
														0.43	1.29505e-14	-9.22035e-16
														0.431	1.29505e-14	-2.13756e-15
														0.432	6.7856e-15	-3.63889e-15
														0.433	7.36902e-15	-3.63889e-15
														0.434	4.5567e-15	-5.6405e-16
														0.435	2.04928e-15	2.07962e-15
														0.436	3.42972e-16	2.4443e-15
														0.437	-8.4401e-16	2.4443e-15
														0.438	-8.4401e-16	1.65448e-15
														0.439	-3.29885e-15	1.75088e-15
														0.44	-3.29885e-15	3.70079e-15
														0.441	-4.55955e-15	7.74382e-15
														0.442	-3.31806e-16	7.74382e-15
														0.443	2.98976e-15	7.7413e-15
														0.444	-3.31806e-16	1.08162e-14
														0.445	2.98976e-15	6.57343e-15
														0.446	-2.30961e-16	8.0799e-15
														0.447	3.88341e-16	6.36608e-15
														0.448	3.91927e-15	3.39372e-15
														0.449	-4.04095e-16	7.90066e-16
														0.45	-1.9133e-15	-5.81191e-15
														0.451	-3.92047e-15	-9.10468e-15
														0.452	-5.06355e-15	-9.10468e-15
														0.453	-2.22791e-15	-4.01778e-15
														0.454	-1.08484e-15	8.56441e-16
														0.455	-2.22791e-15	8.56441e-16
														0.456	1.00583e-15	-2.44231e-15
														0.457	-1.04927e-16	-5.28939e-15
														0.458	-6.14709e-16	-5.28939e-15
														0.459	-1.80028e-15	-3.86458e-15
														0.46	-6.17243e-15	-4.00501e-15
														0.461	-2.09789e-15	-1.25036e-15
														0.462	1.53062e-15	6.1108e-16
														0.463	7.95203e-15	6.1108e-16
														0.464	7.95203e-15	4.84827e-15
														0.465	3.35275e-15	7.59312e-15
														0.466	-8.22402e-16	9.33079e-15
														0.467	-8.22402e-16	8.01721e-15
														0.468	2.46737e-16	5.89568e-15
														0.469	7.16829e-15	4.45442e-15
														0.47	9.58195e-15	1.87498e-15
														0.471	9.58195e-15	4.45442e-15
														0.472	4.68548e-15	3.82957e-15
														0.473	4.66045e-15	4.11306e-15
														0.474	4.66045e-15	5.43227e-15
														0.475	4.66045e-15	4.11306e-15
														0.476	3.52031e-15	2.92884e-15
														0.477	-1.04992e-15	-1.42601e-15
														0.478	-1.97094e-15	-1.42601e-15
														0.479	-1.97094e-15	-3.39614e-15
														0.48	-1.97094e-15	-2.41074e-15
														0.481	1.74484e-15	1.91345e-15
														0.482	4.99314e-16	-2.41074e-15
														0.483	2.32089e-15	-9.69997e-15
														0.484	2.03315e-15	-8.95244e-15
														0.485	2.03315e-15	-1.35548e-14
														0.486	5.4021e-15	-5.88216e-15
														0.487	5.4021e-15	-1.54292e-15
														0.488	6.7746e-15	-1.43425e-15
														0.489	6.52654e-15	2.96405e-15
														0.49	5.74517e-15	2.5923e-15
														0.491	5.74517e-15	8.2131e-15
														0.492	-1.35071e-15	3.60528e-15
														0.493	-1.62273e-15	-4.26825e-16
														0.494	-1.62273e-15	3.8693e-15
														0.495	3.82322e-15	1.76195e-15
														0.496	3.82322e-15	1.76195e-15
														0.497	4.2632e-15	4.25987e-15
														0.498	5.06248e-15	1.1472e-15
														0.499	1.73236e-15	-1.44023e-15
														0.5	1.73236e-15	3.77665e-15
														0.501	-3.25344e-15	3.90063e-15
														0.502	-3.71238e-15	4.74726e-15
														0.503	-3.71238e-15	7.37701e-15
														0.504	-1.68589e-15	4.46488e-15
														0.505	-1.68589e-15	2.0619e-15
														0.506	-1.569e-15	2.0108e-15
														0.507	-3.47773e-15	1.18581e-15
														0.508	-3.47773e-15	2.0108e-15
														0.509	-2.26288e-15	3.03706e-15
														0.51	-9.4296e-16	4.9361e-15
														0.511	-5.12968e-16	6.72139e-15
														0.512	-9.4296e-16	6.72139e-15
														0.513	-3.99162e-15	6.40813e-15
														0.514	-3.2265e-15	6.20178e-15
														0.515	-1.57222e-16	6.20178e-15
														0.516	3.87667e-15	6.54564e-15
														0.517	5.11494e-15	1.0242e-14
														0.518	7.21363e-15	1.29865e-14
														0.519	2.11442e-15	9.29014e-15
														0.52	7.20324e-15	8.50123e-15
														0.521	1.83481e-15	9.46673e-16
														0.522	-7.40616e-15	3.00007e-16
														0.523	-8.78386e-16	3.00007e-16
														0.524	-1.69912e-15	3.10036e-15
														0.525	1.16654e-15	3.35489e-15
														0.526	1.16654e-15	3.35489e-15
														0.527	-3.46452e-15	1.19671e-15
														0.528	-3.46452e-15	1.19671e-15
														0.529	-6.31868e-15	-3.77497e-15
														0.53	-4.38814e-15	8.50971e-16
														0.531	-1.22877e-15	8.31253e-15
														0.532	-5.17178e-15	1.6135e-15
														0.533	1.14944e-15	8.31253e-15
														0.534	-4.78271e-16	6.57919e-15
														0.535	-4.81366e-15	2.63971e-15
														0.536	-1.24717e-15	5.82544e-15
														0.537	-1.24717e-15	2.63971e-15
														0.538	-1.24717e-15	-2.53207e-16
														0.539	-1.42801e-15	7.62553e-16
														0.54	-9.62554e-16	-1.14122e-15
														0.541	-3.06373e-15	-1.84318e-15
														0.542	-2.54384e-15	-2.84828e-15
														0.543	-7.73011e-16	-2.84828e-15
														0.544	-7.73011e-16	2.29903e-15
														0.545	2.75488e-15	2.45653e-15
														0.546	2.75488e-15	7.32668e-15
														0.547	-8.9887e-16	6.35662e-15
														0.548	-8.9887e-16	1.48647e-15
														0.549	-1.21664e-15	3.30606e-15
														0.55	2.72585e-15	3.30606e-15
														0.551	2.72585e-15	3.99482e-15
														0.552	2.72585e-15	7.34517e-15
														0.553	4.4106e-15	7.89721e-15
														0.554	1.77991e-15	7.34517e-15
														0.555	1.77991e-15	7.75851e-15
														0.556	-5.94599e-16	9.394e-15
														0.557	-5.94599e-16	7.92282e-15
														0.558	1.01079e-15	1.05413e-14
														0.559	1.79977e-15	7.92282e-15
														0.56	2.44097e-15	7.99355e-15
														0.561	-8.04522e-17	6.92153e-15
														0.562	-5.44701e-16	3.02369e-15
														0.563	-1.52123e-15	1.98679e-15
														0.564	-3.01722e-15	-2.46264e-15
														0.565	-2.74052e-15	-8.93039e-15
														0.566	-6.87772e-15	-8.93039e-15
														0.567	-4.29666e-15	-8.03077e-15
														0.568	4.25173e-15	-3.94403e-15
														0.569	4.37556e-15	-3.94403e-15
														0.57	4.37556e-15	-3.17958e-15
														0.571	3.64644e-15	-6.40471e-16
														0.572	-7.73302e-16	1.27331e-15
														0.573	-6.87899e-15	6.69675e-15
														0.574	-7.73302e-16	6.69675e-15
														0.575	-5.03003e-16	4.74028e-15
														0.576	5.35918e-15	9.25485e-16
														0.577	5.96417e-15	-1.22249e-16
														0.578	5.96417e-15	1.13369e-16
														0.579	6.54987e-15	-4.71756e-16
														0.58	4.15833e-15	-4.71756e-16
														0.581	9.73718e-16	5.64049e-15
														0.582	9.73718e-16	5.85373e-15
														0.583	9.73718e-16	1.04869e-14
														0.584	1.22873e-15	4.82347e-15
														0.585	5.72916e-15	3.21022e-15
														0.586	6.20621e-15	7.84336e-15
														0.587	6.20621e-15	5.43434e-15
														0.588	6.20621e-15	5.43434e-15
														0.589	3.49344e-15	4.81816e-15
														0.59	4.09377e-15	4.81816e-15
														0.591	2.73613e-15	4.40212e-15
														0.592	2.73613e-15	4.40212e-15
														0.593	1.20558e-15	1.43149e-15
														0.594	-4.3245e-15	-1.66743e-15
														0.595	-4.3245e-15	-3.56057e-15
														0.596	-2.16498e-15	-1.66743e-15
														0.597	-6.77988e-15	1.36126e-15
														0.598	-3.95824e-15	1.44483e-16
														0.599	-3.95824e-15	1.57788e-15
														0.6	-2.35524e-15	-5.59985e-15
														0.601	2.21045e-15	-5.59985e-15
														0.602	6.81918e-15	8.97729e-16
														0.603	6.81918e-15	2.52455e-15
														0.604	2.70302e-15	4.31534e-15
														0.605	7.12288e-15	5.2223e-15
														0.606	5.7659e-15	4.80583e-15
														0.607	7.41596e-15	6.96482e-15
														0.608	7.41596e-15	6.89352e-15
														0.609	5.02313e-15	6.89352e-15
														0.61	5.02313e-15	9.30334e-15
														0.611	5.53348e-15	2.90234e-15
														0.612	7.0377e-15	9.44298e-15
														0.613	8.2042e-15	4.23768e-15
														0.614	6.69998e-15	-2.07451e-15
														0.615	4.05887e-15	-5.20717e-16
														0.616	3.0162e-15	-1.97992e-15
														0.617	-5.78362e-16	-3.19801e-15
														0.618	4.67036e-16	-1.64422e-15
														0.619	4.67036e-16	-1.37048e-15
														0.62	4.67036e-16	-1.82355e-15
														0.621	4.7156e-15	-8.32945e-16
														0.622	4.11073e-15	-8.32945e-16
														0.623	4.11073e-15	-5.12756e-15
														0.624	-3.29936e-16	3.10877e-15
														0.625	-3.29936e-16	1.01274e-14
														0.626	2.26598e-15	1.10978e-14
														0.627	5.98176e-15	1.10978e-14
														0.628	5.98176e-15	9.78211e-15
														0.629	4.74502e-15	9.33211e-15
														0.63	3.41655e-15	4.00452e-15
														0.631	3.41655e-15	9.33211e-15
														0.632	1.98162e-15	3.09799e-15
														0.633	1.57971e-15	3.32705e-15
														0.634	6.15614e-15	4.63165e-15
														0.635	6.15614e-15	2.42835e-16
														0.636	1.15153e-14	7.22947e-15
														0.637	1.19087e-14	3.12633e-15
														0.638	1.19087e-14	5.41131e-15
														0.639	9.15582e-15	7.75175e-15
														0.64	1.46353e-15	7.00356e-15
														0.641	-4.23634e-15	7.00356e-15
														0.642	-1.08991e-16	8.66295e-15
														0.643	-2.23207e-15	5.55545e-15
														0.644	-2.23207e-15	4.29872e-15
														0.645	1.29289e-15	2.86545e-15
														0.646	4.21493e-15	2.86545e-15
														0.647	9.38756e-15	6.31186e-15
														0.648	9.38756e-15	3.54445e-15
														0.649	8.46285e-15	3.07117e-15
														0.65	5.72828e-15	1.97816e-15
														0.651	-2.4646e-15	-1.23394e-15
														0.652	-2.4646e-15	-2.79763e-15
														0.653	4.27069e-15	2.60603e-16
														0.654	2.75304e-15	5.00814e-16
														0.655	2.92424e-15	6.39021e-16
														0.656	9.26812e-16	1.42411e-15
														0.657	9.26812e-16	5.24954e-16
														0.658	-4.80189e-15	-3.45367e-15
														0.659	-3.26502e-15	-2.13607e-15
														0.66	5.5026e-15	1.05747e-15
														0.661	6.48587e-15	1.32816e-15
														0.662	6.48587e-15	1.32816e-15
														0.663	7.77456e-15	5.97882e-15
														0.664	2.00964e-15	5.90435e-15
														0.665	-1.14072e-15	4.16429e-15
														0.666	-1.24599e-15	4.16429e-15
														0.667	-1.24599e-15	3.22229e-15
														0.668	3.22494e-15	3.22229e-15
														0.669	8.25728e-15	3.48409e-15
														0.67	8.25728e-15	7.34567e-15
														0.671	2.10715e-15	9.36302e-15
														0.672	-3.17388e-15	5.50144e-15
														0.673	-3.17388e-15	9.13121e-15
														0.674	-3.17388e-15	5.0474e-15
														0.675	-3.7202e-15	-6.56712e-16
														0.676	-1.82263e-15	-4.34738e-15
														0.677	2.33573e-15	-4.34738e-15
														0.678	1.36848e-14	-8.03056e-15
														0.679	1.36848e-14	-1.31041e-15
														0.68	6.68936e-15	4.17894e-15
														0.681	3.44305e-15	4.8174e-15
														0.682	1.3526e-15	4.8174e-15
														0.683	1.3526e-15	3.40702e-15
														0.684	1.16341e-15	3.40702e-15
														0.685	-2.58837e-16	1.60819e-15
														0.686	-2.58837e-16	1.60819e-15
														0.687	-3.98805e-15	-1.47208e-15
														0.688	-5.35207e-15	-1.47208e-15
														0.689	-1.4986e-15	-1.44272e-15
														0.69	-3.403e-15	-2.96004e-15
														0.691	-3.403e-15	1.46054e-15
														0.692	5.0192e-15	-4.96934e-15
														0.693	4.37628e-15	-4.46037e-15
														0.694	8.39998e-15	2.72901e-16
														0.695	8.39998e-15	-8.64367e-15
														0.696	2.43882e-15	-6.84675e-16
														0.697	2.43882e-15	-3.86343e-15
														0.698	3.21122e-15	-3.1244e-15
														0.699	3.21122e-15	2.26283e-15
														0.7	6.60717e-15	4.53666e-15
														0.701	-2.65549e-15	4.53666e-15
														0.702	-7.85662e-15	2.15193e-15
														0.703	1.04381e-15	-3.29438e-15
														0.704	3.06488e-15	-3.29438e-15
														0.705	3.06488e-15	1.63271e-15
														0.706	2.52062e-15	2.7634e-15
														0.707	-8.21966e-16	2.7634e-15
														0.708	-1.03371e-15	2.52829e-15
														0.709	2.35074e-15	2.01034e-16
														0.71	2.35074e-15	6.35405e-16
														0.711	2.35074e-15	1.12663e-15
														0.712	-6.6864e-16	-6.15176e-15
														0.713	2.76254e-15	1.10519e-14
														0.714	6.04443e-15	-6.15176e-15
														0.715	4.83887e-16	-9.45047e-15
														0.716	3.67914e-15	-2.54728e-15
														0.717	1.07403e-15	-2.54728e-15
														0.718	-9.43776e-16	-1.83782e-15
														0.719	1.63706e-15	4.51547e-15
														0.72	7.27963e-16	7.57071e-15
														0.721	7.74049e-16	1.21741e-15
														0.722	7.74049e-16	1.12434e-15
														0.723	-1.42839e-15	-6.18614e-15
														0.724	-4.77673e-15	-6.18614e-15
														0.725	-4.77673e-15	-2.02533e-15
														0.726	-1.89979e-15	5.22551e-15
														0.727	-4.10831e-15	5.22551e-15
														0.728	-3.05229e-15	2.2155e-15
														0.729	-4.96795e-15	2.55255e-15
														0.73	-4.96795e-15	2.55255e-15
														0.731	-7.02918e-16	-9.78353e-16
														0.732	5.60476e-15	-2.66594e-15
														0.733	8.40841e-15	-1.49883e-15
														0.734	8.40841e-15	-8.85544e-15
														0.735	7.81059e-15	-1.49883e-15
														0.736	4.94298e-15	5.13679e-15
														0.737	4.24682e-15	1.31766e-15
														0.738	2.72233e-15	1.31766e-15
														0.739	2.19899e-15	-1.30746e-15
														0.74	-2.17252e-16	-1.30746e-15
														0.741	-2.17252e-16	5.01154e-16
														0.742	5.01229e-15	3.76204e-15
														0.743	2.4203e-15	9.89446e-15
														0.744	5.92205e-15	9.89446e-15
														0.745	7.17724e-15	1.20905e-14
														0.746	3.67549e-15	7.73172e-15
														0.747	8.02369e-15	1.87598e-15
														0.748	5.84055e-15	6.57982e-15
														0.749	3.28098e-17	5.62585e-15
														0.75	5.19402e-16	2.71966e-15
														0.751	-3.1105e-15	7.42349e-15
														0.752	-3.1105e-15	5.90764e-15
														0.753	-2.90927e-15	3.98803e-15
														0.754	-2.99741e-15	3.98803e-15
														0.755	-1.57754e-15	-8.92356e-16
														0.756	5.21272e-16	-3.65712e-15
														0.757	1.51376e-15	-5.17188e-15
														0.758	1.51376e-15	-4.41398e-15
														0.759	3.28817e-15	-3.17119e-15
														0.76	2.89038e-15	3.86808e-16
														0.761	-8.74074e-16	3.86808e-16
														0.762	-5.51661e-17	-5.2945e-15
														0.763	-2.53908e-15	-1.52096e-15
														0.764	-1.59928e-15	-1.52096e-15
														0.765	8.8463e-16	5.82056e-15
														0.766	-1.58127e-15	7.32603e-15
														0.767	-9.72812e-16	7.32603e-15
														0.768	7.57251e-16	5.22753e-15
														0.769	-1.86662e-15	5.22753e-15
														0.77	-1.86662e-15	3.60846e-15
														0.771	-2.73321e-15	3.60846e-15
														0.772	-2.73321e-15	6.90172e-16
														0.773	-3.54213e-15	-5.68446e-15
														0.774	-1.76294e-15	-5.68446e-15
														0.775	-1.76294e-15	-5.29095e-15
														0.776	-4.03445e-15	1.12423e-15
														0.777	-2.79964e-15	6.7011e-15
														0.778	-7.58412e-15	6.7011e-15
														0.779	-6.15491e-15	2.76388e-15
														0.78	-4.76551e-15	-4.14839e-15
														0.781	-7.40206e-15	-5.64854e-15
														0.782	-7.40206e-15	-5.64854e-15
														0.783	-7.17133e-15	-3.15484e-15
														0.784	-7.17133e-15	-2.02567e-15
														0.785	-4.61401e-15	-7.0867e-16
														0.786	-1.69046e-15	-2.02567e-15
														0.787	-1.07092e-16	-2.35467e-15
														0.788	2.42919e-15	-3.47869e-15
														0.789	3.06194e-15	-3.47869e-15
														0.79	3.06194e-15	-6.28712e-15
														0.791	-2.48418e-15	-6.00402e-15
														0.792	-3.0962e-15	-7.92128e-15
														0.793	-5.11921e-15	-7.92128e-15
														0.794	-3.0962e-15	-5.38798e-15
														0.795	-3.55026e-15	-2.70138e-15
														0.796	-5.33604e-15	-2.70138e-15
														0.797	-5.494e-15	2.72014e-15
														0.798	-5.494e-15	2.71589e-15
														0.799	-1.78613e-15	-4.54059e-15
														0.8	1.56254e-15	-5.79202e-15
														0.801	1.56254e-15	-5.79202e-15
														0.802	-1.06805e-15	-2.3637e-15
														0.803	-7.00492e-15	-1.08469e-15
														0.804	-7.00492e-15	-1.08469e-15
														0.805	-4.95945e-15	-8.52822e-15
														0.806	-3.91493e-15	-8.52822e-15
														0.807	-6.00421e-17	-6.92591e-15
														0.808	2.90158e-16	-6.92591e-15
														0.809	-6.58726e-16	1.82325e-15
														0.81	3.14795e-17	-7.56592e-16
														0.811	-7.90993e-17	3.08764e-15
														0.812	-7.69305e-16	3.08764e-15
														0.813	-7.90993e-17	-2.80466e-15
														0.814	2.07728e-15	-1.16024e-14
														0.815	5.37911e-15	-1.16024e-14
														0.816	5.37911e-15	-9.89466e-15
														0.817	3.85376e-15	-3.5183e-15
														0.818	2.50208e-16	-5.20351e-16
														0.819	-3.20851e-15	2.32572e-15
														0.82	2.50208e-16	3.79651e-17
														0.821	-5.16256e-15	-1.02373e-15
														0.822	-1.39397e-15	-5.24991e-15
														0.823	-2.67712e-15	-7.10234e-15
														0.824	-2.67712e-15	-7.10234e-15
														0.825	-2.08307e-15	-4.50963e-15
														0.826	-5.38457e-15	-3.28217e-16
														0.827	-5.38457e-15	3.20081e-15
														0.828	-6.13949e-15	7.58628e-15
														0.829	-2.17576e-15	3.20081e-15
														0.83	1.00032e-15	2.01911e-15
														0.831	1.00032e-15	1.1733e-15
														0.832	7.95951e-16	1.1733e-15
														0.833	7.95951e-16	5.08158e-15
														0.834	-5.50629e-15	9.16485e-15
														0.835	-7.68196e-15	9.16485e-15
														0.836	2.31638e-16	6.68272e-15
														0.837	-1.45418e-15	9.18167e-15
														0.838	-4.16858e-15	3.89241e-15
														0.839	6.49672e-15	4.46283e-15
														0.84	-5.09188e-15	5.45869e-15
														0.841	-1.29572e-14	3.93546e-15
														0.842	-1.19015e-14	3.93546e-15
														0.843	-1.19015e-14	3.8783e-15
														0.844	-6.75763e-15	3.80409e-15
														0.845	-2.91477e-15	3.80409e-15
														0.846	-2.91477e-15	3.80409e-15
														0.847	6.83162e-16	7.84629e-15
														0.848	3.04669e-16	5.35466e-15
														0.849	2.4656e-15	5.35466e-15
														0.85	2.85906e-15	5.35466e-15
														0.851	1.43518e-15	-1.57692e-16
														0.852	1.43518e-15	-8.30034e-16
														0.853	-1.45905e-16	-5.30141e-15
														0.854	-3.92803e-15	-6.53472e-15
														0.855	-3.47168e-15	-7.38188e-15
														0.856	-6.33299e-15	-7.38188e-15
														0.857	-4.06907e-15	-2.77069e-15
														0.858	-1.06669e-15	-1.05648e-15
														0.859	1.85787e-16	-1.05648e-15
														0.86	2.76727e-15	-1.05648e-15
														0.861	1.65586e-15	-6.02595e-15
														0.862	8.23687e-15	-5.24113e-15
														0.863	8.66066e-17	8.06208e-16
														0.864	-9.36503e-15	3.33335e-15
														0.865	-1.99462e-15	8.3375e-15
														0.866	-3.36949e-15	8.3375e-15
														0.867	7.76721e-16	4.24472e-15
														0.868	2.1516e-15	8.6549e-15
														0.869	7.76721e-16	7.28438e-15
														0.87	3.00791e-15	7.28438e-15
														0.871	1.26268e-15	8.0473e-15
														0.872	1.80728e-15	4.72699e-15
														0.873	1.80728e-15	1.32017e-15
														0.874	-1.86979e-15	3.83864e-15
														0.875	1.26021e-15	5.00038e-15
														0.876	1.26021e-15	-1.59274e-15
														0.877	5.44827e-15	8.87614e-15
														0.878	5.44827e-15	1.46219e-15
														0.879	7.43382e-16	-6.47301e-15
														0.88	-7.25174e-15	-3.51308e-16
														0.881	-7.25174e-15	-6.1187e-15
														0.882	-6.31194e-15	-3.51308e-16
														0.883	-8.6215e-15	5.85739e-16
														0.884	-5.89386e-15	-2.47879e-15
														0.885	-8.26045e-15	-2.47879e-15
														0.886	-1.07104e-14	-2.47879e-15
														0.887	-8.26045e-15	-7.31841e-16
														0.888	-5.58094e-15	-1.92655e-15
														0.889	-8.03091e-15	3.30485e-15
														0.89	-2.96974e-15	-1.82525e-15
														0.891	-2.96974e-15	-2.43579e-15
														0.892	1.95382e-16	-1.97583e-15
														0.893	1.95382e-16	-1.97583e-15
														0.894	3.63524e-15	2.17714e-15
														0.895	-2.66939e-15	-1.71546e-15
														0.896	-6.826e-15	-1.16092e-15
														0.897	-1.516e-15	-8.6747e-15
														0.898	-1.516e-15	-8.6747e-15
														0.899	3.57401e-15	-4.83398e-15
														0.9	3.73524e-15	-2.95871e-15
														0.901	3.73524e-15	-2.95871e-15
														0.902	3.54941e-15	-2.2882e-15
														0.903	1.63127e-16	-4.9333e-16
														0.904	-2.4268e-16	-5.73342e-15
														0.905	-2.4268e-16	-5.63332e-15
														0.906	-1.71556e-15	-9.88561e-15
														0.907	-3.47305e-15	-9.88561e-15
														0.908	-3.47305e-15	-7.35288e-15
														0.909	-6.77644e-16	-1.06802e-15
														0.91	1.289e-15	4.51813e-15
														0.911	1.289e-15	4.51813e-15
														0.912	-2.09891e-15	-4.30304e-16
														0.913	-2.09891e-15	-9.02817e-15
														0.914	-2.14725e-15	-1.05638e-14
														0.915	-7.92641e-16	-5.14247e-15
														0.916	2.4295e-15	-4.09518e-15
														0.917	-7.92641e-16	-3.78276e-15
														0.918	1.87808e-16	-1.97223e-15
														0.919	4.81075e-15	1.76401e-15
														0.92	6.00371e-15	1.76401e-15
														0.921	6.00371e-15	2.32731e-15
														0.922	2.72443e-15	3.0699e-15
														0.923	-7.71356e-16	2.29738e-15
														0.924	-7.71356e-16	2.29738e-15
														0.925	3.60037e-15	2.29738e-15
														0.926	2.81585e-15	2.96164e-15
														0.927	2.81585e-15	4.96099e-15
														0.928	-3.62528e-15	-3.12655e-15
														0.929	-8.0872e-15	1.43975e-15
														0.93	-8.0872e-15	4.2889e-15
														0.931	-4.13625e-15	4.2889e-15
														0.932	5.96874e-15	7.05639e-15
														0.933	5.96874e-15	7.86511e-15
														0.934	1.59833e-15	8.18742e-15
														0.935	3.0168e-15	7.37869e-15
														0.936	3.0168e-15	-5.95665e-16
														0.937	5.55363e-15	-1.14225e-14
														0.938	6.39063e-15	-1.14225e-14
														0.939	1.06066e-14	-6.05962e-15
														0.94	5.69122e-15	-8.74885e-16
														0.941	5.73644e-15	1.10088e-15
														0.942	3.23671e-15	2.92719e-15
														0.943	1.06538e-15	-1.45737e-15
														0.944	3.23671e-15	-4.26615e-15
														0.945	1.02517e-15	-4.14139e-15
														0.946	-2.20705e-15	-4.14139e-15
														0.947	2.36206e-16	1.13752e-16
														0.948	2.36206e-16	2.16953e-15
														0.949	-2.34451e-15	1.51536e-15
														0.95	-7.14789e-17	1.51536e-15
														0.951	-6.14221e-16	4.56799e-15
														0.952	-2.83683e-15	2.42612e-15
														0.953	-6.14221e-16	2.42612e-15
														0.954	-1.1317e-15	2.13238e-15
														0.955	1.64516e-15	-1.18606e-15
														0.956	1.64516e-15	-2.29459e-15
														0.957	-8.91968e-16	1.00341e-15
														0.958	2.17872e-15	-3.33348e-15
														0.959	-1.23587e-15	-6.09704e-15
														0.96	1.2145e-16	-5.99239e-15
														0.961	2.95534e-15	-5.99239e-15
														0.962	4.34797e-16	-6.43662e-15
														0.963	4.34797e-16	1.56492e-15
														0.964	-1.90889e-16	1.56492e-15
														0.965	-1.90889e-16	-3.43143e-15
														0.966	1.34522e-15	8.46691e-16
														0.967	4.38056e-15	8.46691e-16
														0.968	4.38056e-15	8.46691e-16
														0.969	8.26049e-15	1.66036e-15
														0.97	3.31288e-16	-5.60961e-15
														0.971	1.84604e-15	-5.60961e-15
														0.972	1.53683e-15	-4.31543e-15
														0.973	1.53683e-15	-1.61009e-15
														0.974	7.59265e-15	6.31677e-15
														0.975	8.89305e-15	9.54014e-15
														0.976	8.89305e-15	9.54014e-15
														0.977	1.73082e-15	4.38862e-15
														0.978	-1.08593e-15	2.15472e-16
														0.979	-4.00926e-15	-1.52121e-16
														0.98	-1.41292e-15	-1.52121e-16
														0.981	4.77929e-16	4.70187e-17
														0.982	-4.92314e-16	4.70187e-17
														0.983	-4.92314e-16	-1.01781e-15
														0.984	-3.01264e-15	-1.01781e-15
														0.985	-9.71865e-15	2.02182e-15
														0.986	-9.71865e-15	7.30344e-15
														0.987	-9.97407e-15	7.30344e-15
														0.988	-2.08053e-15	8.12426e-15
														0.989	-1.58602e-15	3.99154e-15
														0.99	-9.95233e-16	3.75565e-15
														0.991	8.16799e-16	2.99289e-15
														0.992	-2.59952e-15	-6.93142e-16
														0.993	-4.81183e-15	-2.68312e-16
														0.994	-9.23841e-15	-2.68312e-16
														0.995	-9.75947e-15	-2.68312e-16
														0.996	-9.75947e-15	2.53269e-16
														0.997	-6.82312e-15	1.00882e-15
														0.998	-2.64145e-15	1.00882e-15
														0.999	-2.64145e-15	1.00882e-15
														1	2.61293e-15	1.74572e-15
														1.001	3.64564e-15	-1.23966e-15
														1.002	1.15783e-15	-5.30949e-15
														1.003	4.01536e-15	-1.23966e-15
														1.004	1.15783e-15	-5.30949e-15
														1.005	4.95548e-15	2.28994e-15
														1.006	3.42297e-15	9.18966e-15
														1.007	1.03253e-15	2.56527e-15
														1.008	6.6746e-15	2.56527e-15
														1.009	1.03253e-15	2.56527e-15
														1.01	4.5305e-15	-2.35823e-15
														1.011	4.15873e-15	-1.10602e-16
														1.012	-4.47347e-15	-1.10602e-16
														1.013	4.19328e-16	-1.10602e-16
														1.014	-6.64783e-18	-2.19653e-15
														1.015	-4.35018e-15	-5.45101e-15
														1.016	-4.35018e-15	-5.45101e-15
														1.017	-2.33648e-15	-5.45101e-15
														1.018	-1.35625e-15	-1.73472e-15
														1.019	2.01823e-15	-6.89031e-16
														1.02	2.01823e-15	1.0391e-15
														1.021	1.04907e-15	1.0391e-15
														1.022	-3.4456e-15	-1.00211e-15
														1.023	-6.68161e-15	-6.83924e-16
														1.024	-2.18694e-15	-4.1648e-16
														1.025	-4.14565e-15	-4.1648e-16
														1.026	7.63841e-16	6.64163e-15
														1.027	2.11931e-15	6.64163e-15
														1.028	-4.89699e-16	7.3781e-15
														1.029	-4.89699e-16	-1.61494e-16
														1.03	-7.97171e-16	-2.60459e-15
														1.031	-1.86305e-15	2.90747e-16
														1.032	-8.58101e-16	-2.60459e-15
														1.033	-1.73023e-15	2.42636e-15
														1.034	-2.63412e-15	9.49756e-16
														1.035	2.21238e-15	-6.23344e-15
														1.036	-2.12084e-15	-6.23344e-15
														1.037	7.06432e-16	-6.23344e-15
														1.038	6.78665e-15	-5.38291e-15
														1.039	5.72749e-15	-2.62137e-15
														1.04	5.72749e-15	1.15452e-15
														1.041	5.17131e-15	1.15452e-15
														1.042	2.84722e-15	1.15452e-15
														1.043	1.24759e-15	3.19029e-15
														1.044	9.90099e-16	3.7438e-15
														1.045	9.90099e-16	3.92937e-15
														1.046	9.90099e-16	3.92937e-15
														1.047	3.14767e-15	4.60086e-16
														1.048	5.02443e-15	9.38565e-16
														1.049	7.59866e-15	-3.9355e-15
														1.05	9.91463e-15	-5.47607e-15
														1.051	7.45501e-15	-1.74607e-15
														1.052	5.0302e-15	-1.74607e-15
														1.053	-2.27125e-15	-1.57056e-15
														1.054	-5.68377e-15	4.88508e-15
														1.055	-6.44162e-15	3.64089e-15
														1.056	-6.44162e-15	-6.76508e-17
														1.057	-6.16547e-15	-8.66628e-16
														1.058	-3.02941e-15	-8.66628e-16
														1.059	-3.02941e-15	1.65678e-15
														1.06	-1.77737e-15	-2.81256e-16
														1.061	2.55999e-15	9.26023e-16
														1.062	4.50842e-15	-2.81256e-16
														1.063	4.63148e-15	1.0651e-17
														1.064	4.63148e-15	1.77352e-15
														1.065	1.15355e-16	3.77221e-15
														1.066	-7.61107e-16	6.59365e-15
														1.067	-3.10027e-15	9.58531e-15
														1.068	-3.72227e-15	8.20699e-15
														1.069	-3.83427e-15	7.30089e-15
														1.07	-6.56721e-15	-1.26423e-15
														1.071	-6.56721e-15	-4.11152e-15
														1.072	-8.59304e-15	5.55841e-16
														1.073	-7.30619e-15	-3.27153e-15
														1.074	-7.93936e-15	1.39847e-15
														1.075	-5.37011e-15	4.18395e-16
														1.076	-2.16568e-16	-3.21646e-15
														1.077	-5.55702e-16	-6.401e-16
														1.078	-5.55702e-16	-6.401e-16
														1.079	-5.55702e-16	-6.401e-16
														1.08	-2.01264e-15	-7.56247e-16
														1.081	-3.95108e-15	-4.87505e-15
														1.082	-1.33404e-15	-4.87505e-15
														1.083	-3.95108e-15	-4.87505e-15
														1.084	-5.90415e-15	-4.66594e-15
														1.085	-4.5336e-15	-4.40413e-15
														1.086	-4.5336e-15	-6.42808e-15
														1.087	2.25156e-15	-4.01933e-15
														1.088	2.43285e-15	-4.04214e-16
														1.089	3.16555e-15	4.49655e-15
														1.09	3.16555e-15	4.49655e-15
														1.091	-2.62474e-16	2.74334e-15
														1.092	-4.24663e-16	2.74334e-15
														1.093	2.89929e-15	-1.49476e-15
														1.094	3.5623e-19	-3.48463e-16
														1.095	2.44633e-15	-1.30014e-15
														1.096	5.00798e-15	-5.33051e-15
														1.097	2.44633e-15	-9.33409e-18
														1.098	2.32144e-15	3.85918e-16
														1.099	3.75703e-15	5.40018e-15
														1.1	7.63341e-16	5.40018e-15
														1.101	7.63341e-16	4.15256e-15
														1.102	3.49879e-15	3.43616e-16
														1.103	2.00639e-15	3.43616e-16
														1.104	3.73191e-15	3.43616e-16
														1.105	5.22431e-15	5.63138e-16
														1.106	6.41662e-15	2.62677e-16
														1.107	6.41662e-15	-1.92e-15
														1.108	4.97041e-15	-1.41646e-15
														1.109	-5.884e-16	-1.92e-15
														1.11	-5.884e-16	-1.41646e-15
														1.111	-2.83573e-15	2.47708e-15
														1.112	-2.99163e-15	3.54705e-15
														1.113	-2.78345e-15	3.54705e-15
														1.114	-3.34658e-15	4.3412e-15
														1.115	-2.78345e-15	-3.56597e-15
														1.116	-7.433e-16	-9.59211e-15
														1.117	5.79065e-15	-8.369e-15
														1.118	5.79065e-15	-9.91212e-15
														1.119	1.0942e-14	-9.91212e-15
														1.12	4.82073e-15	-1.00253e-14
														1.121	4.2987e-15	-8.48064e-15
														1.122	4.57909e-15	-8.73903e-15
														1.123	-1.27767e-15	-1.67772e-14
														1.124	2.42522e-15	-8.73903e-15
														1.125	-2.26754e-15	-8.53729e-15
														1.126	-5.48154e-15	-1.05105e-15
														1.127	-7.69699e-15	-1.05105e-15
														1.128	-1.02218e-14	-2.82495e-15
														1.129	-1.0931e-14	1.54685e-15
														1.13	-1.0931e-14	-1.03342e-15
														1.131	-1.0931e-14	-1.03342e-15
														1.132	-8.47618e-15	9.67063e-16
														1.133	-1.30277e-15	1.80371e-15
														1.134	-1.30277e-15	-5.23128e-17
														1.135	-1.30277e-15	-1.7811e-15
														1.136	5.53975e-15	-2.7231e-15
														1.137	1.07204e-14	-2.7231e-15
														1.138	1.07204e-14	4.15633e-15
														1.139	1.24154e-14	4.15633e-15
														1.14	1.62284e-14	3.72064e-15
														1.141	7.55748e-15	1.12849e-15
														1.142	7.55748e-15	1.12849e-15
														1.143	-2.25855e-15	-1.83391e-15
														1.144	-3.58409e-15	3.13121e-15
														1.145	-3.58409e-15	2.62822e-15
														1.146	1.02746e-15	2.62822e-15
														1.147	5.76283e-15	2.62822e-15
														1.148	5.76283e-15	-7.27085e-16
														1.149	4.82685e-15	1.48086e-15
														1.15	-1.28241e-15	1.48086e-15
														1.151	-8.07059e-15	1.48086e-15
														1.152	-2.93451e-15	1.85326e-15
														1.153	-2.93451e-15	-1.31709e-15
														1.154	-2.76233e-15	-7.61171e-15
														1.155	-7.49611e-16	-1.31709e-15
														1.156	-1.13832e-16	4.37731e-15
														1.157	-2.8677e-15	1.09052e-14
														1.158	9.8805e-16	1.09052e-14
														1.159	3.22802e-15	7.56887e-16
														1.16	-1.50776e-15	-2.91297e-15
														1.161	-1.49562e-15	-3.73575e-15
														1.162	-1.49562e-15	1.75413e-15
														1.163	-3.96401e-15	6.38272e-15
														1.164	1.16774e-15	9.68137e-15
														1.165	6.37918e-15	9.68137e-15
														1.166	1.16774e-15	1.13e-14
														1.167	6.37918e-15	9.27739e-15
														1.168	-2.26256e-15	1.26643e-14
														1.169	-1.4273e-14	1.50747e-14
														1.17	-4.51128e-15	1.1791e-14
														1.171	-9.94617e-15	1.05224e-14
														1.172	-2.45183e-15	2.33197e-15
														1.173	-1.67651e-15	9.54553e-16
														1.174	-1.67651e-15	9.54553e-16
														1.175	-1.67651e-15	7.30251e-15
														1.176	-9.63099e-16	1.06271e-14
														1.177	3.87614e-15	1.06271e-14
														1.178	7.63865e-15	7.00989e-15
														1.179	7.63865e-15	-2.86541e-15
														1.18	2.21982e-15	-9.09065e-15
														1.181	-3.93107e-15	-5.72282e-15
														1.182	-6.40967e-15	-5.72282e-15
														1.183	-3.93107e-15	3.39744e-15
														1.184	-2.60714e-15	1.03506e-14
														1.185	1.533e-15	1.03506e-14
														1.186	2.71186e-15	7.77544e-15
														1.187	3.0303e-15	9.95937e-15
														1.188	7.43183e-15	3.3044e-15
														1.189	1.45212e-14	3.3044e-15
														1.19	7.61865e-15	1.92017e-15
														1.191	1.07607e-14	1.92017e-15
														1.192	6.71422e-15	4.96686e-15
														1.193	1.52545e-15	6.49137e-15
														1.194	3.16781e-15	6.49137e-15
														1.195	1.15152e-15	7.38393e-15
														1.196	2.07765e-15	1.20672e-14
														1.197	2.7619e-15	8.96234e-15
														1.198	2.7619e-15	1.19473e-14
														1.199	2.01521e-15	5.31981e-15
														1.2	1.90918e-15	1.24659e-15
														1.201	1.91374e-15	4.23153e-15
														1.202	1.91374e-15	2.46002e-15
														1.203	1.76456e-15	2.78276e-15
														1.204	5.63267e-15	3.08516e-15
														1.205	7.35418e-15	3.08516e-15
														1.206	9.33351e-15	8.04828e-15
														1.207	9.33351e-15	9.74653e-15
														1.208	3.72624e-15	1.41175e-14
														1.209	3.82079e-15	1.00699e-14
														1.21	-3.78113e-16	1.00699e-14
														1.211	1.328e-15	1.23576e-14
														1.212	3.20823e-15	8.8805e-15
														1.213	-2.91957e-15	1.30905e-14
														1.214	3.20823e-15	8.74193e-15
														1.215	6.76963e-15	7.5431e-15
														1.216	7.6731e-15	7.5431e-15
														1.217	1.23866e-14	4.82786e-15
														1.218	8.22378e-15	2.33055e-15
														1.219	1.60039e-15	2.33055e-15
														1.22	6.2668e-15	2.64787e-15
														1.221	6.2668e-15	8.83734e-16
														1.222	5.47458e-15	1.74841e-15
														1.223	9.45448e-15	6.76474e-16
														1.224	8.24831e-15	-1.71415e-15
														1.225	6.33399e-17	-2.44439e-15
														1.226	1.62178e-15	-2.44439e-15
														1.227	3.80428e-15	3.0686e-15
														1.228	4.01539e-15	1.13061e-14
														1.229	7.73475e-15	1.13061e-14
														1.23	1.19978e-14	1.51599e-14
														1.231	7.73475e-15	1.08069e-14
														1.232	3.42307e-18	6.2796e-15
														1.233	-2.92088e-15	6.2796e-15
														1.234	-2.92088e-15	6.2796e-15
														1.235	6.17421e-16	4.20686e-15
														1.236	3.1447e-15	-1.27089e-15
														1.237	3.1447e-15	-5.21231e-15
														1.238	3.82039e-15	-5.21231e-15
														1.239	3.83471e-16	-1.66381e-15
														1.24	-1.06621e-15	4.25697e-15
														1.241	-2.15645e-16	7.68495e-15
														1.242	-2.15645e-16	8.90138e-15
														1.243	2.65999e-15	8.90138e-15
														1.244	8.02083e-15	1.64819e-15
														1.245	1.06116e-14	1.83741e-15
														1.246	6.99182e-15	4.36854e-15
														1.247	2.71693e-15	7.91005e-15
														1.248	6.12934e-16	1.45149e-14
														1.249	6.12934e-16	1.52971e-14
														1.25	1.90857e-15	1.52971e-14
														1.251	6.90684e-15	1.52971e-14
														1.252	5.03183e-15	1.30753e-14
														1.253	3.35567e-17	8.25256e-15
														1.254	4.8637e-17	7.58386e-15
														1.255	4.8637e-17	9.76454e-15
														1.256	2.84567e-16	7.11032e-15
														1.257	4.10234e-16	1.01353e-14
														1.258	4.10234e-16	7.35096e-15
														1.259	1.1591e-15	7.35096e-15
														1.26	-3.44236e-15	7.35096e-15
														1.261	-1.00724e-15	5.27023e-15
														1.262	8.19786e-15	1.01935e-14
														1.263	6.25596e-15	1.07169e-14
														1.264	8.22465e-15	1.07169e-14
														1.265	7.45434e-15	1.0593e-14
														1.266	2.92801e-15	1.11651e-14
														1.267	7.45434e-15	8.38335e-15
														1.268	6.73454e-15	8.38335e-15
														1.269	3.8728e-15	7.73776e-15
														1.27	3.81047e-15	7.73776e-15
														1.271	9.4817e-16	1.82131e-15
														1.272	3.50191e-15	2.05038e-15
														1.273	3.50191e-15	7.7204e-15
														1.274	7.12593e-16	3.47848e-15
														1.275	9.2007e-15	7.7204e-15
														1.276	8.90039e-15	7.6422e-15
														1.277	4.11841e-15	8.18742e-15
														1.278	1.01585e-14	1.14093e-14
														1.279	9.26892e-15	8.18742e-15
														1.28	1.52716e-14	1.13371e-14
														1.281	1.52716e-14	1.21476e-14
														1.282	1.07717e-14	5.6201e-15
														1.283	9.99298e-15	1.19487e-14
														1.284	5.30716e-15	1.18944e-14
														1.285	7.2313e-15	6.91128e-15
														1.286	4.03248e-15	1.18944e-14
														1.287	-4.39747e-16	6.98362e-15
														1.288	1.54891e-15	5.32053e-15
														1.289	1.54891e-15	8.28981e-15
														1.29	3.76839e-15	5.61968e-15
														1.291	3.76839e-15	8.28981e-15
														1.292	3.99336e-15	8.63172e-15
														1.293	5.13211e-15	9.70516e-15
														1.294	8.16539e-15	9.70516e-15
														1.295	1.07457e-14	5.95897e-15
														1.296	1.07457e-14	2.57751e-15
														1.297	5.81355e-15	1.49969e-15
														1.298	-1.71796e-15	1.66288e-16
														1.299	-3.58517e-15	1.24411e-15
														1.3	1.0615e-15	-9.45245e-16
														1.301	-8.3237e-16	-9.45815e-16
														1.302	-8.3237e-16	4.32388e-15
														1.303	6.26862e-15	1.42832e-15
														1.304	2.75913e-16	1.42832e-15
														1.305	7.40357e-15	3.65102e-15
														1.306	9.91329e-15	1.27613e-15
														1.307	6.97533e-15	-2.76031e-15
														1.308	6.97533e-15	1.27613e-15
														1.309	5.50092e-15	-2.76031e-15
														1.31	6.04595e-15	3.54892e-15
														1.311	3.68067e-15	2.75579e-15
														1.312	5.56759e-16	-2.29824e-15
														1.313	5.48142e-15	9.48057e-15
														1.314	-1.04145e-15	6.95732e-15
														1.315	-3.93136e-17	1.17948e-14
														1.316	-3.93136e-17	1.17948e-14
														1.317	-3.93136e-17	7.18825e-15
														1.318	1.16796e-15	-1.27345e-16
														1.319	-3.0048e-15	-1.27345e-16
														1.32	-2.14064e-16	-5.26026e-15
														1.321	-2.14064e-16	1.73032e-15
														1.322	1.01998e-15	7.8299e-15
														1.323	6.65524e-15	1.89619e-15
														1.324	5.6452e-15	7.8299e-15
														1.325	-7.15486e-16	8.86245e-15
														1.326	1.72962e-15	2.92874e-15
														1.327	-4.72396e-16	8.70805e-15
														1.328	-4.72396e-16	7.59704e-15
														1.329	3.37839e-16	2.73617e-15
														1.33	-7.88315e-16	3.62773e-15
														1.331	-7.88315e-16	-4.42891e-16
														1.332	-5.43822e-16	-4.42891e-16
														1.333	2.28042e-15	6.89429e-15
														1.334	4.82635e-15	8.94525e-15
														1.335	1.27873e-15	8.94525e-15
														1.336	1.08012e-15	5.62767e-15
														1.337	1.1063e-16	-4.58048e-16
														1.338	1.1063e-16	-3.12055e-15
														1.339	1.84656e-15	2.96516e-15
														1.34	3.32465e-15	1.53106e-15
														1.341	5.38052e-15	5.44173e-15
														1.342	5.43376e-15	5.44173e-15
														1.343	5.43376e-15	1.70149e-15
														1.344	3.41889e-15	2.41172e-15
														1.345	3.41889e-15	-1.97804e-15
														1.346	-1.01268e-15	2.41172e-15
														1.347	2.98244e-16	6.07693e-15
														1.348	-1.31081e-15	8.65966e-15
														1.349	-1.31081e-15	1.29113e-14
														1.35	-1.31081e-15	1.78386e-14
														1.351	3.08238e-15	1.78386e-14
														1.352	1.43342e-15	1.20935e-14
														1.353	-3.75957e-15	5.01655e-15
														1.354	-5.90184e-15	4.64631e-15
														1.355	-6.26656e-15	4.64631e-15
														1.356	-3.33553e-15	2.58736e-15
														1.357	-5.04595e-15	9.62097e-16
														1.358	-4.31986e-15	-6.69105e-16
														1.359	-2.77292e-15	5.01006e-16
														1.36	5.34883e-16	-9.1644e-16
														1.361	5.34883e-16	-7.71985e-16
														1.362	5.94376e-15	4.52603e-15
														1.363	5.94376e-15	3.04097e-15
														1.364	1.54831e-15	3.04097e-15
														1.365	5.22961e-15	-3.22252e-15
														1.366	2.99844e-15	-3.5578e-15
														1.367	2.99844e-15	-4.96692e-15
														1.368	2.99844e-15	-2.62869e-15
														1.369	5.90542e-16	-1.50411e-15
														1.37	-2.7296e-15	-2.91323e-15
														1.371	-5.1813e-15	-5.211e-17
														1.372	-5.1813e-15	-4.18874e-15
														1.373	-3.58914e-15	-4.6245e-15
														1.374	-3.58914e-15	3.25707e-15
														1.375	7.3821e-18	3.25707e-15
														1.376	1.74233e-15	8.044e-15
														1.377	1.74233e-15	1.17638e-14
														1.378	1.74233e-15	1.10322e-14
														1.379	3.82043e-15	7.31246e-15
														1.38	4.41165e-15	9.90291e-15
														1.381	-9.38553e-17	6.29677e-15
														1.382	3.63754e-15	8.48841e-15
														1.383	3.63754e-15	1.0327e-14
														1.384	2.86408e-15	6.7209e-15
														1.385	2.86408e-15	5.75851e-15
														1.386	8.19131e-15	5.62359e-15
														1.387	5.54912e-15	2.63197e-15
														1.388	4.81827e-15	5.29806e-15
														1.389	6.94581e-15	8.36249e-15
														1.39	1.73123e-15	5.37087e-15
														1.391	1.73123e-15	8.57829e-15
														1.392	3.90029e-15	9.6607e-15
														1.393	5.65671e-15	9.66599e-15
														1.394	5.65671e-15	9.66599e-15
														1.395	4.14642e-15	1.17664e-14
														1.396	3.43747e-15	9.43895e-15
														1.397	2.22013e-15	8.35699e-15
														1.398	3.43747e-15	8.35699e-15
														1.399	3.8395e-15	8.35699e-15
														1.4	7.92674e-15	4.00162e-15
														1.401	7.92674e-15	2.74576e-15
														1.402	3.96973e-15	2.74576e-15
														1.403	-3.61957e-15	2.74576e-15
														1.404	-3.61957e-15	4.15777e-15
														1.405	8.26968e-16	5.36769e-15
														1.406	3.72158e-15	5.36769e-15
														1.407	6.49085e-15	7.42385e-15
														1.408	8.42063e-15	6.66109e-15
														1.409	1.22175e-14	2.80489e-15
														1.41	1.22175e-14	6.66109e-15
														1.411	5.59261e-15	5.92283e-15
														1.412	4.29754e-15	8.36843e-15
														1.413	4.29754e-15	8.36843e-15
														1.414	9.13417e-15	3.3523e-15
														1.415	1.59033e-14	4.53963e-15
														1.416	1.59033e-14	2.4832e-15
														1.417	1.4003e-14	9.04492e-15
														1.418	4.95372e-15	9.12085e-15
														1.419	-5.14106e-15	5.51883e-15
														1.42	-8.79319e-15	4.12029e-15
														1.421	-8.79319e-15	3.42418e-15
														1.422	-1.26014e-15	-2.24684e-16
														1.423	4.58013e-15	3.42418e-15
														1.424	4.89065e-15	5.39347e-15
														1.425	3.97255e-15	4.66866e-15
														1.426	8.06259e-16	9.93992e-15
														1.427	-1.42762e-15	1.38388e-14
														1.428	-1.42762e-15	1.1031e-14
														1.429	4.27268e-15	1.1031e-14
														1.43	4.27268e-15	1.1031e-14
														1.431	8.99819e-15	9.84323e-15
														1.432	1.09048e-14	8.64722e-15
														1.433	4.41245e-15	8.64722e-15
														1.434	7.90565e-15	5.40692e-15
														1.435	8.71643e-15	1.74115e-15
														1.436	1.83629e-15	1.86023e-15
														1.437	6.88641e-15	6.45512e-15
														1.438	2.10888e-15	5.02666e-15
														1.439	-1.38495e-15	7.34524e-15
														1.44	-1.38495e-15	7.34524e-15
														1.441	-3.69756e-15	7.41263e-15
														1.442	-2.07244e-15	8.16749e-15
														1.443	-1.18483e-16	8.16749e-15
														1.444	5.14554e-15	7.40872e-15
														1.445	8.99999e-15	5.33394e-15
														1.446	8.65501e-15	4.47941e-15
														1.447	1.11496e-14	2.20601e-15
														1.448	7.94768e-15	2.20601e-15
														1.449	4.56758e-15	2.89053e-15
														1.45	1.793e-15	4.19065e-15
														1.451	-5.24111e-17	4.20097e-15
														1.452	1.8367e-15	3.49762e-15
														1.453	5.78461e-15	3.49762e-15
														1.454	8.0828e-15	7.26505e-15
														1.455	9.94753e-15	1.06816e-14
														1.456	9.97333e-15	1.06816e-14
														1.457	7.86088e-15	1.2498e-14
														1.458	7.86088e-15	1.02253e-14
														1.459	7.88691e-15	5.6386e-15
														1.46	7.16863e-15	6.49129e-15
														1.461	7.34168e-15	3.24532e-15
														1.462	4.96598e-15	3.24532e-15
														1.463	1.69494e-15	3.25949e-15
														1.464	4.47972e-15	1.11416e-15
														1.465	3.07688e-15	7.7153e-15
														1.466	6.27106e-15	1.11416e-15
														1.467	8.63082e-15	7.34298e-15
														1.468	1.22137e-14	9.49346e-15
														1.469	1.30734e-14	1.50705e-15
														1.47	1.30734e-14	9.27918e-15
														1.471	7.78842e-15	2.41002e-15
														1.472	5.41294e-15	6.78408e-16
														1.473	5.41294e-15	4.62559e-15
														1.474	4.52736e-15	4.62559e-15
														1.475	4.00435e-15	6.88155e-15
														1.476	4.21904e-15	1.17407e-14
														1.477	4.21904e-15	1.17407e-14
														1.478	5.88416e-15	5.04355e-16
														1.479	5.88416e-15	-1.53842e-15
														1.48	5.96147e-15	-1.53842e-15
														1.481	6.31731e-15	4.45296e-15
														1.482	1.50194e-15	4.45296e-15
														1.483	6.56376e-15	1.14151e-14
														1.484	8.31768e-15	7.24651e-15
														1.485	6.79644e-15	9.07781e-15
														1.486	8.88776e-15	9.07781e-15
														1.487	1.1831e-14	7.35535e-15
														1.488	7.7061e-15	4.47566e-15
														1.489	1.06647e-14	1.60257e-15
														1.49	5.47103e-15	7.22429e-18
														1.491	-1.60414e-15	-2.34194e-15
														1.492	1.78074e-16	-2.29875e-15
														1.493	1.78074e-16	5.9931e-15
														1.494	1.57106e-15	8.52717e-15
														1.495	7.29782e-15	8.52717e-15
														1.496	1.09081e-14	4.86868e-15
														1.497	1.09081e-14	4.86868e-15
														1.498	8.03792e-15	4.14842e-15
														1.499	6.00504e-15	3.20264e-15
														1.5	3.81246e-15	3.20264e-15
														1.501	1.67475e-15	1.86945e-15
														1.502	1.67475e-15	1.86945e-15
														1.503	5.91215e-15	2.8441e-15
														1.504	5.31291e-15	2.8441e-15
														1.505	4.97551e-15	7.54004e-15
														1.506	4.97551e-15	1.06803e-14
														1.507	4.9855e-15	1.1592e-14
														1.508	1.04421e-14	1.21427e-14
														1.509	1.19877e-14	1.21427e-14
														1.51	1.19877e-14	8.29749e-15
														1.511	1.01268e-14	8.29749e-15
														1.512	6.58505e-15	8.62465e-15
														1.513	4.90985e-15	6.71111e-15
														1.514	3.23736e-15	1.0808e-14
														1.515	3.69339e-15	4.80634e-15
														1.516	3.69339e-15	-4.0224e-17
														1.517	1.81513e-15	1.76115e-15
														1.518	1.81513e-15	-1.09468e-15
														1.519	3.81245e-15	1.76115e-15
														1.52	-1.9464e-15	1.38284e-15
														1.521	3.38951e-15	6.57018e-15
														1.522	8.00985e-15	1.33992e-14
														1.523	5.10205e-16	1.33992e-14
														1.524	9.4474e-15	1.33992e-14
														1.525	2.55112e-15	8.72036e-15
														1.526	-4.21538e-15	8.98152e-15
														1.527	-4.14946e-15	4.21068e-15
														1.528	-4.14946e-15	2.85321e-15
														1.529	2.26198e-15	2.86767e-16
														1.53	7.23425e-15	2.86767e-16
														1.531	7.23425e-15	3.85598e-16
														1.532	4.79697e-15	2.80657e-15
														1.533	4.79697e-15	3.9037e-15
														1.534	3.48878e-15	5.76713e-15
														1.535	4.78625e-15	5.57423e-15
														1.536	6.28224e-15	5.57423e-15
														1.537	6.28224e-15	9.42474e-15
														1.538	9.57584e-15	6.44049e-15
														1.539	1.09641e-14	8.22647e-15
														1.54	1.09641e-14	1.12107e-14
														1.541	1.21216e-14	8.22647e-15
														1.542	1.13392e-14	7.14842e-15
														1.543	1.50426e-14	3.48238e-15
														1.544	1.50426e-14	2.06667e-15
														1.545	1.13502e-14	3.06795e-15
														1.546	1.03009e-14	3.06795e-15
														1.547	8.41069e-15	6.485e-15
														1.548	1.03009e-14	1.34177e-14
														1.549	1.32684e-14	1.34177e-14
														1.55	1.30469e-14	1.43112e-14
														1.551	1.16482e-14	1.0416e-14
														1.552	-8.04895e-16	7.49234e-15
														1.553	-8.04895e-16	1.64134e-14
														1.554	-5.51076e-16	8.62853e-15
														1.555	8.05566e-15	1.64134e-14
														1.556	1.10798e-14	1.14938e-14
														1.557	1.10798e-14	1.04149e-15
														1.558	8.68938e-15	5.17845e-15
														1.559	7.65019e-15	5.17845e-15
														1.56	3.15975e-15	8.82978e-15
														1.561	3.86416e-15	1.48277e-14
														1.562	4.34728e-15	1.16747e-14
														1.563	4.89362e-15	3.43682e-15
														1.564	4.89362e-15	-2.61633e-15
														1.565	4.25763e-15	-3.98464e-15
														1.566	4.46027e-15	-3.98464e-15
														1.567	9.556e-16	-3.81109e-15
														1.568	5.05064e-15	4.10707e-16
														1.569	5.05064e-15	1.70771e-15
														1.57	5.05064e-15	-1.78035e-15
														1.571	7.50398e-15	1.70771e-15
														1.572	1.78015e-15	3.6319e-15
														1.573	9.04052e-15	8.14344e-15
														1.574	1.07795e-14	8.14344e-15
														1.575	1.07795e-14	1.04548e-14
														1.576	1.07795e-14	6.09225e-15
														1.577	7.18699e-15	-1.80544e-15
														1.578	8.84344e-15	7.54663e-15
														1.579	6.99564e-15	-1.65057e-15
														1.58	8.37692e-15	-4.80829e-15
														1.581	8.37692e-15	6.07094e-15
														1.582	8.37692e-15	5.62836e-16
														1.583	5.82483e-15	6.47876e-15
														1.584	6.04591e-15	1.09832e-14
														1.585	6.10609e-15	6.47876e-15
														1.586	5.57981e-15	6.22023e-15
														1.587	3.59725e-15	7.41294e-15
														1.588	3.59725e-15	4.88315e-15
														1.589	-1.26582e-15	7.03403e-15
														1.59	2.00164e-15	8.52315e-15
														1.591	6.72811e-15	6.74666e-15
														1.592	1.77722e-15	6.74666e-15
														1.593	3.09117e-15	6.74666e-15
														1.594	2.41962e-15	1.05369e-14
														1.595	2.41962e-15	1.09245e-14
														1.596	5.68004e-15	1.09245e-14
														1.597	6.14864e-15	1.09245e-14
														1.598	7.82569e-15	6.41466e-15
														1.599	7.12606e-15	4.36408e-15
														1.6	5.8672e-15	5.6112e-15
														1.601	7.12606e-15	5.6112e-15
														1.602	5.8672e-15	5.6112e-15
														1.603	7.00963e-15	2.67665e-15
														1.604	8.01936e-15	2.07327e-15
														1.605	8.48069e-15	-3.14444e-15
														1.606	8.48069e-15	9.30725e-16
														1.607	9.20473e-15	6.14843e-15
														1.608	1.22336e-14	9.30725e-16
														1.609	8.26441e-15	7.18253e-15
														1.61	7.58473e-15	2.14866e-15
														1.611	5.00239e-15	-5.77899e-15
														1.612	4.6549e-15	2.85519e-16
														1.613	5.23366e-15	-5.40446e-15
														1.614	5.58114e-15	-2.07003e-15
														1.615	7.19846e-15	2.3199e-16
														1.616	7.19846e-15	2.3199e-16
														1.617	9.7292e-15	5.69021e-15
														1.618	1.03448e-14	5.17464e-15
														1.619	7.61763e-15	5.17464e-15
														1.62	7.61763e-15	4.18441e-15
														1.621	2.23609e-15	4.18441e-15
														1.622	-3.26807e-15	7.7706e-15
														1.623	-3.26807e-15	9.46729e-15
														1.624	1.4119e-15	9.40509e-15
														1.625	4.46425e-15	6.95211e-15
														1.626	4.46425e-15	5.17635e-15
														1.627	5.68735e-15	5.17635e-15
														1.628	8.24185e-15	5.61475e-15
														1.629	3.9019e-15	9.43045e-15
														1.63	3.9019e-15	9.43045e-15
														1.631	-1.51997e-15	9.8126e-15
														1.632	-5.94925e-15	8.39085e-15
														1.633	-6.42033e-15	7.15266e-15
														1.634	-6.42033e-15	8.39085e-15
														1.635	-3.55951e-16	7.95378e-15
														1.636	2.21179e-17	8.48144e-15
														1.637	5.49192e-15	8.48144e-15
														1.638	7.93636e-15	4.64709e-15
														1.639	2.69241e-15	3.59939e-15
														1.64	3.65443e-15	3.56331e-15
														1.641	-2.65703e-15	4.8313e-15
														1.642	-2.65703e-15	6.86908e-15
														1.643	1.03956e-15	8.33522e-15
														1.644	-1.6782e-15	8.33522e-15
														1.645	-1.53042e-15	9.63309e-15
														1.646	-3.37529e-15	9.63309e-15
														1.647	-6.34285e-15	9.51092e-15
														1.648	-5.6353e-15	1.12037e-14
														1.649	-5.6353e-15	7.58073e-15
														1.65	-5.6353e-15	4.34811e-15
														1.651	-8.76075e-16	7.70818e-15
														1.652	3.98523e-16	6.21683e-15
														1.653	2.96266e-15	1.06535e-14
														1.654	-3.06526e-16	1.06535e-14
														1.655	-2.94395e-15	1.21788e-14
														1.656	-4.70512e-15	9.96802e-15
														1.657	-4.70512e-15	3.62808e-15
														1.658	-2.42103e-15	3.62808e-15
														1.659	-4.52003e-15	3.62808e-15
														1.66	-3.38877e-15	2.38907e-16
														1.661	2.99447e-15	4.51378e-15
														1.662	-8.10096e-16	1.44918e-14
														1.663	-8.10096e-16	8.74411e-15
														1.664	-2.87517e-15	8.74411e-15
														1.665	-3.68365e-15	1.01354e-14
														1.666	-9.15193e-15	6.06113e-15
														1.667	-3.71845e-15	5.2073e-15
														1.668	1.68077e-15	1.09778e-14
														1.669	2.17377e-15	6.54741e-15
														1.67	5.86267e-15	9.54553e-15
														1.671	1.38885e-14	9.54553e-15
														1.672	1.38885e-14	9.54553e-15
														1.673	7.29025e-15	1.45311e-14
														1.674	2.36473e-15	1.82107e-14
														1.675	-1.24632e-15	1.82107e-14
														1.676	-3.42469e-15	1.44174e-14
														1.677	-3.42469e-15	1.4091e-14
														1.678	-6.65926e-16	1.4091e-14
														1.679	3.65593e-15	1.4091e-14
														1.68	3.65593e-15	1.09148e-14
														1.681	3.65593e-15	1.26169e-14
														1.682	5.9719e-15	6.72114e-16
														1.683	5.72156e-15	8.48045e-15
														1.684	6.707e-15	1.69026e-14
														1.685	8.94495e-16	1.04773e-14
														1.686	1.56916e-16	1.04773e-14
														1.687	3.35423e-15	5.59728e-15
														1.688	5.70283e-15	4.12996e-15
														1.689	8.49325e-15	4.12996e-15
														1.69	8.49325e-15	3.72325e-15
														1.691	6.79681e-15	2.93625e-15
														1.692	6.03213e-15	7.75691e-15
														1.693	2.50858e-15	2.02243e-15
														1.694	5.45096e-16	2.09754e-15
														1.695	4.06865e-15	7.83201e-15
														1.696	-1.92168e-15	1.67686e-15
														1.697	5.59782e-15	6.69771e-15
														1.698	4.31793e-15	9.81986e-15
														1.699	-1.15122e-15	9.81986e-15
														1.7	1.13493e-15	9.81986e-15
														1.701	-9.70151e-16	9.67561e-15
														1.702	-3.12898e-16	7.47541e-15
														1.703	5.87863e-16	5.12069e-15
														1.704	-8.11959e-17	5.12069e-15
														1.705	-8.11959e-17	8.1166e-15
														1.706	-6.4573e-16	7.07915e-15
														1.707	-6.4573e-16	1.0588e-14
														1.708	2.42918e-15	1.19908e-15
														1.709	2.42918e-15	-7.17153e-15
														1.71	4.75426e-15	6.2518e-15
														1.711	1.38826e-16	-5.47416e-15
														1.712	-2.85092e-16	-5.47416e-15
														1.713	-2.85092e-16	1.17468e-15
														1.714	-1.79451e-15	1.17468e-15
														1.715	-1.84514e-15	3.60403e-15
														1.716	-1.84514e-15	3.60403e-15
														1.717	5.10512e-16	3.64817e-15
														1.718	1.73198e-15	2.10218e-15
														1.719	1.73198e-15	4.81385e-15
														1.72	-4.59726e-16	4.81385e-15
														1.721	1.03387e-15	1.48192e-15
														1.722	1.57035e-15	-1.87213e-15
														1.723	9.52137e-16	-1.87213e-15
														1.724	6.31418e-15	8.51773e-16
														1.725	6.31418e-15	-2.71447e-15
														1.726	3.50697e-15	1.84533e-15
														1.727	3.50697e-15	3.00876e-15
														1.728	-3.95016e-15	3.00876e-15
														1.729	-3.95016e-15	3.00876e-15
														1.73	-3.66651e-16	-7.62365e-16
														1.731	4.73052e-15	-8.41545e-15
														1.732	1.00132e-14	-8.41545e-15
														1.733	6.8097e-15	-6.89068e-15
														1.734	8.87899e-16	-4.6976e-15
														1.735	-1.74681e-15	-2.06872e-15
														1.736	-1.74681e-15	9.53732e-16
														1.737	-8.40519e-16	-2.82658e-15
														1.738	4.87757e-15	5.41561e-15
														1.739	5.67555e-15	6.23621e-15
														1.74	2.85933e-15	-4.76436e-16
														1.741	-7.28849e-17	-4.76436e-16
														1.742	-2.31707e-15	-4.76436e-16
														1.743	-2.31707e-15	-1.22424e-15
														1.744	-7.65675e-16	3.2781e-15
														1.745	-7.65675e-16	3.2781e-15
														1.746	2.61032e-15	-1.76998e-16
														1.747	4.22558e-15	-1.45129e-15
														1.748	-1.03866e-15	-3.84295e-15
														1.749	4.22558e-15	-1.45129e-15
														1.75	5.18305e-15	-8.11008e-16
														1.751	1.33099e-15	-1.39792e-15
														1.752	6.73238e-15	6.1385e-15
														1.753	6.94273e-17	2.99175e-15
														1.754	-2.32264e-15	-5.14787e-15
														1.755	3.23682e-15	-6.43474e-15
														1.756	1.86921e-15	-7.24361e-15
														1.757	4.22443e-15	-7.24361e-15
														1.758	4.22443e-15	-5.29287e-15
														1.759	-1.78323e-15	-1.71492e-15
														1.76	-4.52481e-16	2.08421e-15
														1.761	-1.68085e-16	2.42352e-15
														1.762	7.68566e-15	4.83829e-15
														1.763	1.05949e-14	5.04836e-15
														1.764	1.28173e-14	5.04836e-15
														1.765	1.28173e-14	3.01903e-15
														1.766	6.97835e-15	-1.86491e-15
														1.767	-3.35865e-15	-1.86491e-15
														1.768	-4.35665e-15	-1.86491e-15
														1.769	-4.95111e-15	2.52076e-15
														1.77	-3.54077e-15	8.0455e-15
														1.771	-2.32593e-15	5.11364e-15
														1.772	-3.54077e-15	5.11364e-15
														1.773	-4.56122e-15	3.61783e-15
														1.774	-5.91191e-15	1.72125e-15
														1.775	-5.91191e-15	-4.94076e-16
														1.776	-6.33083e-15	1.30431e-15
														1.777	-1.43045e-15	-3.98218e-15
														1.778	2.79035e-15	-6.77045e-15
														1.779	4.6077e-15	-2.72092e-15
														1.78	4.6077e-15	-3.57406e-15
														1.781	3.56156e-15	1.92591e-16
														1.782	-1.16035e-15	1.27822e-15
														1.783	-6.67341e-15	4.25084e-16
														1.784	-1.03241e-15	4.35605e-15
														1.785	-3.22607e-15	6.32222e-15
														1.786	-3.22607e-15	6.32222e-15
														1.787	-5.77003e-15	9.07904e-15
														1.788	-9.65819e-15	9.9287e-15
														1.789	-1.11598e-14	9.9287e-15
														1.79	-1.16688e-14	9.01848e-15
														1.791	-9.1846e-15	3.91592e-15
														1.792	-5.4982e-15	4.03371e-15
														1.793	8.18262e-16	9.5107e-15
														1.794	2.26405e-15	5.27177e-15
														1.795	2.26405e-15	5.27177e-15
														1.796	2.21332e-15	7.45826e-16
														1.797	-2.14115e-15	7.45826e-16
														1.798	-6.71508e-15	2.29901e-15
														1.799	-7.38316e-15	4.63671e-15
														1.8	-6.79563e-15	4.63671e-15
														1.801	-4.75341e-15	3.13504e-15
														1.802	-8.88337e-16	3.13504e-15
														1.803	1.26641e-15	7.25249e-15
														1.804	2.50924e-15	6.79287e-15
														1.805	2.50924e-15	8.60145e-15
														1.806	4.35169e-16	1.65075e-15
														1.807	4.35169e-16	-3.05106e-16
														1.808	3.89086e-15	-5.84703e-15
														1.809	1.13439e-15	-5.84703e-15
														1.81	1.13439e-15	-5.84703e-15
														1.811	-8.14561e-15	-3.23251e-15
														1.812	-8.14561e-15	4.05991e-15
														1.813	-8.53624e-15	1.69227e-15
														1.814	-2.0629e-15	1.69227e-15
														1.815	3.19603e-15	8.22044e-16
														1.816	7.1408e-16	-1.91435e-15
														1.817	7.1408e-16	-4.6952e-15
														1.818	-2.41535e-15	-7.11159e-15
														1.819	-2.84794e-15	-7.11159e-15
														1.82	-2.84794e-15	-5.65664e-16
														1.821	-5.11914e-16	8.25644e-15
														1.822	-5.11914e-16	8.25644e-15
														1.823	-6.68389e-17	3.43247e-15
														1.824	-3.86144e-15	3.43247e-15
														1.825	-3.86144e-15	-8.14872e-16
														1.826	1.98307e-15	-1.05214e-15
														1.827	7.99401e-15	2.106e-15
														1.828	7.99401e-15	-2.42801e-15
														1.829	7.93655e-15	1.35612e-15
														1.83	3.50608e-15	2.66349e-15
														1.831	6.73388e-16	-1.87052e-15
														1.832	6.73388e-16	-6.11029e-16
														1.833	6.73388e-16	-6.11029e-16
														1.834	-3.30899e-16	3.31169e-15
														1.835	3.39148e-16	5.70058e-15
														1.836	3.06191e-16	5.70058e-15
														1.837	3.81762e-16	4.68073e-15
														1.838	3.81762e-16	3.39369e-15
														1.839	3.79929e-16	3.95556e-15
														1.84	-9.90281e-16	9.33737e-15
														1.841	-3.62608e-15	8.05033e-15
														1.842	-2.22475e-15	9.43537e-15
														1.843	-4.21388e-16	2.04171e-15
														1.844	-1.61617e-15	2.04171e-15
														1.845	4.30379e-15	3.85627e-15
														1.846	-1.24721e-15	1.13956e-15
														1.847	-7.16717e-15	1.13956e-15
														1.848	-4.14765e-15	1.13956e-15
														1.849	-4.14765e-15	-2.26133e-15
														1.85	1.50593e-15	3.51712e-15
														1.851	3.35656e-15	1.18493e-14
														1.852	5.81727e-15	9.40281e-15
														1.853	4.95089e-15	1.26572e-14
														1.854	-6.39041e-16	1.0498e-14
														1.855	-1.85399e-15	6.4117e-15
														1.856	-1.85399e-15	6.00174e-15
														1.857	-2.0165e-15	2.1794e-15
														1.858	1.46065e-15	2.1794e-15
														1.859	2.07919e-15	2.60129e-15
														1.86	5.5102e-17	6.20962e-16
														1.861	5.5102e-17	7.0625e-15
														1.862	-1.53086e-15	7.0625e-15
														1.863	-1.53086e-15	3.2867e-15
														1.864	-3.36175e-15	7.88623e-15
														1.865	-2.69973e-15	1.8467e-15
														1.866	2.44774e-15	9.20895e-15
														1.867	2.15296e-15	1.09611e-14
														1.868	4.35292e-15	2.83683e-15
														1.869	1.05987e-15	1.09611e-14
														1.87	-1.61084e-15	7.33864e-15
														1.871	-9.83509e-16	5.81108e-15
														1.872	-2.36467e-15	6.91623e-15
														1.873	-9.83509e-16	6.91623e-15
														1.874	-1.26659e-15	7.43096e-15
														1.875	-2.39502e-15	7.91165e-15
														1.876	-2.82555e-15	9.65969e-15
														1.877	-2.82555e-15	1.03086e-14
														1.878	-2.91434e-15	1.06135e-14
														1.879	-4.89951e-16	1.4943e-14
														1.88	2.30492e-15	1.06135e-14
														1.881	4.82146e-15	7.79302e-15
														1.882	4.82146e-15	6.10738e-15
														1.883	2.92911e-15	5.03957e-15
														1.884	3.66475e-15	7.39818e-15
														1.885	3.66475e-15	1.11468e-14
														1.886	3.66475e-15	1.0079e-14
														1.887	7.22831e-15	1.26101e-14
														1.888	6.01379e-15	8.37195e-15
														1.889	-9.50685e-16	4.67812e-15
														1.89	-2.30316e-17	7.69862e-15
														1.891	-2.30316e-17	6.06047e-15
														1.892	2.36276e-15	1.32896e-14
														1.893	3.51256e-15	1.32896e-14
														1.894	4.70313e-15	9.77754e-15
														1.895	3.07444e-15	9.09366e-15
														1.896	6.38029e-15	7.0541e-15
														1.897	8.19037e-15	9.39936e-15
														1.898	8.36851e-15	2.79539e-15
														1.899	1.05933e-14	1.25664e-15
														1.9	1.00692e-14	-3.80421e-16
														1.901	6.97392e-15	-6.06802e-15
														1.902	1.42281e-15	-1.60193e-15
														1.903	1.42281e-15	4.05786e-15
														1.904	1.42281e-15	6.31586e-15
														1.905	1.33598e-15	9.59886e-15
														1.906	4.47562e-15	7.31306e-15
														1.907	4.47562e-15	5.14981e-15
														1.908	6.01032e-15	2.77796e-15
														1.909	6.01032e-15	-1.55265e-15
														1.91	3.655e-15	-2.09891e-16
														1.911	-1.53983e-15	4.12072e-15
														1.912	-7.59488e-15	-2.09891e-16
														1.913	-7.59488e-15	-5.92318e-16
														1.914	-5.34516e-15	-1.09509e-15
														1.915	-7.09993e-15	-1.09509e-15
														1.916	-2.08647e-15	-8.84805e-16
														1.917	-2.08647e-15	-8.84805e-16
														1.918	-4.52538e-15	-2.90047e-15
														1.919	1.15097e-15	-2.90047e-15
														1.92	1.95827e-15	2.20902e-15
														1.921	4.56937e-15	8.24338e-15
														1.922	4.56937e-15	8.24338e-15
														1.923	4.06348e-15	8.88986e-15
														1.924	-3.44765e-16	5.77264e-15
														1.925	-5.3412e-15	-6.88728e-16
														1.926	-1.1928e-14	-6.88728e-16
														1.927	-1.1928e-14	-6.88728e-16
														1.928	-9.64785e-15	2.661e-16
														1.929	-5.55194e-15	2.64969e-15
														1.93	-1.86696e-15	2.64969e-15
														1.931	2.05352e-15	8.35425e-16
														1.932	8.14165e-15	-1.59606e-15
														1.933	8.66988e-15	-1.8034e-15
														1.934	8.55214e-15	-4.22256e-15
														1.935	7.96353e-15	-1.8034e-15
														1.936	3.17234e-15	-2.36819e-15
														1.937	1.07485e-15	-2.53508e-15
														1.938	-1.29727e-15	5.6079e-16
														1.939	-1.29727e-15	5.6079e-16
														1.94	-3.63491e-15	3.43462e-15
														1.941	-3.63491e-15	5.30642e-15
														1.942	-6.26702e-15	5.30642e-15
														1.943	-5.81339e-15	4.87269e-15
														1.944	-5.84667e-15	4.9871e-15
														1.945	-5.84667e-15	3.14616e-15
														1.946	-6.51919e-15	5.36903e-15
														1.947	-6.20412e-15	7.23459e-15
														1.948	-3.13474e-15	8.02068e-15
														1.949	2.50731e-17	8.39303e-15
														1.95	9.45677e-16	7.15153e-15
														1.951	2.17722e-15	6.68844e-15
														1.952	9.45677e-16	4.71944e-15
														1.953	1.56617e-15	4.71944e-15
														1.954	1.69444e-15	6.98355e-15
														1.955	2.17399e-15	7.65367e-15
														1.956	2.17399e-15	8.53092e-15
														1.957	1.30926e-16	7.65367e-15
														1.958	-1.19201e-15	6.68109e-15
														1.959	-1.19201e-15	3.9276e-15
														1.96	1.19162e-15	3.19181e-15
														1.961	3.3249e-15	3.19181e-15
														1.962	6.25777e-15	2.48261e-15
														1.963	3.3249e-15	6.82822e-15
														1.964	5.39985e-15	1.09856e-14
														1.965	3.27971e-15	4.61345e-15
														1.966	-6.06188e-15	1.19969e-14
														1.967	2.49714e-15	1.1956e-14
														1.968	-4.28074e-15	5.05058e-15
														1.969	-5.5512e-15	8.85691e-15
														1.97	-5.5512e-15	8.13738e-15
														1.971	-5.5512e-15	4.87333e-15
														1.972	-6.54714e-15	4.87333e-15
														1.973	-2.31343e-15	4.87333e-15
														1.974	7.28733e-16	6.13347e-15
														1.975	1.25219e-15	5.06149e-15
														1.976	6.26696e-15	6.64e-15
														1.977	2.57417e-15	6.64e-15
														1.978	-2.68562e-15	1.743e-15
														1.979	-8.37951e-15	9.78482e-15
														1.98	-1.48468e-14	1.40018e-14
														1.981	-1.02661e-14	1.15108e-14
														1.982	-2.10176e-15	1.19409e-14
														1.983	2.11182e-16	1.15108e-14
														1.984	2.11182e-16	1.0714e-14
														1.985	-2.07929e-15	5.56821e-15
														1.986	-2.07929e-15	5.56821e-15
														1.987	-3.05051e-15	5.80308e-15
														1.988	-2.85611e-15	1.20945e-15
														1.989	2.97406e-16	4.27305e-15
														1.99	-1.46756e-15	2.55407e-15
														1.991	-1.1308e-15	2.83647e-15
														1.992	6.34169e-16	4.19597e-15
														1.993	3.67699e-15	4.19597e-15
														1.994	6.47034e-15	3.77755e-15
														1.995	6.47034e-15	3.77755e-15
														1.996	4.26941e-15	6.05862e-15
[truncated: 43,001 more rows]

## Sheet: B
Legend : Data from Figure 4 –figure supplement 2, Data for B
					mEPSC amplitude							mEPSC frequency			Wave
		mEPSC amplitude	SEM		Ctrl	Tau			mEPSC frequency	SEM		Ctrl	Tau		time	Ctrl	Tau
	Ctrl	59.2268	2.96309		64.6156	63.4772		Ctrl	40.3303	11.8027		14.0509	7.32182		0	13.3269	1.65745
	Tau	61.0329	2.48524		61.951	64.3819		Tau	27.705	7.39676		45.2374	28.0456		0.01	14.2429	5.01435
					50.9284	53.656						31.9301	33.2487		0.02	5.08794	11.4231
					59.4122	62.6167						70.1026	42.2041		0.03	-7.73006	11.4231
															0.04	-17.4951	4.70925
															0.05	-22.3781	0.436751
															0.06	-20.2421	-5.36155
															0.07	-8.95106	-9.63405
															0.08	5.39294	-14.5168
															0.09	13.0219	-21.841
															0.1	17.2949	-24.8928
															0.11	12.4119	-21.841
															0.12	4.78194	-14.5168
															0.13	1.73094	-4.14085
															0.14	-1.62606	1.04705
															0.15	-5.28806	1.96265
															0.16	-3.15206	2.57295
															0.17	-0.711065	0.436751
															0.18	5.39294	-9.02375
															0.19	8.13894	-19.0945
															0.2	5.69794	-24.2824
															0.21	-2.23706	-26.4187
															0.22	0.204935	-20.3152
															0.23	6.30794	-12.3806
															0.24	7.52894	-11.7702
															0.25	2.64594	-12.0754
															0.26	0.204935	-9.32885
															0.27	-5.89906	-9.02375
															0.28	-4.67806	-7.49785
															0.29	-3.15206	-0.478749
															0.3	1.11994	3.18335
															0.31	3.25594	-2.61505
															0.32	11.4959	-8.71855
															0.33	11.8009	-6.88745
															0.34	4.47694	-1.08915
															0.35	-8.34006	7.45575
															0.36	-16.8851	14.4749
															0.37	-19.9371	18.4422
															0.38	-19.0211	14.1697
															0.39	-18.7161	4.70925
															0.4	-14.1391	-3.22535
															0.41	-8.95106	-8.10815
															0.42	-3.45706	-8.10815
															0.43	2.64594	-4.14085
															0.44	10.8859	0.741951
															0.45	15.1579	1.96265
															0.46	16.6839	-2.30985
															0.47	14.8529	-3.22535
															0.48	9.05494	-4.14085
															0.49	-1.93106	-5.05645
															0.5	-12.0021	-2.30985
															0.51	-19.3271	2.57295
															0.52	-22.9891	7.15065
															0.53	-20.5471	10.5076
															0.54	-15.0541	9.28685
															0.55	-8.64506	5.01435
															0.56	-4.06806	-2.61505
															0.57	-1.32106	-9.02375
															0.58	-1.62606	-10.5495
															0.59	3.86694	-14.5168
															0.6	15.1579	-20.6203
															0.61	20.3459	-21.841
															0.62	16.6839	-19.3996
															0.63	5.69794	-14.5168
															0.64	0.509935	-5.66675
															0.65	8.74994	-1.69945
															0.66	18.8199	-2.92015
															0.67	20.3459	1.35225
															0.68	12.7169	12.0335
															0.69	6.61294	12.0335
															0.7	4.17194	7.76095
															0.71	3.25594	3.18335
															0.72	6.91894	-1.69945
															0.73	10.2759	-4.75125
															0.74	7.52894	-5.05645
															0.75	-4.67806	-9.02375
															0.76	-19.3271	-12.3806
															0.77	-22.6831	-6.58225
															0.78	-14.4441	-3.22535
															0.79	1.42494	-7.19265
															0.8	17.5999	-10.5495
															0.81	24.0084	-7.80295
															0.82	22.7877	-2.61505
															0.83	16.9889	2.26785
															0.84	13.0219	7.45575
															0.85	9.05494	9.59205
															0.86	9.35994	6.54025
															0.87	7.83394	3.48855
															0.88	2.95094	-2.00465
															0.89	-4.67806	-5.97195
															0.9	-7.73006	-5.97195
															0.91	-1.93106	-2.00465
															0.92	9.35994	5.01435
															0.93	13.9379	5.01435
															0.94	11.1909	1.35225
															0.95	11.1909	1.04705
															0.96	10.2759	5.92995
															0.97	7.22394	8.98165
															0.98	2.03594	9.59205
															0.99	1.42494	7.45575
															1	3.56194	2.26785
															1.01	6.00294	-3.83575
															1.02	9.66494	-6.58225
															1.03	12.1069	-2.30985
															1.04	10.8859	8.06615
															1.05	6.30794	12.0335
															1.06	-1.62606	10.2024
															1.07	-11.6971	4.70925
															1.08	-19.3271	-0.783949
															1.09	-19.9371	-3.22535
															1.1	-12.6131	-5.05645
															1.11	-8.03506	-11.7702
															1.12	-4.67806	-24.2824
															1.13	5.39294	-27.9445
															1.14	18.5149	-19.3996
															1.15	25.8394	-2.92015
															1.16	18.5149	10.8128
															1.17	6.00294	18.4422
															1.18	-4.67806	17.8318
															1.19	-12.3071	15.6956
															1.2	-10.1711	10.5076
															1.21	-3.45706	5.01435
															1.22	2.64594	3.79365
															1.23	5.08794	2.87815
															1.24	3.86694	5.01435
															1.25	-3.45706	8.06615
															1.26	-15.0541	15.6956
															1.27	-22.0731	16.0008
															1.28	-26.6511	11.118
															1.29	-29.0921	3.18335
															1.3	-24.2091	-3.22535
															1.31	-12.6131	-4.14085
															1.32	-2.54206	-5.05645
															1.33	3.25594	-6.88745
															1.34	5.39294	-5.05645
															1.35	5.69794	7.15065
															1.36	1.42494	22.1043
															1.37	-6.20406	28.513
															1.38	-13.5281	18.137
															1.39	-17.8011	0.741951
															1.4	-15.6641	-10.8547
															1.41	-11.3921	-10.2444
															1.42	-2.84706	-4.44605
															1.43	12.7169	-2.30985
															1.44	24.3135	-4.14085
															1.45	24.9239	-7.19265
															1.46	15.4639	-2.92015
															1.47	0.814935	-0.173649
															1.48	-10.4761	-2.61505
															1.49	-10.1711	-7.80295
															1.5	2.34094	-8.10815
															1.51	9.66494	-4.14085
															1.52	7.52894	-6.27715
															1.53	6.00294	-9.63405
															1.54	13.0219	-8.71855
															1.55	13.9379	-2.61505
															1.56	7.22394	6.84545
															1.57	0.814935	15.0852
															1.58	-1.01606	13.2542
															1.59	-4.37306	2.57295
															1.6	-8.64506	-3.83575
															1.61	-4.37306	-6.27715
															1.62	5.08794	-10.5495
															1.63	10.2759	-16.653
															1.64	10.2759	-26.1135
															1.65	8.74994	-34.6584
															1.66	9.35994	-28.2497
															1.67	13.6319	-15.4323
															1.68	10.5809	1.04705
															1.69	3.25594	13.2542
															1.7	-0.100065	17.5266
															1.71	6.61294	15.0852
															1.72	18.8199	14.7801
															1.73	25.2291	11.7283
															1.74	23.398	3.18335
															1.75	14.5479	-6.27715
															1.76	1.42494	-7.19265
															1.77	-8.03506	-7.49785
															1.78	-7.11906	-6.58225
															1.79	2.64594	0.741951
															1.8	16.0739	5.62475
															1.81	22.1773	2.57295
															1.82	21.2618	-5.66675
															1.83	13.0219	-12.9909
															1.84	9.35994	-9.02375
															1.85	11.1909	4.09885
															1.86	16.3789	16.3059
															1.87	18.8199	21.7991
															1.88	9.35994	21.1888
															1.89	-7.11906	17.8318
															1.9	-13.5281	15.0852
															1.91	-6.50906	13.5594
															1.92	-1.62606	8.67645
															1.93	-3.15206	3.79365
															1.94	-0.406065	3.18335
															1.95	2.34094	11.118
															1.96	1.42494	9.89715
															1.97	1.42494	3.18335
															1.98	5.69794	3.79365
															1.99	7.22394	6.23505
															2	8.44394	9.59205
															2.01	6.91894	6.54025
															2.02	9.05494	1.04705
															2.03	15.4639	-2.92015
															2.04	20.9566	-14.2116
															2.05	18.5149	-21.841
															2.06	15.7689	-11.7702
															2.07	13.3269	4.70925
															2.08	6.61294	7.76095
															2.09	2.95094	1.96265
															2.1	6.91894	2.87815
															2.11	6.00294	6.23505
															2.12	-7.11906	2.26785
															2.13	-17.1901	-3.83575
															2.14	-12.6131	-11.1599
															2.15	9.96994	-23.3669
															2.16	30.7222	-27.3342
															2.17	36.2154	-20.3152
															2.18	27.0601	-3.53055
															2.19	19.1259	11.118
															2.2	10.5809	16.9163
															2.21	4.17194	15.3904
															2.22	-1.32106	8.06615
															2.23	-7.73006	6.23505
															2.24	-12.6131	7.76095
															2.25	-15.6641	8.98165
															2.26	-13.5281	5.31955
															2.27	-5.89906	6.23505
															2.28	12.7169	5.31955
															2.29	29.1963	-0.478749
															2.3	33.774	-7.80295
															2.31	29.5015	-9.02375
															2.32	18.2099	0.436751
															2.33	4.78194	7.45575
															2.34	-4.37306	3.79365
															2.35	-5.28806	-9.93925
															2.36	1.42494	-24.8928
															2.37	6.61294	-26.7238
															2.38	14.8529	-14.822
															2.39	19.7359	5.01435
															2.4	21.8721	19.3577
															2.41	24.6187	22.4095
															2.42	24.3135	18.137
															2.43	17.5999	9.59205
															2.44	7.22394	0.741951
															2.45	-7.73006	-2.61505
															2.46	-15.9701	-5.05645
															2.47	-8.03506	-8.41335
															2.48	5.08794	-13.6013
															2.49	16.6839	-8.71855
															2.5	18.5149	1.04705
															2.51	11.8009	8.37135
															2.52	3.25594	9.28685
															2.53	2.03594	7.76095
															2.54	7.52894	-5.05645
															2.55	16.0739	-21.2307
															2.56	20.0409	-33.1325
															2.57	21.8721	-33.7429
															2.58	16.6839	-23.6721
															2.59	5.39294	-4.75125
															2.6	-3.15206	5.01435
															2.61	-8.34006	8.06615
															2.62	-11.0871	6.23505
															2.63	-11.3921	6.84545
															2.64	-16.8851	7.76095
															2.65	-21.1581	6.23505
															2.66	-25.4301	-6.58225
															2.67	-28.7871	-14.822
															2.68	-31.8391	-12.9909
															2.69	-38.2471	-3.22535
															2.7	-48.9291	9.89715
															2.71	-57.7791	19.3577
															2.72	-59.3051	15.6956
															2.73	-58.3891	1.04705
															2.74	-61.4411	-14.822
															2.75	-64.1871	-20.01
															2.76	-66.0181	-15.7375
															2.77	-74.5631	-7.80295
															2.78	-84.0241	-2.61505
															2.79	-82.4981	2.57295
															2.8	-73.9531	0.741951
															2.81	-67.8491	-0.783949
															2.82	-66.3241	0.741951
															2.83	-61.4411	4.40405
															2.84	-60.5251	5.31955
															2.85	-65.4081	1.04705
															2.86	-76.3941	-5.36155
															2.87	-82.1931	-5.97195
															2.88	-74.2581	-7.80295
															2.89	-52.2851	-7.80295
															2.9	-34.2801	-6.27715
															2.91	-27.5661	-0.173649
															2.92	-23.5991	5.01435
															2.93	-22.6831	9.89715
															2.94	-26.0401	8.37135
															2.95	-34.5851	7.76095
															2.96	-47.4031	5.92995
															2.97	-51.0651	3.79365
															2.98	-47.4031	-0.173649
															2.99	-39.7731	-2.92015
															3	-29.3971	-5.36155
															3.01	-24.2091	-4.14085
															3.02	-22.0731	3.18335
															3.03	-19.3271	17.5266
															3.04	-18.1061	22.4095
															3.05	-21.7681	15.6956
															3.06	-23.9041	2.57295
															3.07	-16.2751	-9.63405
															3.08	-4.67806	-19.3996
															3.09	-1.93106	-22.7566
															3.1	-4.98306	-14.822
															3.11	-7.73006	-1.69945
															3.12	-10.1711	13.2542
															3.13	-11.0871	21.4939
															3.14	-4.37306	24.2405
															3.15	2.64594	23.6302
															3.16	6.91894	19.0525
															3.17	10.2759	10.8128
															3.18	18.2099	4.70925
															3.19	18.2099	4.70925
															3.2	6.61294	8.98165
															3.21	-9.86606	14.4749
															3.22	-20.2421	18.7473
															3.23	-14.4441	19.0525
															3.24	-1.32106	17.5266
															3.25	12.1069	14.4749
															3.26	17.2949	10.5076
															3.27	15.4639	6.54025
															3.28	9.05494	-0.173649
															3.29	-3.45706	-5.05645
															3.3	-14.4441	-11.1599
															3.31	-20.2421	-12.0754
															3.32	-11.3921	-1.69945
															3.33	6.61294	9.89715
															3.34	24.9239	12.949
															3.35	33.1636	8.67645
															3.36	29.5015	5.31955
															3.37	23.0928	2.87815
															3.38	18.8199	-0.478749
															3.39	16.0739	-6.88745
															3.4	11.1909	-12.3806
															3.41	0.204935	-14.822
															3.42	-6.50906	-11.7702
															3.43	-4.37306	-10.5495
															3.44	3.86694	-10.2444
															3.45	15.4639	-10.2444
															3.46	24.6187	-7.19265
															3.47	16.0739	-10.8547
															3.48	0.509935	-12.0754
															3.49	-13.2231	-13.6013
															3.5	-13.2231	-14.5168
															3.51	-4.98306	-15.7375
															3.52	4.17194	-9.63405
															3.53	9.96994	4.40405
															3.54	9.96994	17.8318
															3.55	6.91894	17.2215
															3.56	-0.406065	13.5594
															3.57	-7.11906	8.98165
															3.58	-7.73006	6.84545
															3.59	-7.42506	12.6438
															3.6	-7.73006	16.9163
															3.61	-7.11906	12.6438
															3.62	-1.62606	8.98165
															3.63	2.03594	7.45575
															3.64	6.00294	4.09885
															3.65	8.74994	-9.32885
															3.66	4.17194	-16.0427
															3.67	-0.100065	-17.5686
															3.68	1.73094	-18.1789
															3.69	5.39294	-15.1272
															3.7	9.05494	-5.36155
															3.71	9.66494	5.01435
															3.72	9.96994	14.1697
															3.73	6.61294	14.4749
															3.74	6.61294	8.06615
															3.75	12.1069	-0.173649
															3.76	14.5479	-3.22535
															3.77	16.6839	-3.53055
															3.78	19.7359	-1.39435
															3.79	12.7169	-5.97195
															3.8	0.204935	-11.4651
															3.81	-12.9181	-16.653
															3.82	-10.1711	-19.3996
															3.83	6.00294	-15.4323
															3.84	17.5999	-10.2444
															3.85	18.8199	-5.66675
															3.86	10.2759	-4.14085
															3.87	2.34094	-6.88745
															3.88	1.11994	-8.41335
															3.89	-0.406065	-3.83575
															3.9	-7.42506	5.01435
															3.91	-13.8331	10.2024
															3.92	-12.9181	9.59205
															3.93	-2.54206	9.89715
															3.94	7.83394	12.949
															3.95	17.2949	12.949
															3.96	20.9566	6.23505
															3.97	13.0219	-3.22535
															3.98	0.509935	-9.32885
															3.99	-8.34006	-12.0754
															4	-8.34006	-9.93925
															4.01	-3.76306	-7.80295
															4.02	2.64594	-2.00465
															4.03	12.7169	3.18335
															4.04	19.4309	8.37135
															4.05	18.8199	9.59205
															4.06	15.7689	9.59205
															4.07	13.6319	5.01435
															4.08	9.66494	-2.92015
															4.09	2.95094	-9.93925
															4.1	-5.59406	-9.63405
															4.11	-13.2231	-4.75125
															4.12	-10.7821	3.79365
															4.13	-4.98306	8.67645
															4.14	-5.59406	1.04705
															4.15	-2.54206	-14.2116
															4.16	0.509935	-24.8928
															4.17	2.34094	-18.7893
															4.18	-0.100065	-3.53055
															4.19	2.95094	8.06615
															4.2	9.66494	18.4422
															4.21	16.3789	19.6629
															4.22	16.9889	8.37135
															4.23	13.3269	-9.02375
															4.24	4.78194	-21.841
															4.25	4.47694	-20.3152
															4.26	2.64594	-9.32885
															4.27	-1.01606	-0.478749
															4.28	-5.28806	5.01435
															4.29	-4.06806	1.35225
															4.3	-6.20406	-2.61505
															4.31	-1.62606	-2.30985
															4.32	4.47694	-1.08915
															4.33	9.96994	1.96265
															4.34	10.8859	5.01435
															4.35	11.8009	3.48855
															4.36	5.69794	1.04705
															4.37	5.69794	-0.173649
															4.38	9.35994	-0.478749
															4.39	12.7169	3.79365
															4.4	11.1909	9.89715
															4.41	4.78194	16.9163
															4.42	1.42494	25.7664
															4.43	4.47694	33.3958
															4.44	8.13894	37.9734
															4.45	11.1909	35.2268
															4.46	9.96994	25.156
															4.47	11.4959	14.7801
															4.48	10.2759	6.23505
															4.49	7.52894	3.48855
															4.5	8.74994	5.01435
															4.51	13.0219	8.67645
															4.52	19.7359	11.7283
															4.53	28.2808	10.5076
															4.54	33.4688	3.18335
															4.55	38.0464	0.131551
															4.56	35.2999	8.67645
															4.57	25.2291	17.5266
															4.58	8.74994	20.5784
															4.59	-1.01606	22.7146
															4.6	-5.89906	17.8318
															4.61	-0.100065	17.5266
															4.62	6.61294	20.5784
															4.63	11.1909	19.3577
															4.64	11.1909	11.118
															4.65	9.35994	4.09885
															4.66	2.34094	-6.58225
															4.67	-8.03506	-10.5495
															4.68	-12.0021	-11.4651
															4.69	-8.34006	-4.75125
															4.7	1.73094	-4.14085
															4.71	13.0219	-15.7375
															4.72	15.4639	-26.7238
															4.73	12.1069	-23.9773
															4.74	2.95094	-15.1272
															4.75	-4.98306	-10.8547
															4.76	-7.42506	-8.41335
															4.77	-1.01606	-3.53055
															4.78	5.39294	0.741951
															4.79	8.13894	5.31955
															4.8	9.96994	5.92995
															4.81	11.8009	3.79365
															4.82	15.1579	-2.30985
															4.83	20.0409	-8.10815
															4.84	16.9889	-11.4651
															4.85	2.34094	-10.2444
															4.86	-5.59406	-9.02375
															4.87	0.509935	-7.19265
															4.88	16.0739	-7.80295
															4.89	30.7222	-9.32885
															4.9	40.1827	-10.5495
															4.91	38.3516	-9.02375
															4.92	28.8912	-3.83575
															4.93	20.6514	5.92995
															4.94	15.1579	12.949
															4.95	12.4119	10.5076
															4.96	11.1909	5.01435
															4.97	2.95094	10.8128
															4.98	-3.15206	16.6111
															4.99	-4.98306	17.2215
															5	-5.89906	15.6956
															5.01	-5.59406	13.5594
															5.02	-3.45706	9.89715
															5.03	1.73094	4.09885
															5.04	6.00294	-3.53055
															5.05	8.13894	-8.71855
															5.06	15.7689	-11.4651
															5.07	18.8199	-10.2444
															5.08	16.6839	-16.9582
															5.09	9.35994	-21.841
															5.1	2.95094	-21.2307
															5.11	-2.54206	-12.6858
															5.12	-0.711065	1.65745
															5.13	4.47694	20.8836
															5.14	7.52894	28.8181
															5.15	6.30794	24.2405
															5.16	5.69794	15.3904
															5.17	6.00294	8.67645
															5.18	6.91894	4.09885
															5.19	4.17194	5.01435
															5.2	2.03594	5.92995
															5.21	3.25594	4.40405
															5.22	2.95094	-4.14085
															5.23	3.25594	-10.5495
															5.24	14.2429	-15.1272
															5.25	30.417	-15.7375
															5.26	36.8257	-13.9065
															5.27	26.7549	-8.41335
															5.28	9.35994	5.01435
															5.29	-3.76306	16.0008
															5.3	-5.28806	18.137
															5.31	-1.93106	16.0008
															5.32	3.25594	11.118
															5.33	3.25594	8.67645
															5.34	1.73094	5.01435
															5.35	-1.32106	0.131551
															5.36	-1.62606	-2.00465
															5.37	1.73094	1.65745
															5.38	12.7169	7.76095
															5.39	18.5149	12.949
															5.4	19.1259	12.6438
															5.41	12.7169	13.5594
															5.42	7.52894	6.84545
															5.43	3.56194	-1.39435
															5.44	6.30794	-12.0754
															5.45	11.1909	-15.4323
															5.46	16.0739	-12.9909
															5.47	14.5479	-5.97195
															5.48	14.8529	1.65745
															5.49	10.8859	8.67645
															5.5	11.4959	17.8318
															5.51	17.2949	19.6629
															5.52	25.8394	11.7283
															5.53	27.3653	0.741951
															5.54	24.9239	-2.61505
															5.55	16.0739	-1.08915
															5.56	6.30794	3.79365
															5.57	-1.62606	2.57295
															5.58	-3.45706	0.741951
															5.59	5.08794	-1.08915
															5.6	18.5149	-5.05645
															5.61	24.6187	-15.7375
															5.62	22.1773	-21.5359
															5.63	14.2429	-21.2307
															5.64	13.0219	-9.63405
															5.65	14.2429	3.79365
															5.66	15.7689	19.6629
															5.67	13.6319	25.156
															5.68	8.13894	23.325
															5.69	2.95094	16.6111
															5.7	-0.100065	11.7283
															5.71	3.86694	2.57295
															5.72	15.7689	-1.69945
															5.73	20.9566	-5.36155
															5.74	18.8199	-3.53055
															5.75	15.1579	-5.36155
															5.76	15.4639	0.741951
															5.77	16.9889	-2.00465
															5.78	20.9566	-9.93925
															5.79	19.7359	-22.1462
															5.8	14.5479	-13.9065
															5.81	10.5809	0.436751
															5.82	6.61294	11.118
															5.83	7.83394	5.01435
															5.84	10.2759	-3.22535
															5.85	9.66494	-12.9909
															5.86	4.17194	-10.5495
															5.87	1.42494	-3.53055
															5.88	7.83394	2.26785
															5.89	16.0739	1.04705
															5.9	23.7032	0.436751
															5.91	27.0601	-2.30985
															5.92	23.0928	-6.27715
															5.93	14.5479	-12.9909
															5.94	6.61294	-16.653
															5.95	-0.100065	-15.7375
															5.96	-6.20406	-4.75125
															5.97	-2.23706	5.31955
															5.98	7.83394	14.4749
															5.99	17.2949	12.6438
															6	21.2618	7.15065
															6.01	17.5999	1.65745
															6.02	9.66494	3.18335
															6.03	5.39294	5.62475
															6.04	4.78194	6.84545
															6.05	3.25594	2.87815
															6.06	-4.98306	-1.08915
															6.07	-5.28806	-5.36155
															6.08	2.95094	-5.36155
															6.09	5.39294	-4.44605
															6.1	0.509935	-7.49785
															6.11	-0.711065	-16.9582
															6.12	6.30794	-21.2307
															6.13	21.2618	-20.9255
															6.14	32.8585	-10.5495
															6.15	36.8257	0.741951
															6.16	28.586	8.37135
															6.17	18.2099	9.28685
															6.18	10.2759	4.40405
															6.19	9.05494	-6.27715
															6.2	7.52894	-10.2444
															6.21	2.95094	-5.66675
															6.22	-1.62606	4.70925
															6.23	-3.15206	11.7283
															6.24	1.73094	12.6438
															6.25	11.1909	14.1697
															6.26	16.9889	14.7801
															6.27	14.5479	8.06615
															6.28	8.13894	-3.22535
															6.29	2.03594	-15.1272
															6.3	-0.100065	-18.1789
															6.31	-0.711065	-12.9909
															6.32	1.73094	-4.75125
															6.33	4.17194	-2.00465
															6.34	4.47694	-5.66675
															6.35	10.5809	1.96265
															6.36	16.0739	8.67645
															6.37	17.9049	11.118
															6.38	12.4119	11.118
															6.39	4.17194	11.7283
															6.4	-1.93106	9.59205
															6.41	-0.711065	2.57295
															6.42	3.86694	-9.63405
															6.43	8.44394	-16.3479
															6.44	10.2759	-16.9582
															6.45	8.44394	-11.7702
															6.46	2.03594	-12.6858
															6.47	4.17194	-14.2116
															6.48	10.8859	-8.41335
															6.49	19.4309	1.04705
															6.5	24.3135	2.87815
															6.51	20.6514	1.04705
															6.52	16.0739	-4.14085
															6.53	14.2429	-8.10815
															6.54	7.22394	-15.7375
															6.55	-0.406065	-13.6013
															6.56	-2.84706	-8.41335
															6.57	4.17194	-2.30985
															6.58	14.2429	1.65745
															6.59	23.398	6.54025
															6.6	28.2808	-1.08915
															6.61	25.8394	-11.7702
															6.62	12.4119	-22.1462
															6.63	2.64594	-27.3342
															6.64	2.34094	-21.841
															6.65	9.96994	-2.61505
															6.66	14.8529	7.45575
															6.67	23.398	12.0335
															6.68	27.6705	7.15065
															6.69	30.1119	-1.08915
															6.7	20.3459	-12.0754
															6.71	8.74994	-12.9909
															6.72	0.814935	-14.5168
															6.73	3.86694	-18.4841
															6.74	8.44394	-22.4514
															6.75	19.4309	-18.4841
															6.76	23.7032	-14.2116
															6.77	26.4498	-11.1599
															6.78	23.0928	-8.10815
															6.79	13.3269	1.35225
															6.8	-0.100065	4.70925
															6.81	-8.95106	4.09885
															6.82	-6.50906	3.18335
															6.83	5.69794	8.98165
															6.84	12.4119	12.0335
															6.85	11.1909	16.3059
															6.86	8.44394	15.6956
															6.87	6.30794	15.3904
															6.88	-3.15206	9.89715
															6.89	-17.8011	4.40405
															6.9	-21.7681	-1.69945
															6.91	-15.3591	-4.14085
															6.92	1.11994	-5.97195
															6.93	11.8009	-6.58225
															6.94	19.4309	-4.75125
															6.95	20.6514	0.131551
															6.96	14.2429	0.741951
															6.97	2.03594	1.35225
															6.98	-0.100065	-7.19265
															6.99	0.509935	-10.5495
															7	7.22394	-10.2444
															7.01	9.66494	-4.75125
															7.02	9.05494	-2.00465
															7.03	2.64594	0.741951
															7.04	-0.711065	4.09885
															7.05	-1.32106	3.79365
															7.06	4.47694	-0.173649
															7.07	8.74994	-0.173649
															7.08	13.0219	-3.53055
															7.09	12.7169	-9.93925
															7.1	10.8859	-14.822
															7.11	6.00294	-11.4651
															7.12	7.52894	-3.83575
															7.13	9.05494	13.8645
															7.14	11.8009	30.9544
															7.15	15.1579	34.9217
															7.16	15.7689	24.2405
															7.17	11.1909	7.76095
															7.18	13.0219	0.436751
															7.19	10.2759	-0.173649
															7.2	8.44394	-0.783949
															7.21	1.73094	-1.08915
															7.22	2.03594	4.09885
															7.23	-5.89906	8.67645
															7.24	-10.4761	3.48855
															7.25	-10.7821	-2.61505
															7.26	-2.84706	-11.1599
															7.27	7.22394	-18.7893
															7.28	20.3459	-24.8928
															7.29	20.9566	-25.5031
															7.3	19.7359	-27.3342
															7.31	13.9379	-29.1653
															7.32	7.83394	-29.4704
															7.33	-4.98306	-31.9118
															7.34	-19.0211	-27.9445
															7.35	-35.1961	-21.5359
															7.36	-36.1111	-19.3996
															7.37	-18.4111	-24.8928
															7.38	11.1909	-39.8464
															7.39	25.8394	-50.8331
															7.4	28.586	-49.9171
															7.41	19.7359	-45.9501
															7.42	13.9379	-41.9831
															7.43	7.83394	-41.0671
															7.44	2.34094	-42.2881
															7.45	-4.67806	-52.3591
															7.46	-3.76306	-65.4811
															7.47	0.204935	-78.2981
															7.48	3.56194	-80.7401
															7.49	4.78194	-77.3831
															7.5	15.7689	-68.5331
															7.51	15.1579	-53.5791
															7.52	7.22394	-41.3721
															7.53	-2.23706	-30.6911
															7.54	-4.67806	-27.3342
															7.55	5.39294	-32.8274
															7.56	18.5149	-40.4571
															7.57	18.8199	-42.2881
															7.58	10.5809	-44.7291
															7.59	-1.32106	-51.1381
															7.6	-5.89906	-60.5981
															7.61	1.73094	-59.9881
															7.62	15.4639	-56.9361
															7.63	24.9239	-46.5601
															7.64	33.1636	-29.1653
															7.65	32.2481	-8.71855
															7.66	22.4825	1.04705
															7.67	8.44394	-4.44605
															7.68	-2.23706	-20.3152
															7.69	-7.42506	-38.3205
															7.7	-0.406065	-45.9501
															7.71	6.00294	-45.3391
															7.72	11.8009	-34.0481
															7.73	13.3269	-20.9255
															7.74	16.9889	-13.9065
															7.75	15.1579	-9.32885
															7.76	10.5809	-3.83575
															7.77	2.95094	-3.22535
															7.78	3.56194	-7.19265
															7.79	14.2429	-12.6858
															7.8	19.7359	-15.7375
															7.81	24.3135	-16.9582
															7.82	25.8394	-18.7893
															7.83	18.2099	-15.1272
															7.84	10.8859	-9.02375
															7.85	10.8859	-5.97195
															7.86	6.91894	-4.44605
															7.87	4.17194	-4.14085
															7.88	-1.32106	-1.69945
															7.89	-3.15206	0.741951
															7.9	1.11994	3.48855
															7.91	8.44394	7.76095
															7.92	14.5479	13.5594
															7.93	18.5149	20.2732
															7.94	16.9889	20.2732
															7.95	17.2949	16.3059
															7.96	13.9379	6.84545
															7.97	4.17194	0.131551
															7.98	-4.67806	-2.61505
															7.99	-4.98306	-2.92015
															8	-0.406065	2.57295
															8.01	2.95094	5.92995
															8.02	-0.100065	2.87815
															8.03	1.42494	-3.22535
															8.04	-1.93106	-4.44605
															8.05	-6.81406	1.65745
															8.06	-5.59406	11.118
															8.07	7.22394	17.8318
															8.08	21.2618	19.3577
															8.09	25.5342	11.4231
															8.1	12.4119	1.35225
															8.11	-9.86606	-2.30985
															8.12	-21.4631	-3.83575
															8.13	-11.6971	-4.14085
															8.14	-0.711065	-0.173649
															8.15	11.4959	12.3387
															8.16	12.7169	19.6629
															8.17	13.3269	17.2215
															8.18	15.4639	11.118
															8.19	10.8859	2.57295
															8.2	1.73094	-3.83575
															8.21	-5.59406	-4.14085
															8.22	-19.3271	-0.478749
															8.23	-20.2421	6.54025
															8.24	-1.93106	10.2024
															8.25	22.4825	4.09885
															8.26	28.2808	-5.36155
															8.27	22.7877	-6.58225
															8.28	8.74994	-0.478749
															8.29	5.39294	6.54025
															8.3	6.91894	9.59205
															8.31	9.66494	8.37135
															8.32	9.05494	1.65745
															8.33	11.1909	-0.478749
															8.34	12.7169	2.57295
															8.35	14.8529	8.06615
															8.36	8.74994	11.4231
															8.37	4.17194	13.5594
															8.38	-1.01606	5.31955
															8.39	-3.45706	-3.83575
															8.4	-9.86606	-4.44605
															8.41	-14.4441	2.87815
															8.42	-14.7491	12.6438
															8.43	-3.76306	14.4749
															8.44	6.91894	8.67645
															8.45	25.2291	-2.92015
															8.46	35.2999	-15.4323
															8.47	34.9947	-24.8928
															8.48	24.9239	-19.7048
															8.49	15.1579	-6.27715
															8.5	4.78194	3.79365
															8.51	0.509935	3.48855
															8.52	-2.84706	5.31955
															8.53	-0.406065	7.15065
															8.54	5.39294	4.40405
															8.55	17.2949	-12.0754
															8.56	18.5149	-29.7756
															8.57	12.1069	-33.4377
															8.58	1.73094	-26.1135
															8.59	-4.06806	-14.2116
															8.6	-1.01606	-3.83575
															8.61	10.8859	3.79365
															8.62	15.7689	13.2542
															8.63	13.9379	11.4231
															8.64	7.22394	-2.00465
															8.65	9.05494	-12.3806
															8.66	15.4639	-12.0754
															8.67	25.2291	-4.14085
															8.68	23.0928	1.04705
															8.69	18.5149	1.04705
															8.7	12.4119	-1.08915
															8.71	15.1579	-1.08915
															8.72	13.9379	2.87815
															8.73	11.4959	4.09885
															8.74	3.86694	-0.173649
															8.75	-6.20406	-6.27715
															8.76	-18.7161	-13.6013
															8.77	-20.2421	-15.1272
															8.78	-15.9701	-2.00465
															8.79	-7.42506	13.2542
															8.8	6.91894	14.1697
															8.81	19.4309	1.65745
															8.82	25.2291	-7.80295
															8.83	26.4498	-8.71855
															8.84	26.4498	-3.22535
															8.85	23.398	2.87815
															8.86	18.2099	-1.08915
															8.87	9.35994	-0.173649
															8.88	-2.23706	-1.08915
															8.89	-11.3921	-5.05645
															8.9	-10.7821	-5.97195
															8.91	-4.67806	-2.61505
															8.92	4.17194	4.70925
															8.93	8.44394	9.28685
															8.94	6.30794	8.37135
															8.95	5.69794	5.01435
															8.96	4.78194	1.35225
															8.97	3.86694	2.57295
															8.98	5.39294	7.45575
															8.99	12.7169	5.62475
															9	19.7359	-1.69945
															9.01	25.8394	-13.2961
															9.02	31.6377	-21.841
															9.03	26.7549	-18.1789
															9.04	13.6319	-12.0754
															9.05	0.814935	-4.14085
															9.06	-5.89906	3.18335
															9.07	-7.73006	12.0335
															9.08	-5.28806	14.7801
															9.09	-2.84706	8.67645
															9.1	-0.406065	0.741951
															9.11	2.95094	-1.69945
															9.12	7.22394	-4.44605
															9.13	6.61294	-9.32885
															9.14	8.13894	-19.3996
															9.15	14.2429	-27.029
															9.16	16.0739	-20.3152
															9.17	11.8009	-4.14085
															9.18	6.30794	12.6438
															9.19	2.64594	24.2405
															9.2	5.39294	25.7664
															9.21	10.2759	10.8128
															9.22	18.5149	-12.0754
															9.23	28.2808	-26.7238
															9.24	28.2808	-27.3342
															9.25	19.1259	-18.1789
															9.26	1.11994	-8.10815
															9.27	-7.11906	-0.173649
															9.28	0.204935	0.741951
															9.29	8.44394	0.131551
															9.3	3.25594	-2.30985
															9.31	-10.7821	3.18335
															9.32	-13.5281	-0.478749
															9.33	-5.89906	-11.7702
															9.34	3.86694	-17.5686
															9.35	13.0219	-12.6858
															9.36	18.8199	0.131551
															9.37	21.5669	9.89715
															9.38	15.4639	7.45575
															9.39	3.56194	-2.30985
															9.4	-5.59406	-12.3806
															9.41	-7.42506	-12.6858
															9.42	0.814935	-5.36155
															9.43	11.4959	-0.478749
															9.44	13.0219	-1.08915
															9.45	8.13894	-6.27715
															9.46	-1.62606	-10.2444
															9.47	-7.42506	-5.97195
															9.48	-7.42506	4.09885
															9.49	-3.15206	6.23505
															9.5	4.17194	-3.22535
															9.51	5.39294	-10.2444
															9.52	4.78194	-10.5495
															9.53	15.1579	-7.19265
															9.54	30.417	0.436751
															9.55	36.8257	8.67645
															9.56	26.7549	17.2215
															9.57	9.35994	19.968
															9.58	-4.06806	17.2215
															9.59	-2.23706	12.949
															9.6	5.69794	10.2024
															9.61	11.4959	8.06615
															9.62	13.6319	8.06615
															9.63	7.83394	4.70925
															9.64	-1.32106	-3.83575
															9.65	-1.62606	-9.93925
															9.66	2.64594	-6.58225
															9.67	4.17194	1.04705
															9.68	-0.711065	8.67645
															9.69	-6.20406	20.8836
															9.7	-2.54206	27.2923
															9.71	7.22394	16.6111
															9.72	21.5669	-3.83575
															9.73	31.9429	-12.3806
															9.74	31.3326	-5.97195
															9.75	22.4825	1.96265
															9.76	9.96994	7.76095
															9.77	-2.23706	5.31955
															9.78	-8.03506	-2.30985
															9.79	-8.95106	-6.88745
															9.8	-6.50906	-12.9909
															9.81	-6.81406	-13.6013
															9.82	-5.28806	-13.2961
															9.83	-4.67806	-10.8547
															9.84	-3.76306	-9.32885
															9.85	-4.06806	-8.41335
															9.86	-9.86606	-2.30985
															9.87	-10.1711	9.28685
															9.88	0.204935	17.2215
															9.89	7.52894	16.0008
															9.9	8.13894	6.23505
															9.91	4.78194	-3.53055
															9.92	3.25594	-8.41335
															9.93	-0.100065	-3.53055
															9.94	-6.20406	4.40405
															9.95	-7.42506	5.31955
															9.96	-2.54206	-5.97195
															9.97	1.11994	-19.3996
															9.98	-3.76306	-24.5876
															9.99	-15.9701	-18.1789
															10	-20.5471	-6.27715
															10.01	-13.5281	5.01435
															10.02	1.42494	9.59205
															10.03	14.2429	7.15065
															10.04	19.4309	-2.30985
															10.05	18.5149	-8.10815
															10.06	16.9889	-7.49785
															10.07	16.9889	-5.66675
															10.08	15.4639	-8.41335
															10.09	11.4959	-10.2444
															10.1	8.13894	-7.49785
															10.11	6.00294	-2.61505
															10.12	5.08794	3.18335
															10.13	5.08794	6.84545
															10.14	4.47694	6.84545
															10.15	2.34094	3.48855
															10.16	-1.93106	-5.05645
															10.17	-1.01606	-12.9909
															10.18	10.2759	-10.8547
															10.19	23.0928	-1.69945
															10.2	25.8394	4.09885
															10.21	10.8859	3.48855
															10.22	-5.59406	1.35225
															10.23	-5.59406	3.79365
															10.24	2.34094	9.59205
															10.25	15.1579	10.5076
															10.26	26.7549	1.65745
															10.27	29.5015	-3.53055
															10.28	19.7359	-0.478749
															10.29	6.91894	0.741951
															10.3	-2.54206	0.436751
															10.31	-9.86606	-5.97195
															10.32	-14.1391	-10.2444
															10.33	-11.0871	-10.5495
															10.34	-0.100065	-9.63405
															10.35	7.83394	-1.39435
															10.36	8.13894	2.87815
															10.37	5.39294	1.04705
															10.38	2.95094	-0.478749
															10.39	-2.84706	1.35225
															10.4	-4.37306	4.40405
															10.41	6.61294	-0.173649
															10.42	18.8199	-6.27715
															10.43	24.0084	-10.5495
															10.44	23.398	-15.7375
															10.45	19.1259	-21.2307
															10.46	6.61294	-17.8737
															10.47	-1.93106	-6.27715
															10.48	0.204935	1.35225
															10.49	5.69794	7.45575
															10.5	10.8859	17.5266
															10.51	10.5809	23.9353
															10.52	0.814935	23.6302
															10.53	-8.34006	20.2732
															10.54	-8.34006	14.4749
															10.55	-1.32106	2.87815
															10.56	5.08794	-6.27715
															10.57	18.5149	-13.6013
															10.58	31.0274	-12.3806
															10.59	37.4361	-7.49785
															10.6	37.1309	-5.36155
															10.61	31.0274	-9.63405
															10.62	22.7877	-11.1599
															10.63	14.5479	-7.49785
															10.64	10.2759	-0.173649
															10.65	10.2759	8.37135
															10.66	9.35994	12.0335
															10.67	9.66494	2.26785
															10.68	3.86694	-6.58225
															10.69	0.204935	-7.19265
															10.7	7.22394	4.70925
															10.71	18.5149	9.89715
															10.72	23.0928	12.3387
															10.73	16.3789	9.59205
															10.74	3.25594	0.741951
															10.75	-0.406065	-7.80295
															10.76	6.00294	-12.9909
															10.77	16.9889	-13.2961
															10.78	21.5669	-9.02375
															10.79	22.1773	-10.8547
															10.8	20.3459	-13.6013
															10.81	11.4959	-8.10815
															10.82	0.509935	-0.478749
															10.83	-5.59406	-3.83575
															10.84	-8.95106	-10.2444
															10.85	-13.5281	-12.6858
															10.86	-14.7491	-5.66675
															10.87	-5.89906	-2.00465
															10.88	0.814935	-4.14085
															10.89	-2.84706	-10.8547
															10.9	-9.56106	-10.5495
															10.91	-9.86606	-6.27715
															10.92	-5.28806	-7.80295
															10.93	-1.01606	-16.0427
															10.94	5.39294	-18.4841
															10.95	16.3789	-9.93925
															10.96	18.2099	0.741951
															10.97	6.61294	2.87815
															10.98	-8.64506	-3.83575
															10.99	-15.3591	-13.9065
															11	-12.0021	-15.4323
															11.01	-0.711065	-5.36155
															11.02	7.52894	7.76095
															11.03	10.5809	16.6111
															11.04	3.56194	20.5784
															11.05	-0.406065	20.8836
															11.06	2.64594	14.4749
															11.07	4.47694	7.76095
															11.08	0.814935	-1.39435
															11.09	-3.45706	-5.05645
															11.1	-0.711065	-4.14085
															11.11	7.52894	-0.783949
															11.12	17.2949	4.40405
															11.13	27.0601	5.92995
															11.14	30.1119	7.76095
															11.15	27.3653	5.92995
															11.16	20.6514	-5.36155
															11.17	10.5809	-20.01
															11.18	3.86694	-33.4377
															11.19	0.509935	-27.029
															11.2	1.11994	-7.19265
															11.21	3.25594	10.8128
															11.22	2.64594	11.118
															11.23	3.25594	0.436751
															11.24	7.52894	-9.63405
															11.25	10.8859	-13.6013
															11.26	9.96994	-7.80295
															11.27	6.30794	1.65745
															11.28	5.69794	7.76095
															11.29	8.74994	10.2024
															11.3	15.4639	2.57295
															11.31	21.5669	-9.93925
															11.32	21.2618	-21.5359
															11.33	14.8529	-22.7566
															11.34	7.52894	-19.0945
															11.35	1.42494	-16.3479
															11.36	-2.54206	-15.4323
															11.37	0.509935	-16.0427
															11.38	2.03594	-10.8547
															11.39	3.56194	1.35225
															11.4	7.83394	12.949
															11.41	12.1069	22.7146
															11.42	9.05494	23.0198
															11.43	3.86694	20.2732
															11.44	9.35994	16.6111
															11.45	18.5149	13.5594
															11.46	15.4639	5.62475
															11.47	7.83394	-0.478749
															11.48	6.00294	-5.05645
															11.49	9.66494	-4.75125
															11.5	11.4959	-7.19265
															11.51	11.4959	-5.36155
															11.52	17.2949	0.741951
															11.53	13.3269	6.23505
															11.54	-3.15206	8.67645
															11.55	-19.0211	9.59205
															11.56	-20.5471	5.62475
															11.57	-11.3921	3.48855
															11.58	-1.32106	4.40405
															11.59	-1.01606	8.67645
															11.6	-1.01606	10.5076
															11.61	2.34094	11.118
															11.62	12.4119	5.62475
															11.63	24.3135	2.57295
															11.64	31.9429	-3.83575
															11.65	31.6377	-8.10815
															11.66	22.1773	-12.6858
															11.67	11.8009	-10.8547
															11.68	4.78194	-9.93925
															11.69	-0.406065	-12.9909
															11.7	-2.23706	-18.1789
															11.71	-6.20406	-13.2961
															11.72	-7.42506	-6.27715
															11.73	-4.06806	8.67645
															11.74	0.509935	19.0525
															11.75	1.73094	21.7991
															11.76	-4.67806	17.2215
															11.77	-7.42506	6.84545
															11.78	2.34094	-5.66675
															11.79	12.1069	-11.4651
															11.8	22.4825	-10.5495
															11.81	29.5015	-3.83575
															11.82	26.7549	-2.00465
															11.83	19.4309	-6.27715
															11.84	12.1069	-10.8547
															11.85	2.64594	-6.88745
															11.86	-5.59406	4.40405
															11.87	-12.3071	18.4422
															11.88	-11.0871	24.8509
															11.89	-6.20406	26.0716
															11.9	2.95094	21.1888
															11.91	5.39294	10.8128
															11.92	2.34094	1.65745
															11.93	1.73094	1.04705
															11.94	6.91894	1.65745
															11.95	12.4119	4.40405
															11.96	15.1579	7.45575
															11.97	14.5479	8.67645
															11.98	15.1579	2.57295
															11.99	15.1579	-4.44605
															12	18.5149	-18.1789
															12.01	20.0409	-30.386
															12.02	19.1259	-30.9963
															12.03	14.5479	-16.9582
															12.04	11.8009	3.18335
															12.05	4.47694	18.7473
															12.06	1.11994	24.5457
															12.07	0.509935	14.4749
															12.08	-5.28806	-0.783949
															12.09	-16.5801	-10.2444
															12.1	-15.0541	-8.41335
															12.11	-7.42506	-0.173649
															12.12	3.56194	7.76095
															12.13	11.8009	5.31955
															12.14	19.7359	-5.66675
															12.15	20.9566	-14.5168
															12.16	14.5479	-10.2444
															12.17	2.64594	2.26785
															12.18	-10.4761	10.8128
															12.19	-16.8851	6.54025
															12.2	-12.9181	-0.173649
															12.21	-1.93106	-2.30985
															12.22	9.05494	4.40405
															12.23	16.0739	16.0008
															12.24	18.2099	26.6819
															12.25	16.9889	30.6492
															12.26	11.4959	24.2405
															12.27	-1.62606	14.1697
															12.28	-10.7821	1.96265
															12.29	-14.1391	-6.58225
															12.3	-5.28806	-6.58225
															12.31	10.5809	1.04705
															12.32	27.0601	5.62475
															12.33	39.2671	6.84545
															12.34	46.5914	5.01435
															12.35	40.4878	5.92995
															12.36	23.0928	12.949
															12.37	2.64594	20.2732
															12.38	-8.03506	19.6629
															12.39	-8.64506	5.31955
															12.4	-6.20406	-7.80295
															12.41	-4.37306	-16.9582
															12.42	-2.23706	-20.3152
															12.43	-8.95106	-9.63405
															12.44	-12.9181	9.59205
															12.45	-0.100065	20.8836
															12.46	21.8721	22.7146
															12.47	29.5015	15.3904
															12.48	20.0409	8.06615
															12.49	7.52894	5.62475
															12.5	-1.62606	6.23505
															12.51	-6.81406	3.48855
															12.52	-3.76306	2.26785
															12.53	2.64594	2.87815
															12.54	7.22394	1.96265
															12.55	4.78194	1.35225
															12.56	-1.32106	-0.173649
															12.57	-2.84706	-4.75125
															12.58	2.64594	-2.30985
															12.59	3.25594	4.70925
															12.6	3.25594	14.7801
															12.61	5.39294	12.949
															12.62	8.74994	7.15065
															12.63	6.00294	1.04705
															12.64	6.61294	-1.39435
															12.65	8.44394	-3.53055
															12.66	14.8529	-1.69945
															12.67	19.1259	-0.173649
															12.68	22.7877	2.57295
															12.69	21.8721	2.57295
															12.7	21.2618	4.09885
															12.71	21.8721	5.31955
															12.72	23.7032	10.5076
															12.73	25.2291	17.2215
															12.74	20.6514	15.6956
															12.75	10.8859	1.04705
															12.76	-5.59406	-12.6858
															12.77	-13.8331	-15.7375
															12.78	-8.34006	-1.69945
															12.79	2.95094	12.949
															12.8	10.2759	21.1888
															12.81	11.4959	18.7473
															12.82	13.0219	12.0335
															12.83	18.8199	3.18335
															12.84	16.3789	-2.30985
															12.85	7.22394	-9.02375
															12.86	2.95094	-15.7375
															12.87	8.44394	-24.5876
															12.88	8.74994	-21.5359
															12.89	8.13894	-17.5686
															12.9	8.74994	-7.19265
															12.91	7.22394	4.40405
															12.92	4.78194	17.2215
															12.93	3.56194	21.4939
															12.94	0.509935	20.2732
															12.95	-4.67806	12.3387
															12.96	-12.6131	1.04705
															12.97	-17.4951	-8.71855
															12.98	-16.8851	-11.4651
															12.99	-4.98306	-5.66675
															13	8.44394	11.7283
															13.01	14.5479	16.6111
															13.02	15.4639	8.06615
															13.03	19.7359	-9.63405
															13.04	21.2618	-23.0617
															13.05	23.0928	-25.5031
															13.06	23.398	-20.9255
															13.07	21.5669	-18.1789
															13.08	19.4309	-19.3996
															13.09	18.5149	-19.3996
															13.1	16.3789	-11.4651
															13.11	16.6839	1.35225
															13.12	16.3789	11.7283
															13.13	12.4119	14.4749
															13.14	6.30794	5.62475
															13.15	6.91894	-4.44605
															13.16	6.91894	-12.3806
															13.17	8.44394	-16.9582
															13.18	10.2759	-15.7375
															13.19	11.4959	-14.2116
															13.2	6.00294	-15.1272
															13.21	1.42494	-13.9065
															13.22	0.204935	-6.27715
															13.23	2.64594	0.131551
															13.24	2.34094	3.79365
															13.25	4.78194	4.40405
															13.26	3.25594	4.09885
															13.27	4.47694	3.18335
															13.28	1.73094	3.48855
															13.29	-2.23706	-0.478749
															13.3	-2.23706	-0.478749
															13.31	4.78194	4.40405
															13.32	3.56194	13.8645
															13.33	5.08794	20.8836
															13.34	8.44394	20.2732
															13.35	14.5479	17.2215
															13.36	18.2099	13.2542
															13.37	19.1259	8.37135
															13.38	16.0739	2.87815
															13.39	8.74994	-4.14085
															13.4	-0.711065	-12.6858
															13.41	-1.32106	-11.1599
															13.42	-4.37306	0.741951
															13.43	-8.34006	11.118
															13.44	-7.42506	14.7801
															13.45	-2.23706	8.06615
															13.46	3.86694	-4.44605
															13.47	12.7169	-14.822
															13.48	25.2291	-15.7375
															13.49	26.1446	-6.88745
															13.5	8.44394	3.18335
															13.51	-12.3071	10.5076
															13.52	-25.7351	17.5266
															13.53	-29.0921	20.2732
															13.54	-22.0731	12.3387
															13.55	-6.81406	0.436751
															13.56	4.17194	-6.27715
															13.57	10.5809	-8.41335
															13.58	11.1909	-4.14085
															13.59	7.52894	-3.53055
															13.6	6.61294	-8.71855
															13.61	5.69794	-11.7702
															13.62	5.08794	-9.32885
															13.63	2.03594	-5.97195
															13.64	-2.23706	-0.478749
															13.65	-0.100065	4.70925
															13.66	6.30794	4.70925
															13.67	9.05494	8.67645
															13.68	7.83394	12.949
															13.69	6.00294	13.2542
															13.7	4.78194	5.62475
															13.71	3.86694	-2.00465
															13.72	-1.32106	-3.83575
															13.73	-1.62606	-1.08915
															13.74	0.509935	-3.83575
															13.75	1.11994	-2.00465
															13.76	-6.81406	2.26785
															13.77	-13.8331	6.84545
															13.78	-7.42506	2.87815
															13.79	4.78194	1.35225
															13.8	16.9889	-0.783949
															13.81	18.5149	-7.80295
															13.82	16.3789	-18.1789
															13.83	8.74994	-22.4514
															13.84	-4.67806	-20.3152
															13.85	-15.0541	-13.9065
															13.86	-12.9181	-7.19265
															13.87	3.56194	0.741951
															13.88	22.7877	1.96265
															13.89	32.5533	10.8128
															13.9	31.3326	10.5076
															13.91	26.4498	4.70925
															13.92	19.4309	-8.10815
															13.93	12.1069	-17.2634
															13.94	4.17194	-20.9255
															13.95	1.42494	-14.5168
															13.96	5.08794	-9.63405
															13.97	18.8199	-1.39435
															13.98	29.5015	8.06615
															13.99	24.6187	17.5266
															14	16.0739	15.0852
															14.01	10.2759	9.28685
															14.02	4.47694	-3.83575
															14.03	-4.67806	-9.93925
															14.04	-7.42506	-9.93925
															14.05	-3.15206	-0.783949
															14.06	8.13894	5.92995
															14.07	21.2618	5.01435
															14.08	28.586	-0.478749
															14.09	23.7032	-5.97195
															14.1	16.0739	-5.36155
															14.11	10.5809	-0.478749
															14.12	9.96994	4.09885
															14.13	7.52894	4.70925
															14.14	11.8009	-2.61505
															14.15	14.8529	-9.93925
															14.16	15.1579	-14.5168
															14.17	14.8529	-9.63405
															14.18	12.4119	5.92995
															14.19	7.52894	18.137
															14.2	5.08794	24.2405
															14.21	1.11994	27.5974
															14.22	-3.45706	24.2405
															14.23	-0.100065	12.6438
															14.24	8.44394	6.23505
															14.25	13.3269	2.26785
															14.26	13.3269	-2.92015
															14.27	10.5809	-9.93925
															14.28	13.9379	-10.2444
															14.29	17.9049	-9.63405
															14.3	17.9049	-4.44605
															14.31	13.0219	2.26785
															14.32	12.7169	5.92995
															14.33	13.3269	-1.39435
															14.34	14.5479	-7.19265
															14.35	14.8529	-9.32885
															14.36	9.05494	-3.22535
															14.37	3.86694	2.87815
															14.38	7.22394	12.6438
															14.39	12.7169	19.6629
															14.4	10.2759	21.4939
															14.41	-1.62606	12.3387
															14.42	-11.3921	-3.22535
															14.43	-16.5801	-16.9582
															14.44	-8.03506	-22.7566
															14.45	8.44394	-18.7893
															14.46	18.2099	-6.88745
															14.47	18.2099	1.35225
															14.48	20.9566	2.57295
															14.49	22.7877	-6.88745
															14.5	20.3459	-16.3479
															14.51	13.0219	-22.4514
															14.52	8.44394	-15.7375
															14.53	5.39294	-9.02375
															14.54	-0.406065	-8.10815
															14.55	-2.84706	-12.3806
															14.56	6.00294	-8.41335
															14.57	15.7689	0.436751
															14.58	24.6187	13.8645
															14.59	20.9566	16.3059
															14.6	9.66494	13.2542
															14.61	-5.59406	0.741951
															14.62	-14.7491	-4.44605
															14.63	-17.1901	-2.30985
															14.64	-9.56106	8.37135
															14.65	8.13894	15.0852
															14.66	22.1773	17.5266
															14.67	29.8067	9.59205
															14.68	34.6895	2.57295
															14.69	30.1119	-5.66675
															14.7	19.4309	-6.58225
															14.71	4.78194	-6.27715
															14.72	-3.45706	-4.14085
															14.73	-0.711065	-5.97195
															14.74	8.13894	-4.14085
															14.75	16.0739	-6.58225
															14.76	13.6319	-2.61505
															14.77	10.8859	1.35225
															14.78	10.8859	9.89715
															14.79	7.22394	17.2215
															14.8	-0.100065	19.0525
															14.81	-10.7821	14.7801
															14.82	-10.7821	8.67645
															14.83	-1.01606	0.741951
															14.84	11.4959	-0.783949
															14.85	20.3459	1.65745
															14.86	17.9049	2.57295
															14.87	2.34094	3.48855
															14.88	-10.4761	10.8128
															14.89	-11.3921	11.4231
															14.9	2.03594	7.45575
															14.91	13.9379	2.87815
															14.92	17.2949	0.436751
															14.93	16.3789	1.96265
															14.94	15.4639	6.84545
															14.95	13.6319	4.40405
															14.96	8.44394	2.87815
															14.97	4.47694	9.28685
															14.98	2.95094	17.5266
															14.99	6.91894	21.4939
															15	15.4639	18.4422
															15.01	28.2808	7.45575
															15.02	28.2808	-2.30985
															15.03	17.2949	-9.02375
															15.04	-2.23706	-14.2116
															15.05	-7.11906	-14.5168
															15.06	-6.81406	-9.32885
															15.07	-2.54206	-4.14085
															15.08	-1.32106	-2.30985
															15.09	1.42494	-1.39435
															15.1	2.95094	-1.69945
															15.11	7.22394	-5.05645
															15.12	7.52894	-5.36155
															15.13	13.9379	-5.66675
															15.14	20.3459	2.57295
															15.15	27.6705	9.28685
															15.16	28.2808	3.48855
															15.17	28.2808	-7.80295
															15.18	19.7359	-18.7893
															15.19	11.8009	-25.8083
															15.2	2.95094	-19.7048
															15.21	-1.01606	-10.2444
															15.22	-2.54206	0.436751
															15.23	3.86694	1.04705
															15.24	9.66494	-6.58225
															15.25	18.2099	-14.5168
															15.26	18.5149	-12.9909
															15.27	21.8721	-4.14085
															15.28	19.1259	-0.478749
															15.29	12.4119	-0.173649
															15.3	1.73094	-3.22535
															15.31	0.509935	-5.66675
															15.32	3.25594	-5.05645
															15.33	12.1069	-1.69945
															15.34	16.0739	1.96265
															15.35	20.6514	3.48855
															15.36	20.9566	2.87815
															15.37	24.9239	3.79365
															15.38	19.7359	-5.36155
															15.39	7.83394	-15.1272
															15.4	-1.62606	-16.3479
															15.41	-1.93106	-4.14085
															15.42	-2.23706	9.89715
															15.43	2.64594	12.3387
															15.44	7.83394	1.65745
															15.45	11.1909	-4.14085
															15.46	6.91894	-0.783949
															15.47	8.13894	7.45575
															15.48	8.74994	12.6438
															15.49	-0.711065	19.0525
															15.5	-10.1711	19.6629
															15.51	-9.25606	19.3577
															15.52	-6.20406	12.0335
															15.53	1.11994	5.92995
															15.54	13.6319	1.96265
															15.55	23.7032	-1.69945
															15.56	21.2618	-5.66675
															15.57	11.1909	-0.478749
															15.58	-1.62606	4.09885
															15.59	-7.73006	8.06615
															15.6	-7.73006	6.23505
															15.61	-6.81406	6.84545
															15.62	-2.54206	11.118
															15.63	5.08794	15.0852
															15.64	9.96994	11.4231
															15.65	11.1909	5.31955
															15.66	12.7169	0.436751
															15.67	18.5149	1.35225
															15.68	25.2291	8.06615
															15.69	22.1773	10.2024
															15.7	16.6839	2.87815
															15.71	15.1579	-2.61505
															15.72	6.00294	-7.49785
															15.73	-4.37306	-8.41335
															15.74	-6.81406	-7.49785
															15.75	-4.06806	-2.92015
															15.76	1.11994	-1.39435
															15.77	5.39294	-2.30985
															15.78	11.1909	-12.6858
															15.79	11.1909	-13.2961
															15.8	10.8859	-7.19265
															15.81	6.61294	-1.08915
															15.82	4.78194	-5.05645
															15.83	8.13894	-6.88745
															15.84	11.4959	-9.32885
															15.85	13.6319	-7.80295
															15.86	16.0739	-7.80295
															15.87	15.1579	-4.44605
															15.88	10.2759	-4.75125
															15.89	-1.01606	1.96265
															15.9	-10.1711	3.18335
															15.91	-12.6131	3.18335
															15.92	-5.28806	-6.88745
															15.93	-0.100065	-14.2116
															15.94	6.00294	-18.7893
															15.95	9.66494	-21.5359
															15.96	8.44394	-19.3996
															15.97	2.34094	-15.4323
															15.98	9.96994	-14.822
															15.99	19.7359	-14.2116
															16	29.1963	-7.19265
															16.01	33.4688	-1.69945
															16.02	32.8585	-1.69945
															16.03	28.2808	0.741951
															16.04	21.2618	5.01435
															16.05	13.0219	3.79365
															16.06	8.44394	-1.69945
															16.07	3.25594	-10.8547
															16.08	6.00294	-16.9582
															16.09	11.1909	-15.7375
															16.1	15.7689	-4.75125
															16.11	18.5149	9.59205
															16.12	20.0409	14.7801
															16.13	11.1909	10.5076
															16.14	2.95094	2.87815
															16.15	-0.100065	1.96265
															16.16	6.30794	4.40405
															16.17	12.1069	1.35225
															16.18	15.7689	-0.173649
															16.19	14.5479	1.35225
															16.2	10.5809	-2.30985
															16.21	-0.100065	-0.783949
															16.22	-4.37306	4.40405
															16.23	-1.01606	15.0852
															16.24	7.52894	18.137
															16.25	10.8859	5.01435
															16.26	18.8199	-8.41335
															16.27	17.2949	-12.6858
															16.28	7.52894	-12.0754
															16.29	-4.37306	-13.6013
															16.3	-11.0871	-12.3806
															16.31	-18.4111	-1.69945
															16.32	-8.95106	6.23505
															16.33	8.13894	3.79365
															16.34	25.2291	-3.22535
															16.35	31.9429	-7.80295
															16.36	31.6377	-7.49785
															16.37	19.7359	-2.92015
															16.38	7.22394	3.18335
															16.39	-2.54206	5.92995
															16.4	-1.62606	2.87815
															16.41	2.64594	-1.69945
															16.42	6.61294	0.131551
															16.43	11.8009	0.741951
															16.44	17.5999	-4.75125
															16.45	17.5999	-12.0754
															16.46	12.7169	-9.93925
															16.47	2.34094	3.79365
															16.48	1.73094	16.6111
															16.49	12.7169	14.7801
															16.5	27.9756	5.01435
															16.51	28.586	-1.69945
															16.52	15.1579	-6.58225
															16.53	7.83394	-9.02375
															16.54	9.96994	-2.92015
															16.55	11.4959	11.118
															16.56	7.52894	20.2732
															16.57	1.73094	21.1888
															16.58	0.204935	20.5784
															16.59	-6.20406	19.0525
															16.6	-13.5281	12.949
															16.61	-17.4951	1.96265
															16.62	-9.25606	-9.32885
															16.63	-1.32106	-12.9909
															16.64	4.78194	-15.1272
															16.65	9.66494	-11.4651
															16.66	16.6839	0.131551
															16.67	23.7032	13.2542
															16.68	21.8721	22.4095
															16.69	12.4119	26.0716
															16.7	6.00294	21.7991
															16.71	5.39294	7.45575
															16.72	6.91894	-3.83575
															16.73	9.96994	-3.53055
															16.74	12.7169	4.40405
															16.75	11.4959	15.0852
															16.76	8.74994	17.2215
															16.77	7.52894	5.01435
															16.78	9.05494	-8.41335
															16.79	7.52894	-19.7048
															16.8	-1.32106	-20.3152
															16.81	-11.6971	-12.6858
															16.82	-17.4951	-5.97195
															16.83	-14.1391	-4.44605
															16.84	-2.23706	-8.41335
															16.85	15.7689	-13.2961
															16.86	27.6705	-15.1272
															16.87	32.8585	-9.93925
															16.88	29.1963	-2.30985
															16.89	19.1259	2.57295
															16.9	7.83394	4.09885
															16.91	3.86694	2.57295
															16.92	2.34094	-2.61505
															16.93	8.74994	-12.6858
															16.94	11.1909	-18.1789
															16.95	11.4959	-16.0427
															16.96	8.44394	-18.4841
															16.97	3.86694	-27.3342
															16.98	-1.62606	-27.6394
															16.99	-7.42506	-20.01
															17	-7.42506	-12.9909
															17.01	-5.59406	-8.41335
															17.02	0.814935	-2.61505
															17.03	13.0219	-4.14085
															17.04	22.4825	-9.02375
															17.05	22.7877	-10.5495
															17.06	15.1579	-10.8547
															17.07	3.25594	-11.4651
															17.08	1.73094	-10.2444
															17.09	4.47694	-5.36155
															17.1	2.95094	3.18335
															17.11	-1.62606	4.40405
															17.12	-6.81406	2.57295
															17.13	-8.03506	-4.14085
															17.14	-1.32106	-10.2444
															17.15	7.83394	-7.19265
															17.16	12.7169	-2.92015
															17.17	13.0219	-5.97195
															17.18	7.22394	-10.2444
															17.19	3.56194	-5.36155
															17.2	4.47694	9.89715
															17.21	5.39294	16.0008
															17.22	9.05494	15.3904
															17.23	14.2429	8.37135
															17.24	20.9566	1.04705
															17.25	23.398	-10.2444
															17.26	17.2949	-19.3996
															17.27	6.91894	-12.0754
															17.28	-1.32106	-5.97195
															17.29	-9.56106	-1.69945
															17.3	-7.73006	-2.00465
															17.31	0.204935	-2.61505
															17.32	6.00294	-2.92015
															17.33	7.22394	0.131551
															17.34	9.96994	-0.478749
															17.35	19.1259	-11.4651
															17.36	21.8721	-18.4841
															17.37	9.96994	-17.5686
															17.38	-8.03506	-4.44605
															17.39	-24.5141	12.6438
															17.4	-27.8711	8.06615
															17.41	-16.2751	-11.4651
															17.42	7.52894	-23.6721
															17.43	25.8394	-23.0617
															17.44	27.9756	-13.6013
															17.45	19.1259	-7.80295
															17.46	9.05494	-6.58225
															17.47	4.47694	-3.53055
															17.48	5.39294	-2.30985
															17.49	13.0219	-1.69945
															17.5	22.7877	-1.69945
															17.51	28.8912	-2.00465
															17.52	28.2808	-0.478749
															17.53	20.9566	-1.39435
															17.54	12.7169	-1.39435
															17.55	4.17194	-6.58225
															17.56	-1.93106	-14.5168
															17.57	-1.32106	-13.2961
															17.58	3.25594	-5.97195
															17.59	14.5479	1.35225
															17.6	23.0928	8.37135
															17.61	25.8394	16.0008
															17.62	24.3135	19.3577
															17.63	22.7877	12.3387
															17.64	13.9379	-0.783949
															17.65	5.69794	-12.6858
															17.66	4.17194	-16.3479
															17.67	5.69794	-13.6013
															17.68	5.69794	-9.02375
															17.69	2.03594	-2.61505
															17.7	0.204935	4.09885
															17.71	-0.100065	11.7283
															17.72	-2.23706	14.7801
															17.73	-9.25606	11.118
															17.74	-12.9181	5.01435
															17.75	-7.11906	-1.08915
															17.76	-1.62606	-5.05645
															17.77	1.73094	-5.97195
															17.78	4.47694	-3.83575
															17.79	7.83394	-3.83575
															17.8	7.83394	-7.19265
															17.81	3.56194	-8.71855
															17.82	-4.06806	-9.32885
															17.83	-6.50906	-12.6858
															17.84	-0.406065	-18.4841
															17.85	9.05494	-24.8928
															17.86	16.3789	-23.6721
															17.87	20.9566	-13.9065
															17.88	21.8721	-0.478749
															17.89	13.9379	10.5076
															17.9	-3.45706	14.1697
															17.91	-17.4951	13.2542
															17.92	-24.5141	2.57295
															17.93	-20.5471	-15.1272
															17.94	-8.64506	-28.2497
															17.95	3.56194	-29.1653
															17.96	12.4119	-19.0945
															17.97	13.0219	-4.14085
															17.98	9.66494	0.741951
															17.99	6.91894	-4.75125
															18	3.86694	-10.5495
															18.01	3.86694	-10.8547
															18.02	5.69794	-11.4651
															18.03	7.52894	-12.9909
															18.04	12.4119	-10.8547
															18.05	16.3789	-7.19265
															18.06	18.5149	-10.2444
															18.07	12.7169	-20.01
															18.08	2.03594	-21.841
															18.09	-9.56106	-10.8547
															18.1	-8.95106	3.79365
															18.11	1.11994	8.67645
															18.12	9.96994	5.62475
															18.13	15.1579	-0.783949
															18.14	18.2099	-4.44605
															18.15	24.9239	-5.36155
															18.16	24.0084	-5.66675
															18.17	15.1579	-7.80295
															18.18	2.95094	-13.2961
															18.19	-1.62606	-13.2961
															18.2	1.11994	-7.80295
															18.21	8.44394	-3.83575
															18.22	12.7169	-0.173649
															18.23	12.7169	5.31955
															18.24	8.44394	14.4749
															18.25	5.08794	19.3577
															18.26	11.4959	8.67645
															18.27	17.9049	-6.58225
															18.28	15.4639	-9.93925
															18.29	6.30794	-5.36155
															18.3	-0.100065	2.57295
															18.31	2.95094	11.118
															18.32	13.3269	12.3387
															18.33	20.6514	12.3387
															18.34	19.7359	6.84545
															18.35	13.9379	-0.478749
															18.36	10.5809	-5.97195
															18.37	11.4959	-6.27715
															18.38	15.4639	1.35225
															18.39	21.2618	10.5076
															18.4	23.7032	19.3577
															18.41	20.0409	25.4612
															18.42	13.3269	20.2732
															18.43	11.4959	8.06615
															18.44	10.5809	-1.08915
															18.45	5.39294	-5.05645
															18.46	1.42494	-2.92015
															18.47	0.509935	3.79365
															18.48	5.39294	13.2542
															18.49	16.0739	17.8318
															18.5	22.1773	16.0008
															18.51	22.7877	6.23505
															18.52	22.1773	-5.36155
															18.53	29.8067	-11.4651
															18.54	34.3843	-9.32885
															18.55	24.3135	-1.69945
															18.56	7.83394	3.18335
															18.57	-3.76306	8.06615
															18.58	-6.81406	10.8128
															18.59	1.73094	11.118
															18.6	10.2759	3.18335
															18.61	9.66494	-5.66675
															18.62	4.78194	-10.2444
															18.63	1.11994	-5.97195
															18.64	3.25594	1.96265
															18.65	6.91894	10.5076
															18.66	8.44394	8.67645
															18.67	5.69794	-1.08915
															18.68	6.61294	-11.1599
															18.69	10.5809	-14.2116
															18.7	15.1579	-8.71855
															18.71	16.9889	1.35225
															18.72	22.1773	9.89715
															18.73	23.0928	13.5594
															18.74	16.6839	9.28685
															18.75	7.83394	2.57295
															18.76	-2.84706	-4.75125
															18.77	-16.8851	-2.61505
															18.78	-25.4301	3.79365
															18.79	-21.1581	1.04705
															18.8	-4.06806	-6.88745
															18.81	12.4119	-8.10815
															18.82	17.9049	-5.36155
															18.83	16.3789	-6.88745
															18.84	15.1579	-5.66675
															18.85	18.5149	-2.30985
															18.86	21.2618	-0.173649
															18.87	17.5999	-3.83575
															18.88	16.6839	-8.41335
															18.89	10.5809	-9.02375
															18.9	2.95094	-6.27715
															18.91	-3.76306	-3.53055
															18.92	-12.6131	-3.83575
															18.93	-10.1711	-6.58225
															18.94	1.11994	-9.32885
															18.95	10.8859	-7.19265
															18.96	10.2759	-0.478749
															18.97	3.25594	1.65745
															18.98	1.73094	-0.478749
															18.99	8.74994	-5.36155
															19	15.1579	-5.66675
															19.01	20.6514	-8.71855
															19.02	24.9239	-13.6013
															19.03	25.5342	-12.9909
															19.04	22.1773	-4.14085
															19.05	13.0219	9.59205
															19.06	5.39294	16.0008
															19.07	5.08794	13.2542
															19.08	12.4119	7.15065
															19.09	20.3459	0.741951
															19.1	20.3459	-0.783949
															19.11	10.8859	-5.97195
															19.12	-0.711065	-15.4323
															19.13	-5.28806	-19.7048
															19.14	-1.32106	-11.1599
															19.15	9.66494	0.741951
															19.16	19.7359	6.84545
															19.17	20.0409	1.65745
															19.18	16.6839	-9.63405
															19.19	16.6839	-13.6013
															19.2	17.9049	-8.71855
															19.21	17.5999	-2.92015
															19.22	14.5479	3.79365
															19.23	10.5809	9.89715
															19.24	4.17194	10.2024
															19.25	3.56194	-3.83575
															19.26	2.03594	-17.5686
															19.27	0.814935	-26.4187
															19.28	0.509935	-19.7048
															19.29	2.64594	-6.27715
															19.3	3.86694	11.4231
															19.31	2.64594	21.1888
															19.32	-3.45706	20.2732
															19.33	-16.2751	10.8128
															19.34	-23.5991	0.436751
															19.35	-15.6641	-10.2444
															19.36	0.814935	-12.0754
															19.37	18.2099	-5.05645
															19.38	31.0274	5.31955
															19.39	32.8585	11.4231
															19.4	24.3135	5.01435
															19.41	14.8529	-9.32885
															19.42	10.5809	-20.3152
															19.43	5.69794	-28.5549
															19.44	4.47694	-25.8083
															19.45	4.17194	-16.3479
															19.46	0.509935	-2.30985
															19.47	-2.54206	10.5076
															19.48	-2.84706	20.8836
															19.49	0.509935	20.2732
															19.5	2.64594	8.37135
															19.51	2.03594	-6.88745
															19.52	1.42494	-9.32885
															19.53	7.22394	-6.27715
															19.54	16.9889	-5.97195
															19.55	26.4498	-11.7702
															19.56	34.6895	-17.2634
															19.57	36.8257	-23.0617
															19.58	31.0274	-20.9255
															19.59	19.7359	-16.0427
															19.6	9.05494	-8.10815
															19.61	0.814935	0.741951
															19.62	-1.32106	10.8128
															19.63	1.73094	11.4231
															19.64	6.30794	10.5076
															19.65	12.1069	6.84545
															19.66	16.3789	4.40405
															19.67	12.7169	1.96265
															19.68	0.814935	0.436751
															19.69	-8.03506	-3.53055
															19.7	-8.03506	-8.41335
															19.71	-1.93106	-8.71855
															19.72	12.7169	-3.83575
															19.73	22.1773	1.04705
															19.74	17.5999	10.2024
															19.75	7.52894	16.3059
															19.76	6.30794	11.118
															19.77	5.39294	0.436751
															19.78	-2.23706	-6.58225
															19.79	-9.56106	-3.83575
															19.8	-15.6641	4.70925
															19.81	-16.2751	11.118
															19.82	-12.0021	8.37135
															19.83	-6.50906	-1.08915
															19.84	-1.93106	-3.22535
															19.85	-2.84706	-1.08915
															19.86	0.204935	-1.39435
															19.87	11.8009	-7.80295
															19.88	18.2099	-18.1789
															19.89	17.2949	-31.6067
															19.9	18.8199	-36.4895
															19.91	17.9049	-29.4704
															19.92	13.3269	-12.0754
															19.93	9.35994	-1.08915
															19.94	2.95094	5.62475
															19.95	4.78194	6.23505
															19.96	4.17194	4.09885
[truncated: 1,504 more rows]
