# Supplementary material for: Microtubule assembly by tau impairs endocytosis and neurotransmission via dynamin sequestration in Alzheimer’s disease synapse model
Source: eLife. 2022 Apr 26;11:e73542. doi: 10.7554/eLife.73542 (PMC9071263; doi:10.7554/eLife.73542)
Supplement: Figure 4—source data 2. [file elife-73542-fig4-data2.xlsx]

## Sheet: Sheet1
Legend : Data from Figure 4B
	hTau			beta3-Tubulin			Dynamin
	Control	Loaded		Control	Loaded		Control	Loaded
	0.792415	2.7525		1.15939	1.93231		1.10333	1.514
	0.88024	3.60279		1.49544	2.64842		1.08441	2.36374
	0.345309	2.21756		0.528885	1.56905		0.391749	2.42808
	1.05589	3.03593		1.46471	2.74524		1.93603	3.87699
	1.92615	3.58483		0.736918	1.71547		0.484481	2.86715
