# Supplementary material for: Microtubule assembly by tau impairs endocytosis and neurotransmission via dynamin sequestration in Alzheimer’s disease synapse model
Source: eLife. 2022 Apr 26;11:e73542. doi: 10.7554/eLife.73542 (PMC9071263; doi:10.7554/eLife.73542)
Supplement: Figure 5—figure supplement 1—source data 2. [file elife-73542-fig5-figsupp1-data2.xlsx]

## Sheet: Sheet1
Legend : Data from Figure 5 –figure supplement 1
				Dyn1 in ppt (%)
	control			22.6
	peptide①			25.7
	peptide②			88.6
	peptide③			97.7
	peptide④			34.9
	peptide⑤			6.3
	peptide⑥			N.D.
	peptide⑦			67.85
	peptide⑧			N.D.
	peptide⑨			N.D.
	peptide⑩			N.D.
	peptide⑪			N.D.
	peptide⑫			16.2
	peptide⑬			60.8
	peptide⑭			23.2
	peptide⑮			18.5
	peptide⑯			12.3
	peptide⑰			25.3
	peptide⑱			45.75
	peptide⑲			18.5
	peptide⑳			20.8
	peptide㉑			21.6
	peptide㉒			34.6
