# Supplementary material for: Microtubule assembly by tau impairs endocytosis and neurotransmission via dynamin sequestration in Alzheimer’s disease synapse model
Source: eLife. 2022 Apr 26;11:e73542. doi: 10.7554/eLife.73542 (PMC9071263; doi:10.7554/eLife.73542)
Supplement: Figure 5—source data 1. [file elife-73542-fig5-data1.xlsx]

## Sheet: Sheet1
Legend: Data from Figure 5A
	Dyn1 alone	Dyn1+MT	Dyn1+MT+Peptide5
Aveage	1.7	22.6	6.3
SEM	0.43	2.44	2.43
	Dyn1 alone vs Dyn1+MT
	P<0.0001
	Dyn1+MT vs Dyn1+MT+Peptide5
	P=0.0006
	Dyn1 alone vs Dyn1+MT+Peptide5
	P=0.2965
	Tukey HSD
