# Supplementary material for: Microtubule assembly by tau impairs endocytosis and neurotransmission via dynamin sequestration in Alzheimer’s disease synapse model
Source: eLife. 2022 Apr 26;11:e73542. doi: 10.7554/eLife.73542 (PMC9071263; doi:10.7554/eLife.73542)
Supplement: Figure 5—source data 2. [file elife-73542-fig5-data2.xlsx]

## Sheet: Fig5_B
Legend : Data from Figure 5B and C, For Fibure 5B
	Time	PHDP5	Tau	PHDP5 + Tau	SPHDP5 + Tau					Endocytic rate	SEM		PHDP5	Tau	PHDP5 + Tau	SPHDP5 + Tau			dCm	SEM		PHDP5	Tau	PHDP5 + Tau	SPHDP5 + Tau
	-5	0.000908	0.00221	-0.010395	0				PHDP5	0.0577001	0.00420547		0.0695844	0.0150145	0.0377403	0.0253766		PHDP5	0.402995	0.0242029		0.330967	0.455625	0.4	0.43
	-4.5	0.00186	0.0059	0.00149	0.00296				Tau	0.0265432	0.00333218		0.0401299	0.0415896	0.0277922	0.0238961		Tau	0.385684	0.0225698		0.38	0.467865	0.32	0.31
	-4	0.000687	0.00148	0.00297	0				PHDP5 + Tau	0.0419927	0.00378955		0.0582857	0.0375459	0.0547273	0.036513		PHDP5 + Tau	0.385714	0.021028		0.42	0.315085	0.39	0.45
	-3.5	-0.00101	0.000738	-0.00446	0.00148				SPHDP5 + Tau	0.0263052	0.00215797		0.068026	0.0287532	0.0355714	0.026961		SPHDP5 + Tau	0.403333	0.024037		0.46	0.3375	0.39	0.35
	-3	0.0011	0.00295	-0.00149	0.00444								0.0460308	0.0265532	0.0463896	0.0227532						0.31	0.3836	0.31	0.45
	-2.5	9.54e-05	-0.00443	-0.00297	-0.00148								0.0647273	0.0172078	0.0539481	0.0223312						0.47	0.4533	0.42	0.43
	-2	-0.00102	0	0.00446	-0.00296								0.0571169	0.0261558	0.03778							0.45	0.3288	0.47
	-1.5	-0.000126	0	0	-0.00444									0.0195257									0.3437
	-1	-0.000323	-0.00369	0.00149	-0.0074
	-0.5	-0.00311	-0.00221	0.00446	-0.00888
	0.025	0.305	0.295	0.297	0.296
	0.525	0.299	0.282	0.293733	0.2956
	1.025	0.291	0.28	0.290169	0.29368
	1.525	0.289	0.276	0.286605	0.29076
	2.025	0.277	0.273	0.282447	0.28855
	2.525	0.272	0.269	0.277101	0.28211
	3.025	0.266	0.26	0.271755	0.27819
	3.525	0.253	0.26	0.266409	0.27077
	4.025	0.247	0.256	0.262845	0.26883
	4.525	0.24	0.25	0.256905	0.26587
	5.025	0.231	0.243	0.254232	0.26535
	5.525	0.222	0.242	0.247104	0.26387
	6.025	0.216	0.243	0.242649	0.26091
	6.525	0.208	0.241	0.234333	0.26239
	7.025	0.2	0.236	0.230175	0.25351
	7.525	0.193	0.235	0.22275	0.25203
	8.025	0.185	0.231	0.218592	0.24463
	8.525	0.179	0.226	0.214731	0.24463
	9.025	0.172	0.228	0.208791	0.24463
	9.525	0.166	0.224	0.203742	0.24315
	10.025	0.162	0.224	0.201366	0.24463
	10.525	0.156	0.22	0.197208	0.24167
	11.025	0.151	0.219	0.192456	0.23427
	11.525	0.146	0.224	0.187358	0.24019
	12.025	0.145	0.217	0.186516	0.23427
	12.525	0.1421	0.217	0.181467	0.23279
	13.025	0.136	0.213	0.182606	0.23279
	13.525	0.136	0.215	0.183636	0.23279
	14.025	0.13	0.213	0.173775	0.22991
	14.525	0.124	0.216	0.175241	0.22843
	15.025	0.123	0.214	0.172162	0.22391
	15.525	0.12	0.214	0.172696	0.22051
	16.025	0.117	0.209	0.171271	0.22243
	16.525	0.113	0.21	0.171271	0.22687
	17.025	0.113	0.21	0.169786	0.22243
	17.525	0.107	0.213	0.163846	0.21987
	18.025	0.107	0.215	0.165331	0.21575
	18.525	0.105	0.212	0.157906	0.22483
	19.025	0.102	0.214	0.157906	0.22483
	19.525	0.098	0.211	0.162361	0.22039
	20.025	0.095	0.216	0.156421	0.21891
	20.525	0.095	0.221	0.154936	0.22335
	21.025	0.093	0.217	0.157796	0.21635
	21.525	0.087	0.219	0.148886	0.20895
	22.025	0.084	0.221	0.156311	0.21635
	22.525	0.0847	0.228	0.151856	0.21635
	23.025	0.0824	0.223	0.154826	0.21635
	23.525	0.0879	0.216	0.148886	0.21635
	24.025	0.0865	0.214	0.151856	0.21487
	24.525	0.0791	0.216	0.148886	0.21931
	25.025	0.0798	0.215	0.144431	0.21487
	25.525	0.0767	0.216	0.139976	0.22227
	26.025	0.0836	0.214	0.146807	0.22967
	26.525	0.0816	0.217	0.141164	0.21931
	27.025	0.0823	0.216	0.135224	0.22671
	27.525	0.0845	0.219	0.135521	0.22227
	28.025	0.0774	0.215	0.138491	0.21931
	28.525	0.079	0.218	0.135521	0.21783
	29.025	0.0761	0.215	0.134036	0.21931
	29.525	0.0728	0.218	0.138491	0.22523
	30.025	0.0702	0.219	0.131066	0.22523

## Sheet: Fig5_C
Legend : Data from Figure 5B and C, For Fibure 5C
	Time		PHDP5	SEM		PHDP5 + Tau	SEM		SPHDP5 + Tau	SEM		Tau				Inhibition rate	SEM		Tau	PHDP5 + Tau	SPHDP5 + Tau	Tau
	-10		1.07586	0.04097		1.01701	0.0156912		1.03344	0.0343482		1.00877			Tau	0.232726	0.0916094		0.0217065	0.698873	0.341484	0.99988
	-9		1.04314	0.0345654		0.974661	0.0257428		1.10499	0.125318		0.976681			PHDP5 + Tau	0.778205	0.0379072		0.139423	0.693561	0.413259	0.886341
	-8		0.970695	0.0308934		1.04286	0.0117017		1.06225	0.0287654		1.0295			SPHDP5 + Tau	0.317609	0.0607711		0.169663	0.748021	0.444511	1.12119
	-7		1.05102	0.00870011		0.995954	0.00375644		0.986586	0.0483421		1.10358			PHDP5	1.07167	0.084187		0.254697	0.934713	0.225587	1.27927
	-6		1.05248	0.0254132		1.00069	0.0135471		0.965842	0.0831219		1.01944							0.66468	0.839078	0.420103
	-5		0.967994	0.0183216		1.01134	0.00771343		1.02073	0.0671802		0.956947							0.146183	0.754983	0.0607086
	-4		0.994213	0.0434233		1.00267	0.011513		1.05178	0.0569923		1.04839
	-3		0.990646	0.0255258		1.01928	0.019379		1.00728	0.0130404		0.961462
	-2		0.992738	0.0491503		0.99594	0.0140914		0.963382	0.0374271		1.02268
	-1		0.998573	0.023513		0.956566	0.0139901		1.00778	0.00933313		0.935582
	0		0.938499	0.0456048		0.993896	0.0144307		0.931237	0.0361044		0.863245
	1		1.02861	0.016881		0.983018	0.024984		1.01873	0.058757		0.883108
	2		1.05092	0.0130894		0.961607	0.0242749		0.873212	0.0192022		0.779269
	3		1.02542	0.0546465		0.935485	0.018211		0.868735	0.0280622		0.829438
	4		1.02051	0.0171081		0.945294	0.0197769		0.798718	0.0440753		0.814548
	5		1.04601	0.0261069		0.910557	0.0133893		0.835592	0.0221892		0.770941
	6		1.038	0.0201231		0.874763	0.0175745		0.787173	0.0615336		0.706246
	7		0.983575	0.0294765		0.877662	0.0143992		0.71209	0.0369074		0.638961
	8		0.978073	0.0869887		0.895655	0.0354382		0.712548	0.055341		0.65415
	9		1.03223	0.0241707		0.898075	0.0353963		0.668992	0.0279256		0.619355
	10		1.02608	0.0276637		0.887191	0.0367231		0.719249	0.0387565		0.570473
	11		0.968851	0.0437088		0.904432	0.0359292		0.633739	0.0628201		0.610337
	12		0.9982	0.0375397		0.86228	0.0270474		0.561442	0.0680537		0.550527
	13		0.936338	0.0432781		0.870139	0.0378269		0.552789	0.0600905		0.614241
	14		1.01021	0.0309435		0.866709	0.0309655		0.573341	0.0544049		0.551537
	15		1.00468	0.0240189		0.853147	0.0397501		0.512398	0.0534476		0.536721
	16		1.01736	0.0266379		0.846799	0.0225237		0.51364	0.0468214		0.466273
	17		0.982909	0.0335694		0.82782	0.0167514		0.462065	0.0764814		0.438392
	18		1.02392	0.0501606		0.801712	0.0205853		0.468276	0.0522381		0.406845
	19		1.05087	0.0120608		0.805796	0.0446567		0.459084	0.074429		0.392983
	20		0.986259	0.041234		0.803424	0.0196231		0.428358	0.0722872		0.418956
	21		1.09225	0.0491839		0.806791	0.0193273		0.405262	0.045639		0.356306
	22		0.94385	0.0446472		0.7831	0.0144705		0.373378	0.0466326		0.356337
	23		0.969899	0.0349323		0.830837	0.0361611		0.364287	0.0623839		0.292739
	24		0.952862	0.0282248		0.79099	0.0169911		0.379633	0.0732731		0.310121
	25		1.07017	0.0537201		0.802828	0.0396977		0.364704	0.0615968		0.249612
	26		0.943717	0.0548739		0.784465	0.0193731		0.348009	0.0650622		0.265415
	27		1.04367	0.0392188		0.8066	0.062006		0.358723	0.0593419		0.290458
	28		0.998722	0.00892954		0.80332	0.0442056		0.348956	0.0409445		0.232807
	29		0.9909	0.0311273		0.763188	0.0242493		0.339005	0.0492416		0.268656
	30		1.07167	0.084187		0.778205	0.0379072		0.317609	0.0607711		0.232726
	31		0.950678	0.0328263		0.761569	0.020319		0.332068	0.0508973		0.273714
	32		1.08052	0.0485107		0.744467	0.0316513		0.316479	0.043416		0.258928
	33		0.992186	0.0708017		0.756234	0.0241833		0.318039	0.0519523		0.269152
	34		0.991424	0.0351793		0.796938	0.0729997		0.303348	0.0586517		0.347628
	35		0.980303	0.0615839		0.728189	0.0295263		0.278045	0.0448434		0.304766
